# Supplementary material for: Larrea tridentata: A novel source for anti-parasitic agents active against Entamoeba histolytica, Giardia lamblia and Naegleria fowleri
Source: PubMed Central journal article supplement (PMC5565192; doi:10.1371/journal.pntd.0005832), 2017-08-09

# Appendix

## Table of Contents

|                                                                                                                                                                                                                                                             |    |
|-------------------------------------------------------------------------------------------------------------------------------------------------------------------------------------------------------------------------------------------------------------|----|
| <b>Table S1.</b> $^1\text{H}$ NMR (400 MHz) and $^{13}\text{C}$ NMR (100 MHz) data for compound <b>1</b> in acetone- $\text{d}_6$ compared to the reported NMR data <sup>1</sup> ( $\delta$ in ppm, $J$ in Hz).....                                         | 3  |
| <b>Table S2.</b> $^1\text{H}$ NMR (400 MHz) and $^{13}\text{C}$ NMR (100 MHz) data for compound <b>2</b> in acetone- $\text{d}_6$ and $\text{CDCl}_3$ compared to the reported NMR data <sup>2</sup> in $\text{CDCl}_3$ ( $\delta$ in ppm, $J$ in Hz) ..... | 4  |
| <b>Table S3.</b> $^1\text{H}$ NMR (400 MHz) and $^{13}\text{C}$ NMR (100 MHz) data for compound <b>3</b> in acetone- $\text{d}_6$ and $\text{CDCl}_3$ compared to the reported NMR data <sup>2</sup> in $\text{CDCl}_3$ ( $\delta$ in ppm, $J$ in Hz) ..... | 5  |
| <b>Table S4.</b> $^1\text{H}$ NMR (400 MHz) and $^{13}\text{C}$ NMR (100 MHz) data for compound <b>4</b> in acetone- $\text{d}_6$ and $\text{CDCl}_3$ compared to the reported NMR data <sup>3</sup> in $\text{CDCl}_3$ ( $\delta$ in ppm, $J$ in Hz) ..... | 6  |
| <b>Table S5.</b> $^1\text{H}$ NMR (400 MHz) and $^{13}\text{C}$ NMR (100 MHz) data for compound <b>6</b> in acetone- $\text{d}_6$ and $\text{CDCl}_3$ compared to the reported NMR data <sup>2</sup> in $\text{CDCl}_3$ ( $\delta$ in ppm, $J$ in Hz) ..... | 7  |
| <b>Table S6.</b> $^1\text{H}$ NMR (400 MHz) and $^{13}\text{C}$ NMR (100 MHz) data for compound <b>6</b> in $\text{CD}_3\text{OD}$ compared to the reported NMR data <sup>4</sup> in acetone- $\text{d}_6$ ( $\delta$ in ppm, $J$ in Hz) .....              | 8  |
| <b>Table S7.</b> $^1\text{H}$ NMR (400 MHz) and $^{13}\text{C}$ NMR (100 MHz) data for compound <b>7</b> in acetone- $\text{d}_6$ compared to the reported NMR data <sup>5</sup> ( $\delta$ in ppm, $J$ in Hz).....                                         | 9  |
| <b>References</b> .....                                                                                                                                                                                                                                     | 9  |
| <b>Figure S1.</b> $^1\text{H}$ NMR spectrum of nordihydroguaiaretic acid ( <b>1</b> ) in $(\text{CD}_3)_2\text{CO}$ .....                                                                                                                                   | 10 |
| <b>Figure S2.</b> $^{13}\text{C}$ NMR spectrum of nordihydroguaiaretic acid ( <b>1</b> ) in $(\text{CD}_3)_2\text{CO}$ .....                                                                                                                                | 11 |
| <b>Figure S3.</b> HMQC NMR spectrum of nordihydroguaiaretic acid ( <b>1</b> ) in $(\text{CD}_3)_2\text{CO}$ .....                                                                                                                                           | 12 |
| <b>Figure S4.</b> $^1\text{H}$ NMR spectrum of 3'- <i>O</i> -methylnordihydroguaiaretic acid ( <b>2</b> ) in $(\text{CD}_3)_2\text{CO}$ .....                                                                                                               | 13 |
| <b>Figure S5.</b> $^1\text{H}$ NMR spectrum of 3'- <i>O</i> -methylnordihydroguaiaretic acid ( <b>2</b> ) in $\text{CDCl}_3$ .....                                                                                                                          | 14 |
| <b>Figure S6.</b> $^{13}\text{C}$ NMR spectrum of 3'- <i>O</i> -methylnordihydroguaiaretic acid ( <b>2</b> ) in $(\text{CD}_3)_2\text{CO}$ .....                                                                                                            | 15 |
| <b>Figure S7.</b> $^{13}\text{C}$ DEPT-135 NMR spectrum of 3'- <i>O</i> -methylnordihydroguaiaretic acid ( <b>2</b> ) in $(\text{CD}_3)_2\text{CO}$ .....                                                                                                   | 16 |
| <b>Figure S8.</b> HMQC NMR spectrum of 3'- <i>O</i> -methylnordihydroguaiaretic acid ( <b>2</b> ) in $(\text{CD}_3)_2\text{CO}$ .....                                                                                                                       | 17 |
| <b>Figure S9.</b> $^1\text{H}$ NMR spectrum of 3'-demethoxy-6- <i>O</i> -demethylisoguaiacin ( <b>3</b> ) in $(\text{CD}_3)_2\text{CO}$ .....                                                                                                               | 18 |
| <b>Figure S10.</b> $^1\text{H}$ NMR spectrum of 3'-demethoxy-6- <i>O</i> -demethylisoguaiacin ( <b>3</b> ) in $\text{CDCl}_3$ .....                                                                                                                         | 19 |
| <b>Figure S11.</b> $^{13}\text{C}$ NMR spectrum of 3'-demethoxy-6- <i>O</i> -demethylisoguaiacin ( <b>3</b> ) in $(\text{CD}_3)_2\text{CO}$ .....                                                                                                           | 20 |
| <b>Figure S12.</b> HMQC spectrum of 3'-demethoxy-6- <i>O</i> -demethylisoguaiacin ( <b>3</b> ) in $(\text{CD}_3)_2\text{CO}$ .....                                                                                                                          | 21 |
| <b>Figure S13.</b> HMBC spectrum of 3'-demethoxy-6- <i>O</i> -demethylisoguaiacin ( <b>3</b> ) in $(\text{CD}_3)_2\text{CO}$ .....                                                                                                                          | 22 |
| <b>Figure S14.</b> $^1\text{H}$ NMR spectrum of nor-isoguaiacin ( <b>4</b> ) in $(\text{CD}_3)_2\text{CO}$ .....                                                                                                                                            | 23 |
| <b>Figure S15.</b> $^1\text{H}$ NMR spectrum of nor-isoguaiacin ( <b>4</b> ) in $\text{CDCl}_3$ .....                                                                                                                                                       | 24 |
| <b>Figure S16.</b> $^{13}\text{C}$ NMR spectrum of nor-isoguaiacin ( <b>4</b> ) in $(\text{CD}_3)_2\text{CO}$ .....                                                                                                                                         | 25 |
| <b>Figure S17.</b> $^{13}\text{C}$ DEPT 135 NMR spectrum of nor-isoguaiacin ( <b>4</b> ) in $(\text{CD}_3)_2\text{CO}$ .....                                                                                                                                | 26 |

|                                                                                                                                                                                                                                                       |    |
|-------------------------------------------------------------------------------------------------------------------------------------------------------------------------------------------------------------------------------------------------------|----|
| <b>Figure S18.</b> HMQC NMR spectrum of nor-isoguaicin ( <b>4</b> ) in (CD <sub>3</sub> ) <sub>2</sub> CO.....                                                                                                                                        | 27 |
| <b>Figure S19.</b> <sup>1</sup> H NMR spectrum of 3'-demethoxyisoguaiaicin ( <b>5</b> ) in (CD <sub>3</sub> ) <sub>2</sub> CO .....                                                                                                                   | 28 |
| <b>Figure S20.</b> <sup>13</sup> C NMR spectrum of 3'-demethoxyisoguaiaicin ( <b>5</b> ) in (CD <sub>3</sub> ) <sub>2</sub> CO .....                                                                                                                  | 29 |
| <b>Figure S21.</b> <sup>13</sup> C DEPT-135 NMR spectrum of 3'-demethoxyisoguaiaicin ( <b>5</b> ) in (CD <sub>3</sub> ) <sub>2</sub> CO.....                                                                                                          | 30 |
| <b>Figure S22.</b> HMQC NMR spectrum of 3'-demethoxyisoguaiaicin ( <b>5</b> ) in (CD <sub>3</sub> ) <sub>2</sub> CO .....                                                                                                                             | 31 |
| <b>Figure S23.</b> <sup>1</sup> H NMR spectrum of 6, 3'-di- <i>O</i> -demethoxy-isoguaiaicin ( <b>6</b> ) in CD <sub>3</sub> OD.....                                                                                                                  | 32 |
| <b>Figure S24.</b> <sup>13</sup> C NMR spectrum of 6, 3'-di- <i>O</i> -demethoxy-isoguaiaicin ( <b>6</b> ) in CD <sub>3</sub> OD.....                                                                                                                 | 33 |
| <b>Figure S25.</b> <sup>13</sup> C DEPT-135 NMR spectrum of 6, 3'-di- <i>O</i> -demethoxy-isoguaiaicin ( <b>6</b> ) in CD <sub>3</sub> OD .....                                                                                                       | 34 |
| <b>Figure S26.</b> <sup>1</sup> H NMR spectrum of 3'-hydroxy-4-epi-larreatricin ( <b>7</b> ) in (CD <sub>3</sub> ) <sub>2</sub> CO .....                                                                                                              | 35 |
| <b>Figure S27.</b> <sup>13</sup> C NMR spectrum of 3'-hydroxy-4-epi-larreatricin ( <b>7</b> ) in (CD <sub>3</sub> ) <sub>2</sub> CO .....                                                                                                             | 36 |
| <b>Figure S28.</b> <sup>13</sup> C DEPT-135 NMR spectrum of 3'-hydroxy-4-epi-larreatricin ( <b>7</b> ) in (CD <sub>3</sub> ) <sub>2</sub> CO.....                                                                                                     | 37 |
| <b>Figure S29.</b> <sup>13</sup> C DEPT-90 NMR spectrum of 3'-hydroxy-4-epi-larreatricin ( <b>7</b> ) in (CD <sub>3</sub> ) <sub>2</sub> CO.....                                                                                                      | 38 |
| <b>Figure S30.</b> HMQC NMR spectrum of 3'-hydroxy-4-epi-larreatricin ( <b>7</b> ) in (CD <sub>3</sub> ) <sub>2</sub> CO .....                                                                                                                        | 39 |
| <b>Figure S31.</b> <sup>1</sup> H NMR spectrum of (7 <i>R</i> , 7' <i>R</i> )-7, 7'-bis(4', 3, 4-trihydroxyphenyl)-(8 <i>R</i> , 8' <i>S</i> )-8, 8'-<br>dimethyltetrahydrofuran ( <b>8</b> ) in (CD <sub>3</sub> ) <sub>2</sub> CO .....             | 40 |
| <b>Figure S32.</b> <sup>13</sup> C NMR spectrum of of (7 <i>R</i> , 7' <i>R</i> )-7, 7'-bis(4', 3, 4-trihydroxyphenyl)-(8 <i>R</i> , 8' <i>S</i> )-8, 8'-<br>dimethyltetrahydrofuran ( <b>8</b> ) in (CD <sub>3</sub> ) <sub>2</sub> CO .....         | 41 |
| <b>Figure S33.</b> <sup>13</sup> C DEPT-135 NMR spectrum of of (7 <i>R</i> , 7' <i>R</i> )-7, 7'-bis(4', 3, 4-trihydroxyphenyl)-(8 <i>R</i> ,<br>8' <i>S</i> )-8, 8'-dimethyltetrahydrofuran ( <b>8</b> ) in (CD <sub>3</sub> ) <sub>2</sub> CO ..... | 42 |
| <b>Figure S34.</b> <sup>13</sup> C DEPT-90 NMR spectrum of of (7 <i>R</i> , 7' <i>R</i> )-7, 7'-bis(4', 3, 4-trihydroxyphenyl)-(8 <i>R</i> , 8' <i>S</i> )-<br>8, 8'-dimethyltetrahydrofuran ( <b>8</b> ) in (CD <sub>3</sub> ) <sub>2</sub> CO.....  | 43 |
| <b>Figure S35.</b> HMQC NMR spectrum of (7 <i>R</i> , 7' <i>R</i> )-7, 7'-bis(4', 3, 4-trihydroxyphenyl)-(8 <i>R</i> , 8' <i>S</i> )-8, 8'-<br>dimethyltetrahydrofuran ( <b>8</b> ) in (CD <sub>3</sub> ) <sub>2</sub> CO .....                       | 44 |
| <b>Figure S36.</b> HMBC NMR spectrum of of (7 <i>R</i> , 7' <i>R</i> )-7, 7'-bis(4', 3, 4-trihydroxyphenyl)-(8 <i>R</i> , 8' <i>S</i> )-8, 8'-<br>dimethyltetrahydrofuran ( <b>8</b> ) in (CD <sub>3</sub> ) <sub>2</sub> CO .....                    | 45 |
| <b>Figure S37.</b> NOESY NMR spectrum of of (7 <i>R</i> , 7' <i>R</i> )-7, 7'-bis(4', 3, 4-trihydroxyphenyl)-(8 <i>R</i> , 8' <i>S</i> )-8, 8'-<br>dimethyltetrahydrofuran ( <b>8</b> ) in (CD <sub>3</sub> ) <sub>2</sub> CO .....                   | 46 |
| <b>Figure S38.</b> NOESY NMR spectrum of of (7 <i>R</i> , 7' <i>R</i> )-7, 7'-bis(4', 3, 4-trihydroxyphenyl)-(8 <i>R</i> , 8' <i>S</i> )-8, 8'-<br>dimethyltetrahydrofuran ( <b>8</b> ) in (CD <sub>3</sub> ) <sub>2</sub> CO .....                   | 47 |
| <b>Figure S39.</b> <sup>1</sup> H NMR spectrum of 3-methoxy-6, 7, 4'-trihydroxyflavone ( <b>9</b> ) in CDCl <sub>3</sub> and CD <sub>3</sub> OD.....                                                                                                  | 48 |
| <b>Figure S40.</b> <sup>13</sup> C NMR spectrum of 3-methoxy-6, 7, 4'-trihydroxyflavone ( <b>9</b> ) in CDCl <sub>3</sub> and CD <sub>3</sub> OD.....                                                                                                 | 49 |
| <b>Figure S41.</b> <sup>13</sup> C DEPT-135 NMR spectrum of 3-methoxy-6, 7, 4'-trihydroxyflavone ( <b>9</b> ) in CDCl <sub>3</sub> and<br>CD <sub>3</sub> OD.....                                                                                     | 50 |
| <b>Figure S42.</b> <sup>13</sup> C DEPT-90 NMR spectrum of 3-methoxy-6, 7, 4'-trihydroxyflavone ( <b>9</b> ) in CDCl <sub>3</sub> and<br>CD <sub>3</sub> OD.....                                                                                      | 51 |
| <b>Figure S43.</b> HMQC NMR spectrum of 3-methoxy-6, 7, 4'-trihydroxyflavone ( <b>9</b> ) in CDCl <sub>3</sub> and CD <sub>3</sub> OD.....                                                                                                            | 52 |
| <b>Figure S44.</b> HMBC NMR spectrum of 3-methoxy-6, 7, 4'-trihydroxyflavone ( <b>9</b> ) in CDCl <sub>3</sub> and CD <sub>3</sub> OD.....                                                                                                            | 53 |

**Table S1.**  $^1\text{H}$  NMR (400 MHz) and  $^{13}\text{C}$  NMR (100 MHz) data for compound **1** in acetone- $\text{d}_6$  compared to the reported NMR data<sup>1</sup> ( $\delta$  in ppm,  $J$  in Hz)

| Position | <b>1</b>            |                      | Reported            |                      |
|----------|---------------------|----------------------|---------------------|----------------------|
|          | $\delta_{\text{H}}$ | $\delta_{\text{C}}$  | $\delta_{\text{H}}$ | $\delta_{\text{C}}$  |
| 1a/4a    | 2.21 dd (13.3, 9.2) | 39.2 CH <sub>2</sub> | 2.20 dd (9.0, 4.2)  | 39.2 CH <sub>2</sub> |
| 1b/4b    | 2.70 dd (13.3, 5.0) | -                    | 2.68 dd (8.4, 4.8)  | -                    |
| 2/3      | 1.74 m              | 40.2 CH              | 1.72 m              | 40.1 CH              |
| 5/6      | 0.83 d (6.64)       | 16.6 CH <sub>3</sub> | 0.82 d (6.64)       | 16.5 CH <sub>3</sub> |
| 1'/1''   | -                   | 134.4 C              | -                   | 134.4 C              |
| 2'/2''   | 6.69 d (1.8)        | 115.8 CH             | 6.68 d (1.8)        | 115.8 CH             |
| 3'/3''   | -                   | 143.7 C              | -                   | 143.7 C              |
| 4'/4''   | -                   | 145.6 C              | -                   | 145.6 C              |
| 5'/5''   | 6.73 d (7.9)        | 116.9 CH             | 6.73 d (7.8)        | 116.9 CH             |
| 6'/6''   | 6.52 dd (7.9, 1.8)  | 121.3 CH             | 6.52 dd (6.0, 1.8)  | 121.3 CH             |

**Table S2.**  $^1\text{H}$  NMR (400 MHz) and  $^{13}\text{C}$  NMR (100 MHz) data for compound **2** in acetone- $\text{d}_6$  and  $\text{CDCl}_3$  compared to the reported NMR data<sup>2</sup> in  $\text{CDCl}_3$  ( $\delta$  in ppm,  $J$  in Hz)

| Position | <b>2</b> <sup>a</sup> |                            | <b>2</b> <sup>b</sup> | Reported <sup>b</sup> |
|----------|-----------------------|----------------------------|-----------------------|-----------------------|
|          | $\delta_{\text{H}}$   | $\delta_{\text{C}}$        | $\delta_{\text{H}}$   | $\delta_{\text{C}}$   |
| 1        | 2.25 dd <sup>c</sup>  | 39.1 CH <sub>2</sub>       | 2.25 dd (13.1, 9.3)   | 2.25 dd (13.4, 9.3)   |
|          | 2.75 dd (13.4, 4.8)   |                            | 2.71 dd (13.3, 4.8)   | 2.71 dd (13.4, 4.7)   |
| 2,3      | 1.75 m                | 39.9, 40.0 CH              | 1.73 m                | 1.72 m                |
| 4        | 2.24 dd <sup>c</sup>  | 39.3 CH <sub>2</sub>       | 2.25 dd (13.3, 9.4)   | 2.25 dd (13.5, 9.3)   |
|          | 2.69 dd (13.4, 5.40)  |                            | 2.68 dd (13.3, 5.0)   | 2.68 dd (13.5, 5.2)   |
| 5,6      | 0.82 d, 0.84 d (6.8)  | 16.4, 16.6 CH <sub>3</sub> | 0.82 d, 0.83 d (6.6)  | 0.82 d, 0.83 d (6.7)  |
| 1'       | -                     | 134.1 C                    | -                     | -                     |
| 2'       | 6.71 d (1.9)          | 116.9 CH                   | 6.61 brd (1.9)        | 6.61 d (1.9)          |
| 3'       | -                     | 148.1 C                    | -                     | -                     |
| 4'       | -                     | 145.4 C                    | -                     | -                     |
| 5'       | 6.75 d (8.2)          | 115.4 CH                   | 6.82 d (8.0)          | 6.82 d (8.0)          |
| 6'       | 6.63 dd (8.0, 1.9)    | 122.3 CH                   | 6.64 dd (8.0, 1.9)    | 6.64 dd (8.0, 1.9)    |
| 1''      | -                     | 134.3 C                    | -                     | -                     |
| 2''      | 6.75 d (2.1)          | 113.2 CH                   | 6.67 brd (2.0)        | 6.67 d (2.0)          |
| 3''      | -                     | 143.8 C                    | -                     | -                     |
| 4''      | -                     | 145.7 C                    | -                     | -                     |
| 5''      | 6.73 d (8.0)          | 115.8 CH                   | 6.77 d (8.0)          | 6.77 d (8.0)          |
| 6''      | 6.54 dd (7.9, 1.6)    | 121.2 CH                   | 6.58 brdd (8.0, 2.0)  | 6.58 dd (8.0, 2.0)    |
| OMe      | 3.81 s                | 56.1 OCH <sub>3</sub>      | 3.86 s                | 3.86 s                |
| OH       | 7.58 brs              |                            | 5.03 brs, 5.45 s      | 5.00, 5.15, 5.45 s    |

<sup>a</sup> In acetone- $\text{d}_6$

<sup>b</sup> In  $\text{CDCl}_3$

<sup>c</sup> Overlapped signals

**Table S3.**  $^1\text{H}$  NMR (400 MHz) and  $^{13}\text{C}$  NMR (100 MHz) data for compound **3** in acetone- $\text{d}_6$  and  $\text{CDCl}_3$  compared to the reported NMR data<sup>2</sup> in  $\text{CDCl}_3$  ( $\delta$  in ppm,  $J$  in Hz)

| Position | <b>3</b> <sup>a</sup> |                      | <b>3</b> <sup>b</sup> | Reported <sup>b</sup> |
|----------|-----------------------|----------------------|-----------------------|-----------------------|
|          | $\delta_{\text{H}}$   | $\delta_{\text{C}}$  | $\delta_{\text{H}}$   | $\delta_{\text{H}}$   |
| 1        | 3.59 d (6.3)          | 50.8 CH              | 3.57 d (6.2)          | 3.59 d (6.2)          |
| 2        | 1.89 m                | 41.8 CH              | 1.89 m                | 1.90 m                |
| 3        | 2.03 m                | 30.1 CH              | 1.99 m                | 2.01 m                |
| 4a       | 2.81 dd (16.2, 5.2)   | 35.7 CH <sub>2</sub> | 2.83 dd (16.4, 5.5)   | 2.84 dd (16.3, 5.3)   |
| 4b       | 2.39 dd (16.2, 7.2)   |                      | 2.41 dd (16.4, 7.2)   | 2.42 dd (16.3, 7.2)   |
| 5        | 6.56 s                | 115.9 CH             | 6.60 s                | 6.62 s                |
| 6        | -                     | 144.0 C              | -                     | -                     |
| 7        | -                     | 144.4 C              | -                     | -                     |
| 8        | 6.23 s                | 117.7 CH             | 6.29 s                | 6.31 s                |
| 9        | -                     | 128.1 C              | -                     | -                     |
| 10       | -                     | 130.7 C              | -                     | -                     |
| 11       | 0.88 d (6.9)          | 16.1 CH <sub>3</sub> | 0.87 d (6.9)          | 0.87 d (6.9)          |
| 12       | 0.89 d (6.9)          | 16.3 CH <sub>3</sub> | 0.88 d (6.9)          | 0.88 d (6.9)          |
| 1'       | -                     | 139.3 C              | -                     | -                     |
| 2'       | 6.85 d (8.4)          | 130.8 CH             | 6.86 d (8.5)          | 6.89 d (8.5)          |
| 3'       | 6.71 d (8.4)          | 115.7 CH             | 6.69 d (8.5)          | 6.72 d (8.5)          |
| 4'       | -                     | 156.3 C              | -                     | -                     |
| 5'       | 6.71 d (8.4)          | 115.7 CH             | 6.69 d (8.5)          | 6.72 d (8.5)          |
| 6'       | 6.85 d (8.4)          | 130.8 CH             | 6.86 d (8.5)          | 6.89 d (8.5)          |
| OH       | 8.06, 7.46, 7.43      |                      | 5.25 s, 5.35 s        | very broad            |

<sup>a</sup> In acetone- $\text{d}_6$

<sup>b</sup> In  $\text{CDCl}_3$

**Table S4.**  $^1\text{H}$  NMR (400 MHz) and  $^{13}\text{C}$  NMR (100 MHz) data for compound **4** in acetone- $d_6$  and  $\text{CDCl}_3$  compared to the reported NMR data<sup>3</sup> in  $\text{CDCl}_3$  ( $\delta$  in ppm,  $J$  in Hz)

| Position | <b>4</b> <sup>a</sup> |                       | <b>4</b> <sup>b</sup> |                       | Reported <sup>b</sup> |                       |
|----------|-----------------------|-----------------------|-----------------------|-----------------------|-----------------------|-----------------------|
|          | $\delta_{\text{H}}$   | $\delta_{\text{C}}$   | $\delta_{\text{H}}$   | $\delta_{\text{C}}$   | $\delta_{\text{H}}$   | $\delta_{\text{C}}$   |
| 1        | 3.55 d (6.8)          | 51.0 CH               | 3.56 d (6.8)          | 50.5 CH               | 3.56 d (6.5)          | 50.3 CH               |
| 2        | 2.01 m                | 30.4 CH               | 2.0 m                 | 29.4 CH               | 2.0 dd (6.6, 3.0)     | 29.1 CH               |
| 3        | 1.94 dt (6.9, 3.0)    | 41.5 CH               | 1.91 dt (6.8, 3.0)    | 40.7 CH               | 1.91 dt (6.9, 6.5)    | 40.5 CH               |
| 4a       | 2.39 dd (16.3, 6.9)   | 35.7 CH <sub>2</sub>  | 2.41 dd (16.4, 7.0)   | 35.1 CH <sub>2</sub>  | 2.41 dd (16.5, 6.9)   | 34.8 CH <sub>2</sub>  |
| 4b       | 2.84 dd (16.3, 5.3)   |                       | 2.83 dd (16.4, 5.3)   |                       | 2.83 dd (16.5, 6.9)   |                       |
| 5        | 6.56 s                | 115.8 CH              | 6.32 s                | 115.0 CH              | 6.29 s                | 114.7 CH              |
| 6        | -                     | 143.8 C               | -                     | 141.4 C               | -                     | 142.1 C               |
| 7        | -                     | 144.3 C               | -                     | 142.1 C               | -                     | 142.5 C               |
| 8        | 6.25 s                | 117.5 CH              | 6.61 s                | 116.8 CH              | 6.58 s                | 116.6 CH              |
| 9        | -                     | 128.0 C               | -                     | 129.3 C               | -                     | 129.7 C               |
| 10       | -                     | 130.4 C               | -                     | 131.0 C               | -                     | 128.3 C               |
| 11       | 0.874 d (6.9)         | 16.2 CH               | 0.87 d (6.8)          | 15.9 CH <sub>3</sub>  | 0.87 d (6.9)          | 15.6 CH <sub>3</sub>  |
| 12       | 0.867 d (6.9)         | 15.9 CH               | 0.88 d (6.8)          | 16.0 CH <sub>3</sub>  | 0.88 d (6.9)          | 15.7 CH <sub>3</sub>  |
| 1'       | -                     | 139.7 C               | -                     | 139.2 C               | -                     | 139.3 C               |
| 2'       | 6.70 d (2.0)          | 113.3 CH              | 6.52 d (1.8)          | 111.3 CH              | 6.54 s                | 111.8 CH              |
| 3'       | -                     | 148.0 C               | -                     | 146.4 C               | -                     | 146.4 C               |
| 4'       | -                     | 145.5 C               | -                     | 143.8 C               | -                     | 143.4 C               |
| 5'       | 6.71 s (8.1)          | 115.1 CH              | 6.79 d (8.0)          | 113.6 CH              | 6.74 d (7.8)          | 113.8 CH              |
| 6'       | 6.46 dd (8.1, 2.0)    | 122.5 CH              | 6.50 dd (8.0, 1.8)    | 121.9 CH              | 6.4 dd (8.1, 1.9)     | 121.8 CH              |
| OMe      | 3.76                  | 56.2 OCH <sub>3</sub> | 3.80 s                | 55.8 OCH <sub>3</sub> | 3.79 s                | 55.7 OCH <sub>3</sub> |

<sup>a</sup> In acetone- $d_6$

<sup>b</sup> In  $\text{CDCl}_3$

**Table S5.**  $^1\text{H}$  NMR (400 MHz) and  $^{13}\text{C}$  NMR (100 MHz) data for compound **6** in acetone- $d_6$  and  $\text{CDCl}_3$  compared to the reported NMR data<sup>2</sup> in  $\text{CDCl}_3$  ( $\delta$  in ppm,  $J$  in Hz)

| Position | <b>5<sup>a</sup></b> |                       | <b>5<sup>b</sup></b> | Reported <sup>b</sup> |
|----------|----------------------|-----------------------|----------------------|-----------------------|
|          | $\delta_{\text{H}}$  | $\delta_{\text{C}}$   | $\delta_{\text{H}}$  | $\delta_{\text{H}}$   |
| 1        | 3.59 d (6.4)         | 50.8 CH               | 3.61 d (6.1)         | 3.61 d (6.2)          |
| 2        | 1.90 m               | 41.7 CH               | 1.90 m               | 1.90 m                |
| 3        | 2.02 m               | 30.0 CH               | 2.0 m                | 2.02 m                |
| 4a       | 2.88 dd (16.3, 5.4)  | 35.8 CH <sub>2</sub>  | 2.87 dd (6.2, 5.0)   | 2.87 dd (16.2, 7.2)   |
| 4b       | 2.45 dd (16.3, 7.3)  |                       | 2.45 dd (16.2, 7.2)  | 2.45 dd (16.2, 7.2)   |
| 5        | 6.66 s               | 112.3 CH              | 6.57 s               | 6.57 s                |
| 6        | -                    | 145.4 C               | -                    | -                     |
| 7        | -                    | 156.3 C               | -                    | -                     |
| 8        | 6.26 s               | 117.4 CH              | 6.39 s               | 6.39 s                |
| 9        | -                    | 127.6 C               | -                    | -                     |
| 10       | -                    | 131.5 C               | -                    | -                     |
| 11       | 0.87 d (6.9)         | 16.0 CH <sub>3</sub>  | 0.88 d (6.9)         | 0.88 d (6.9)          |
| 12       | 0.88 d (6.9)         | 16.2 CH <sub>3</sub>  | 0.89 d (6.9)         | 0.89 d (8.9)          |
| 1'       | -                    | 139.0 C               | -                    | -                     |
| 2'       | 6.86 d (8.5)         | 130.7 CH              | 6.87 d (8.5)         | 6.87 d (8.5)          |
| 3'       | 6.72 d (8.5)         | 115.6 CH              | 6.70 d (8.5)         | 6.70 d (8.5)          |
| 4'       | -                    | 146.8 C               | -                    | -                     |
| 5'       | 6.72 d (8.5)         | 115.6 CH              | 6.70 d (8.5)         | 6.70 d (8.5)          |
| 6'       | 6.86 d (8.5)         | 130.7 CH              | 6.87 d (8.5)         | 6.87 d (8.5)          |
| OMe      | 3.80 s               | 56.1 OCH <sub>3</sub> | 3.86 s               | 3.86                  |
| OH       | 8.0, s, 7.1, s       |                       | 4.85 s, 5.32 s       | 4.78 s, 5.35 s        |

<sup>a</sup> In acetone- $d_6$

<sup>b</sup> In  $\text{CDCl}_3$

**Table S6.**  $^1\text{H}$  NMR (400 MHz) and  $^{13}\text{C}$  NMR (100 MHz) data for compound **6** in  $\text{CD}_3\text{OD}$  compared to the reported NMR data<sup>4</sup> in acetone- $\text{d}_6$  ( $\delta$  in ppm,  $J$  in Hz)

| Position | <b>6</b> <sup>a</sup> |                          | Reported <sup>b</sup> |                          |
|----------|-----------------------|--------------------------|-----------------------|--------------------------|
|          | $\delta_{\text{H}}$   | $\delta_{\text{C}}$      | $\delta_{\text{H}}$   | $\delta_{\text{C}}$      |
| 1        | 3.48 d (6.4)          | 51.5 CH                  | 3.51 d (6.3)          | 50.8 CH                  |
| 2        | 1.88 dt (6.8, 2.8)    | 42.2 CH                  | 1.88 m                | 41.5 CH                  |
| 3        | 2.01 m                | 30.6 CH                  | 2.02 m                | 29.8 CH                  |
| 4a       | 2.38 dd (16.4, 7.2)   | 36.0 $\text{CH}_2$       | 2.37 dd (16.5, 7.7)   | 35.4 $\text{CH}_2$       |
| 4b       | 2.80 dd (16.4, 5.6)   |                          | 2.80 dd (16.5, 5.4)   |                          |
| 5        | 6.50 s                | 116.0 or 115.8 CH        | 6.56 s                | 115.5 or 115.7 CH        |
| 6, 7     | -                     | 144.2, 144.1 C           | -                     | 143.7 C                  |
| 8        | 6.25 s                | 118.1 CH                 | 6.26 s                | 117.6 CH                 |
| 9        | -                     | 128.5 C                  | -                     | 128.0 C                  |
| 10       | -                     | 140.6 C                  | -                     | 140.0 C                  |
| 11,12    | 0.88 dd (7.2, 3.2)    | 16.2, 16.1 $\text{CH}_3$ | 0.87 d (6.8)          | 16.0, 16.2 $\text{CH}_3$ |
| 1'       | -                     | 130.9 C                  | -                     | 130.3 C                  |
| 2'       | 6.43 d (2.0)          | 117.3 CH                 | 6.44 brs              | 116.8 CH                 |
| 3'       | -                     | 145.8 C                  | -                     | 145.2 C                  |
| 4'       | -                     | 144.5 C                  | -                     | 144.0 C                  |
| 5'       | 6.66 d (8.0)          | 116.0 or 115.8 CH        | 6.71 d (8.7)          | 115.5 or 115.7 CH        |
| 6'       | 6.39 dd (8.0, 2.0)    | 121.6 CH                 | 6.43 dd (8.7, 2.1)    | 121.2 CH                 |

<sup>a</sup> In  $\text{CD}_3\text{OD}$

<sup>b</sup> In acetone- $\text{d}_6$



**Table S7.**  $^1\text{H}$  NMR (400 MHz) and  $^{13}\text{C}$  NMR (100 MHz) data for compound **7** in acetone- $d_6$  compared to the reported NMR data<sup>5</sup> ( $\delta$  in ppm,  $J$  in Hz)

| Position | <b>7</b>            |                     | Reported            |                     |
|----------|---------------------|---------------------|---------------------|---------------------|
|          | $\delta_{\text{H}}$ | $\delta_{\text{C}}$ | $\delta_{\text{H}}$ | $\delta_{\text{C}}$ |
| 1        | -                   | 135.9               | -                   | 135.8               |
| 2        | 6.91 d (1.9)        | 114.2               | 6.92 d (92.1)       | 114.2               |
| 3        | -                   | 145.8               | -                   | 145.8               |
| 4        | -                   | 145.2               | -                   | 145.1               |
| 5        | 6.79 d (7.5)        | 115.7               | 6.79 d (7.7)        | 115.7               |
| 6        | 6.72 dd (7.9, 1.9)  | 118.7               | 6.74 dd (7.7, 2.1)  | 118.7               |
| 7        | 4.56 d (8.9)        | 88.8                | 4.56 d (8.4)        | 88.8                |
| 8        | 1.72 m              | 52.0                | 1.72 m              | 52.0                |
| 9        | 1.01 d (6.0)        | 14.0                | 1.10 d (5.4)        | 14.0                |
| 1'       | -                   | 134.8               | -                   | 134.8               |
| 2', 6'   | 7.23 d (7.5)        | 128.4               | 7.24                | 128.4               |
| 3', 5'   | 6.81 d (8.6)        | 115.8               | 6.82 d (8.6)        | 115.8               |
| 4'       | -                   | 157.6               | -                   | 157.6               |
| 7'       | 4.54 d (8.9)        | 88.8                | 4.54 d (8.4)        | 88.8                |
| 8'       | 1.72 m              | 51.9                | 1.72 m              | 51.9                |
| 9'       | 0.99 d (6.0)        | 14.1                | 0.99 d (5.4)        | 14.1                |

## References

- (1) Gezginci, M. H.; Timmermann, B. N., *Tetrahedron Lett.* **2001**, *42*, 6083-6085.
- (2) Gnabre, J.; Huang, R. C. C.; Bates, R. B.; Burns, J. J.; Caldera, S.; Malcomson, M. E.; McClure, K. J., *Tetrahedron* **1995**, *51*, 12203-12210.
- (3) Torres, R.; Urbina, F.; Morales, C.; Modak, B.; Delle Monache, F., *J Chil Chem Soc* **2003**, *48*, 61-63.
- (4) Konno, C.; Xue, H.-Z.; Lu, Z.-Z.; Ma, B.-X.; Erdelmeier, C. A. J.; Che, C.-T.; Cordell, G. A.; Soejarto, D. D.; Waller, D. P.; Fong, H. H. S., *J. Nat. Prod.* **1989**, *52*, 1113-1117.
- (5) Konno, C.; Lu, Z. Z.; Xue, H. Z.; Erdelmeier, C. A. J.; Meksuriyen, D.; Che, C. T.; Cordell, G. A.; Soejarto, D. D.; Waller, D. P.; Fong, H. H. S., *J. Nat. Prod.* **1990**, *53*, 396-406.

**Figure S1.**  $^1\text{H}$  NMR spectrum of nordihydroguaiaretic acid (**1**) in  $(\text{CD}_3)_2\text{CO}$

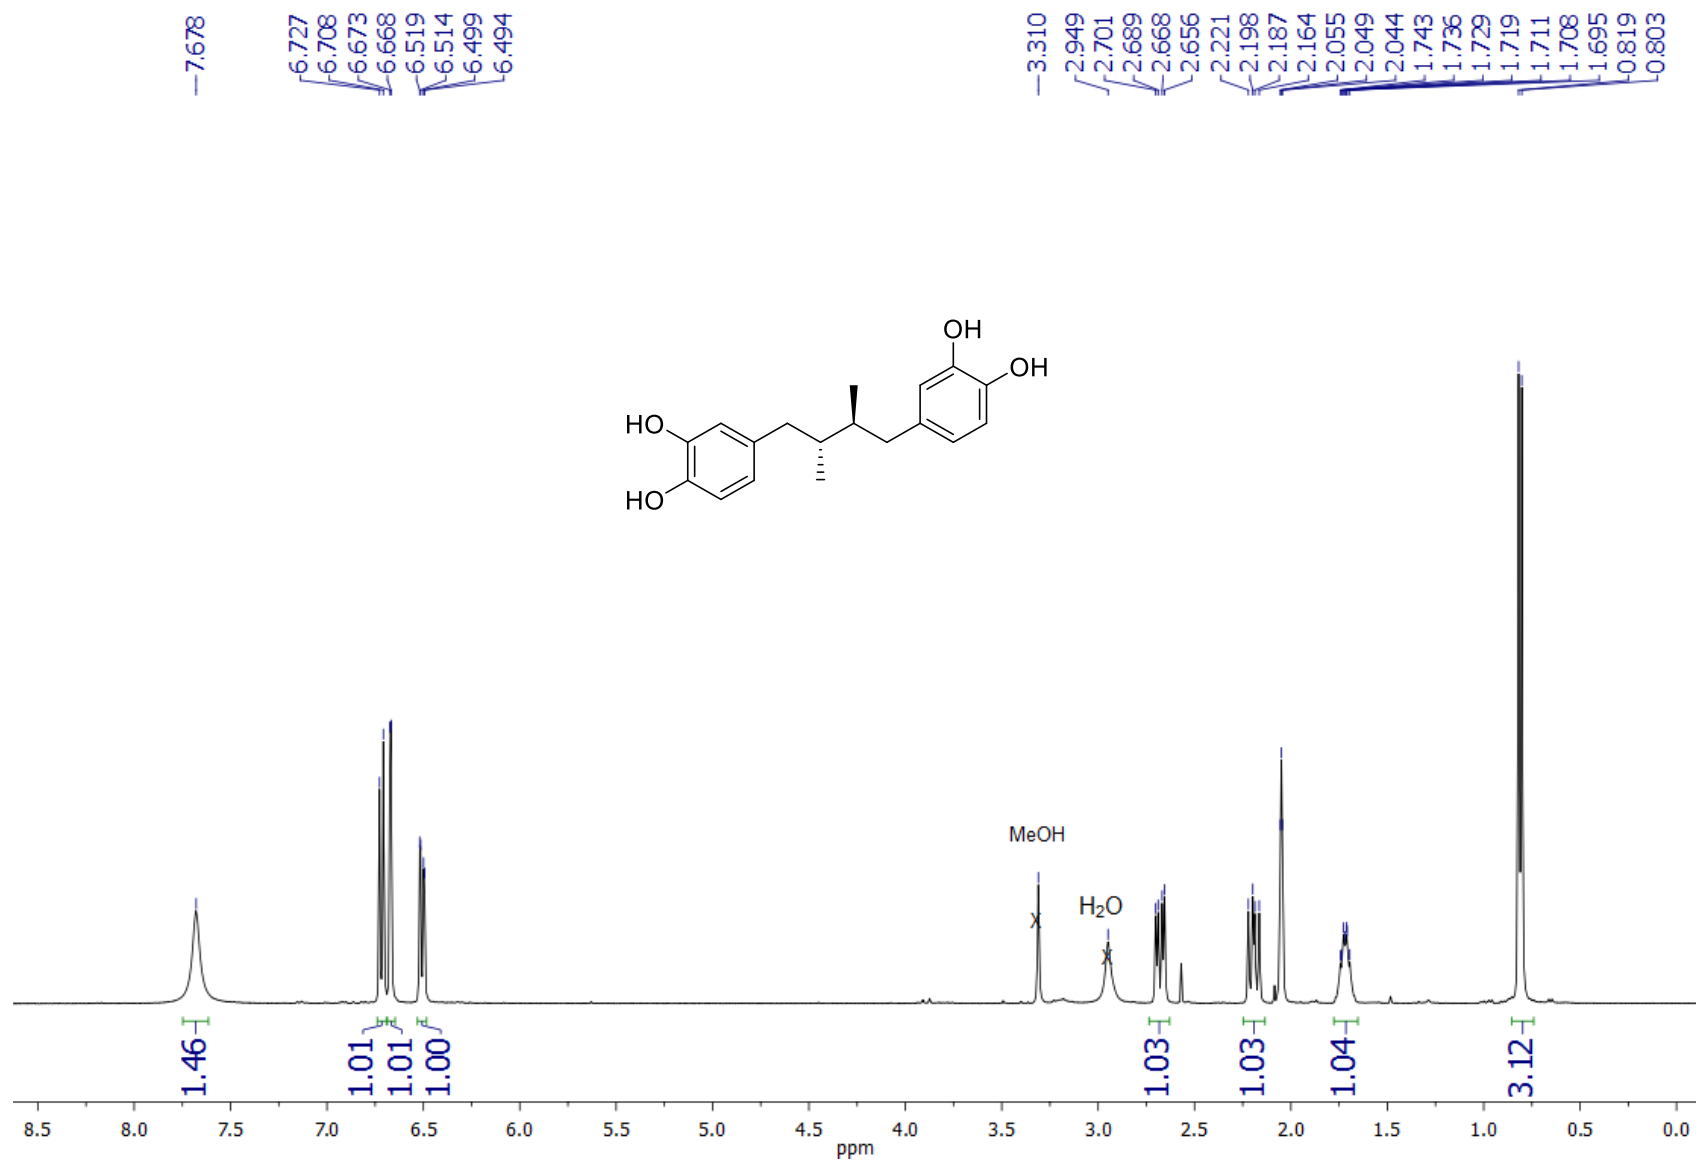

Figure S2.  $^{13}\text{C}$  NMR spectrum of nordihydroguaiaretic acid (**1**) in  $(\text{CD}_3)_2\text{CO}$

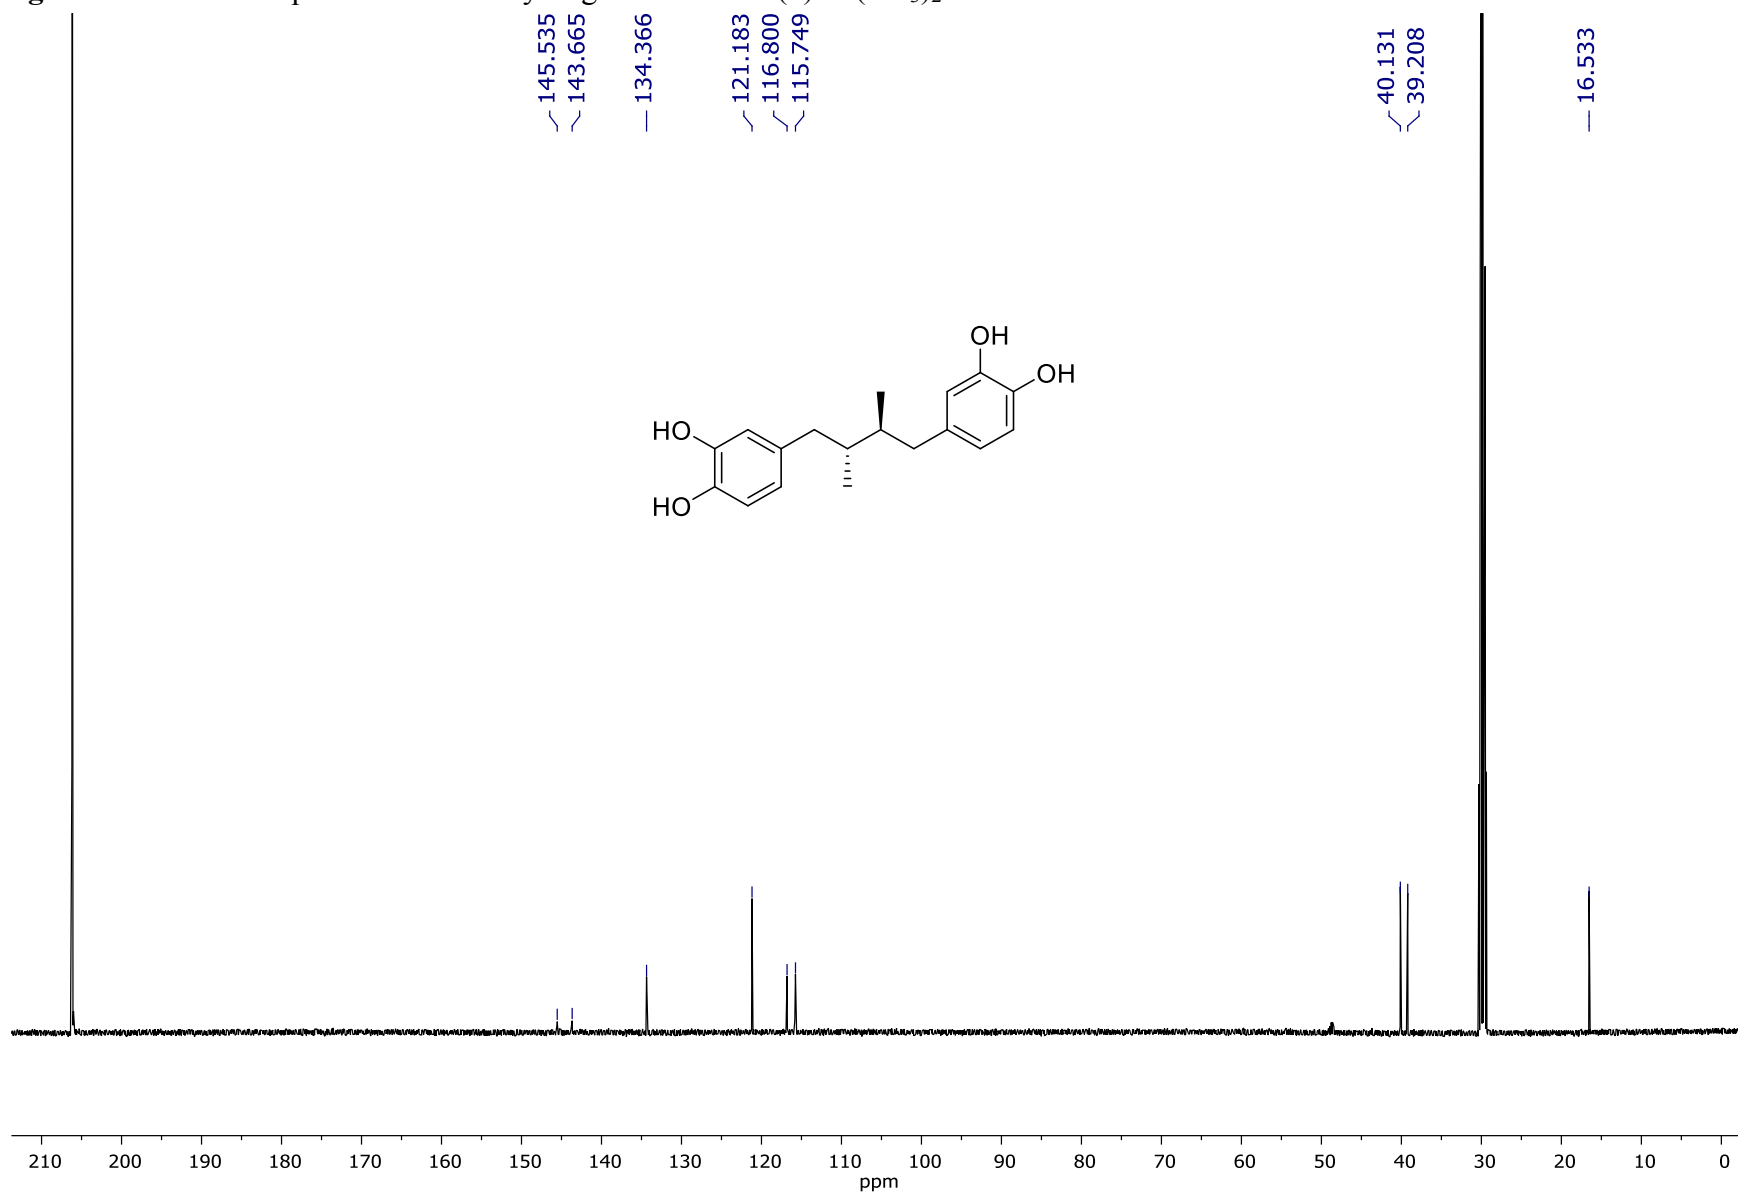

**Figure S3.** HMQC NMR spectrum of nordihydroguaiaretic acid (**1**) in  $(\text{CD}_3)_2\text{CO}$

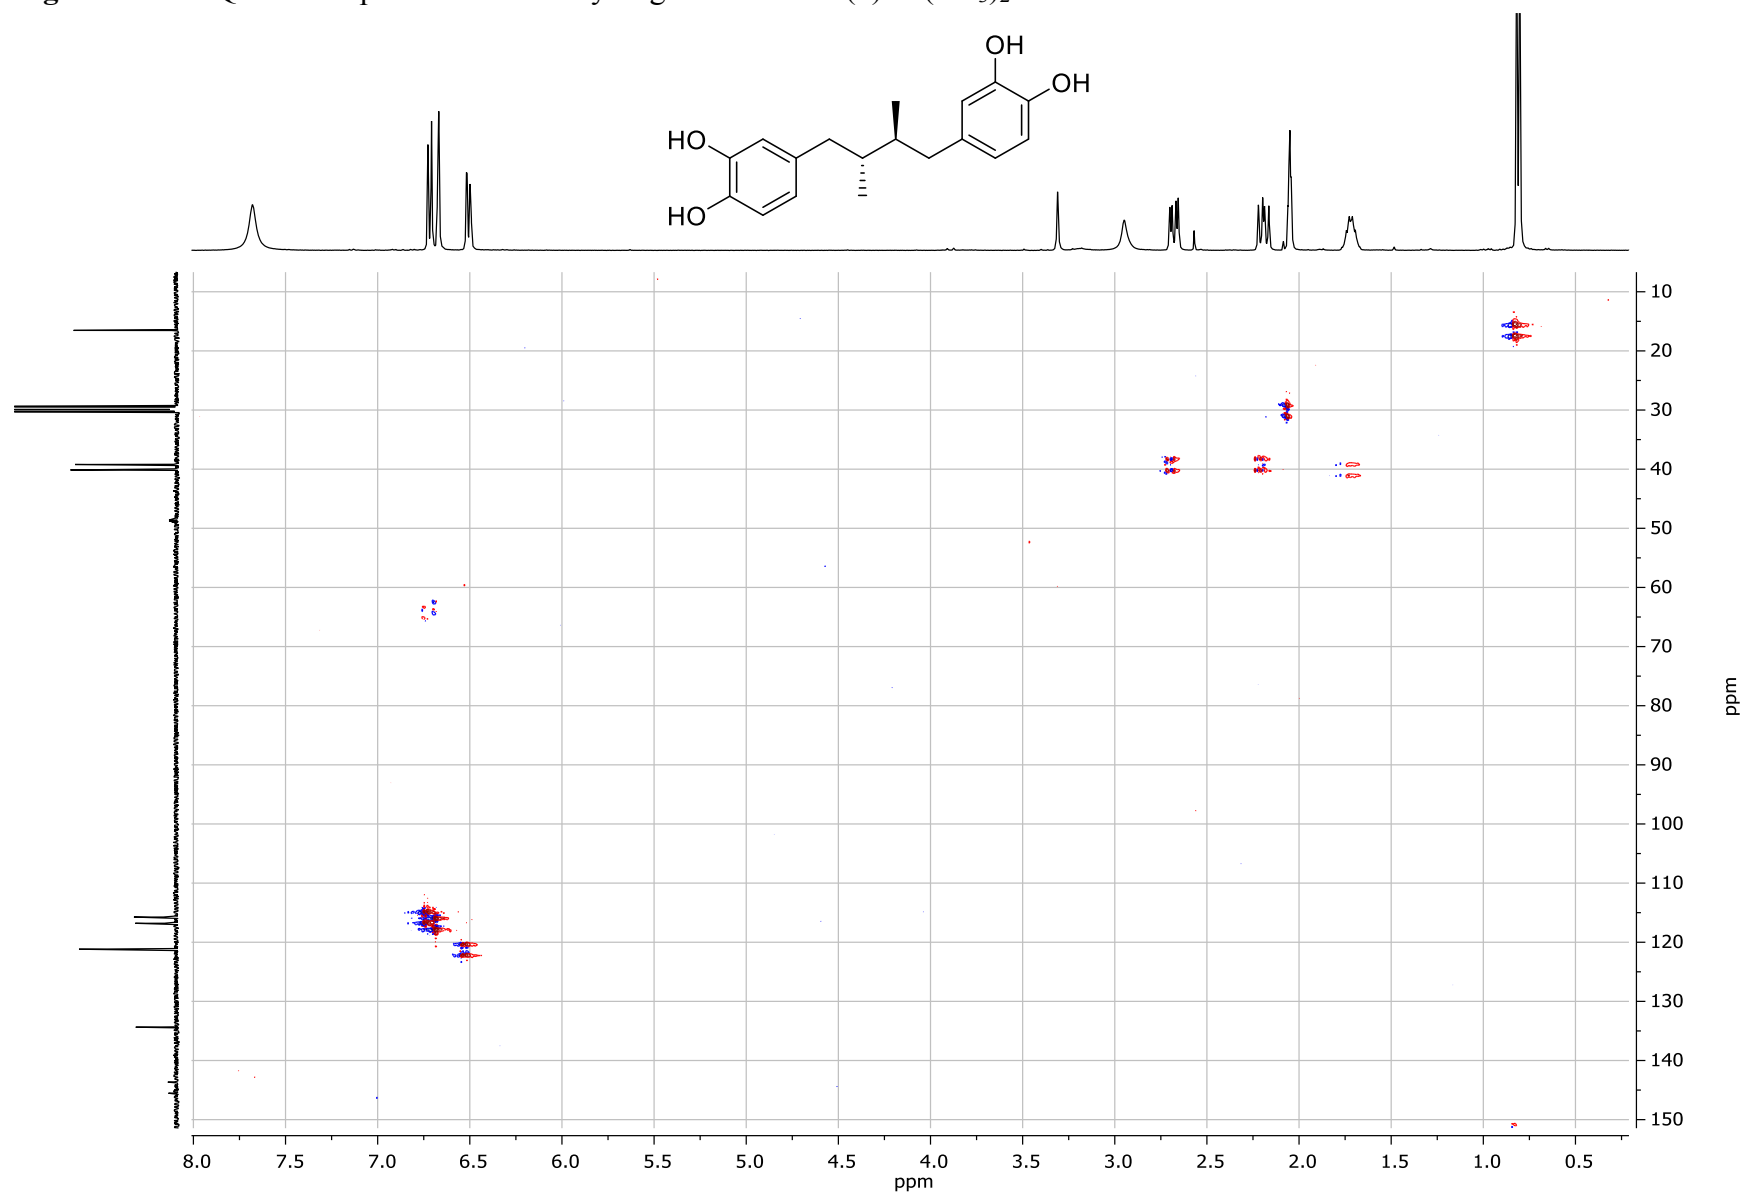

**Figure S4.**  $^1\text{H}$  NMR spectrum of 3'-*O*-methylnordihydroguaiaretic acid (**2**) in  $(\text{CD}_3)_2\text{CO}$

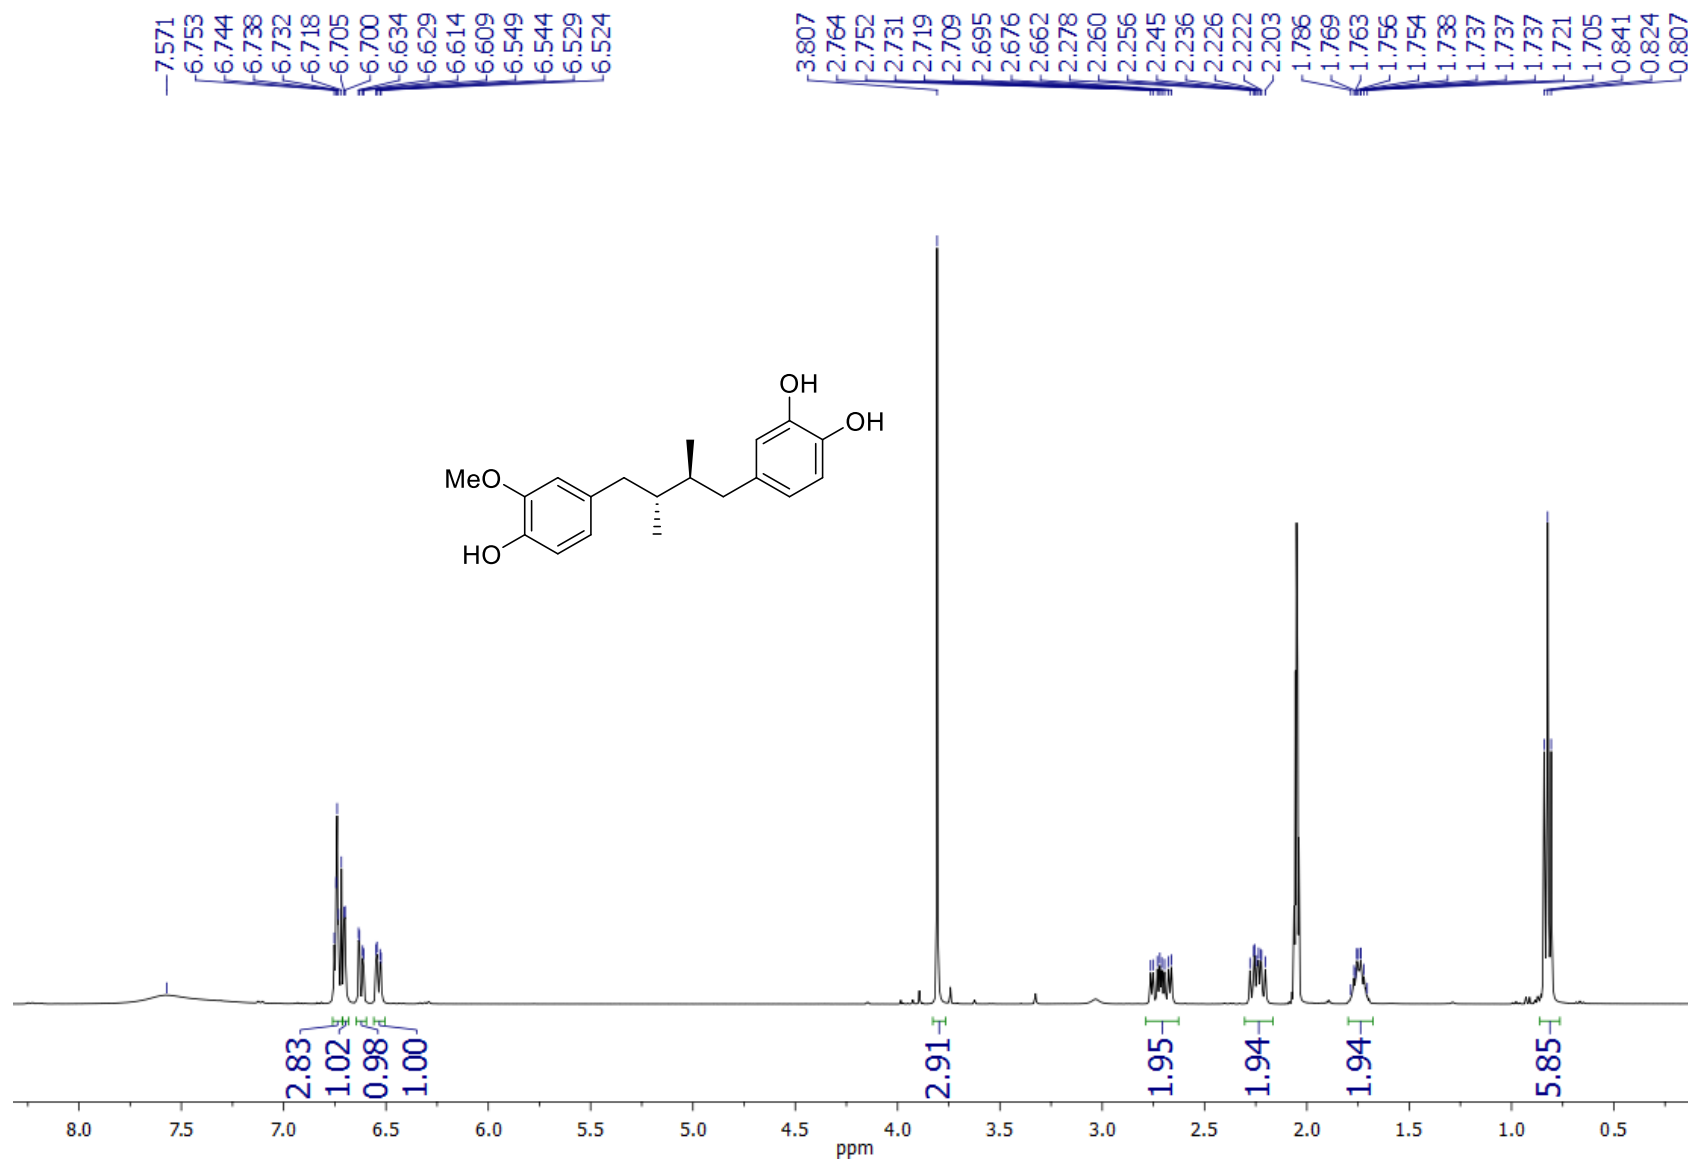

Figure S5.  $^1\text{H}$  NMR spectrum of 3'-*O*-methylnordihydroguaiaretic acid (**2**) in  $\text{CDCl}_3$

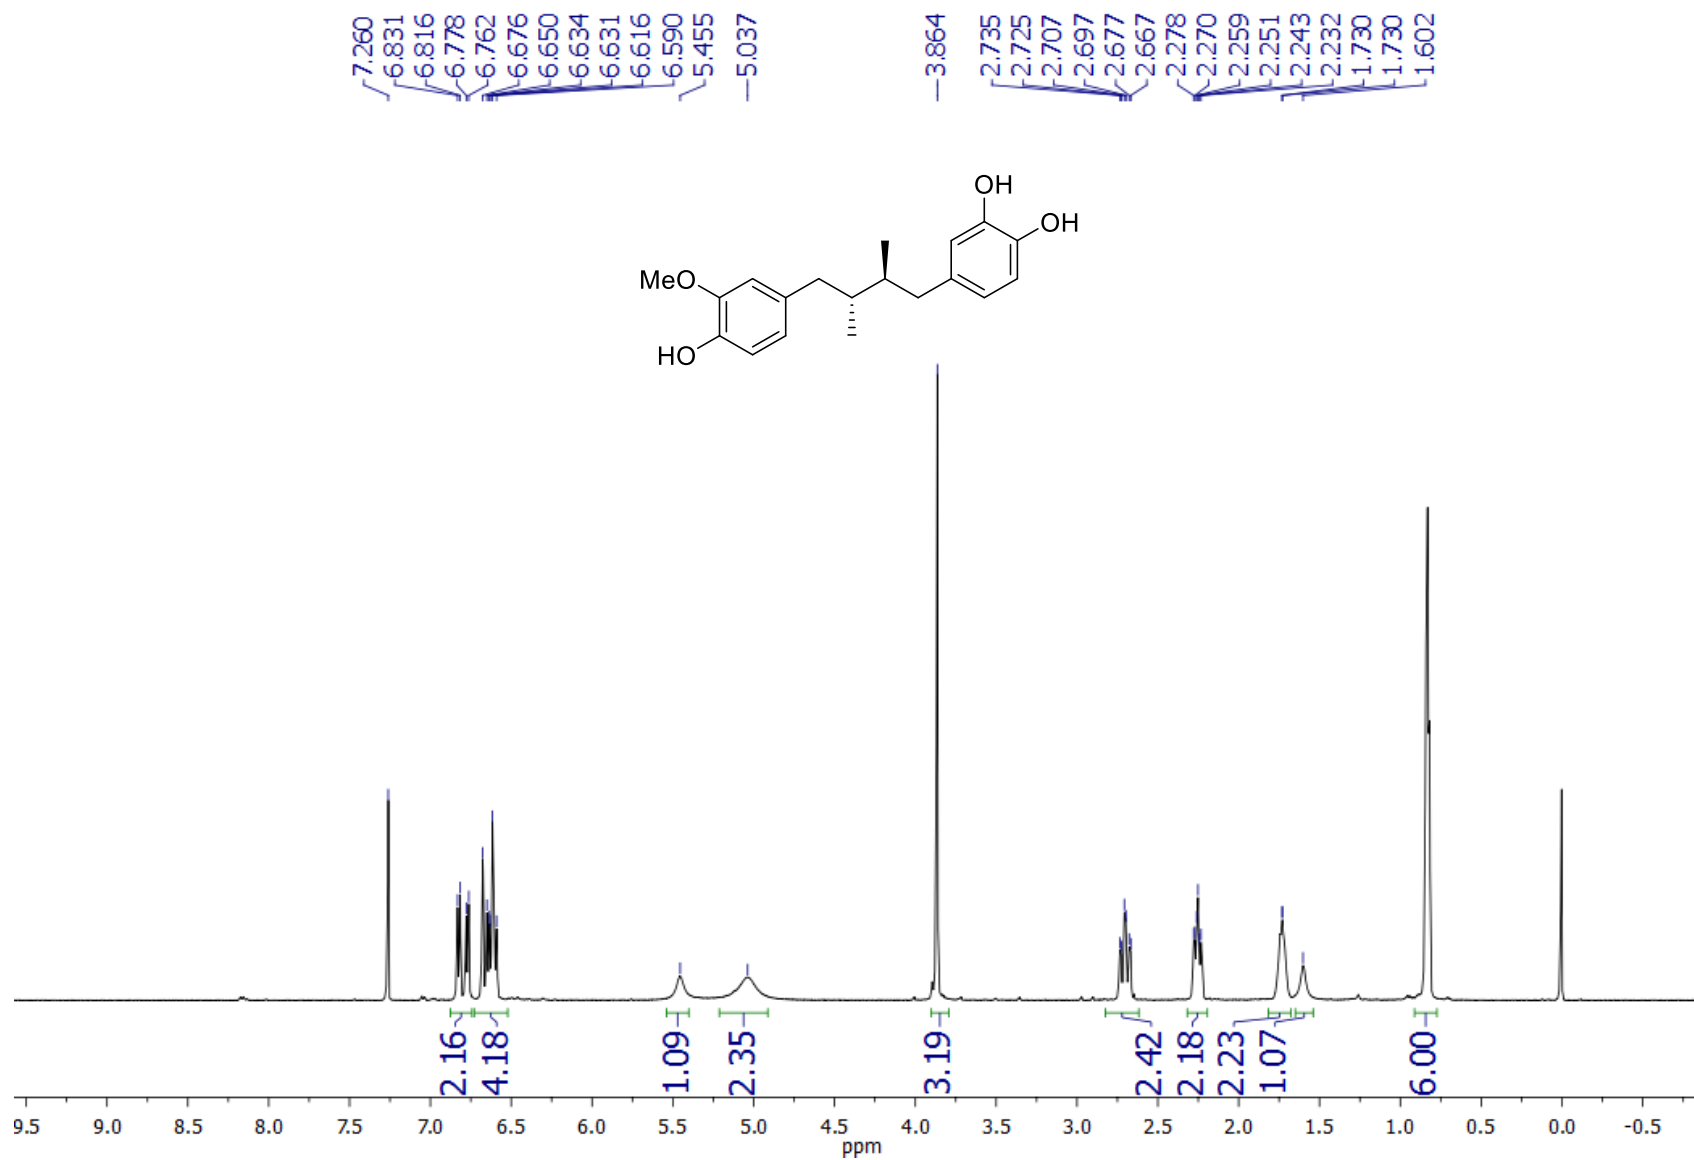

Figure S6.  $^{13}\text{C}$  NMR spectrum of 3'-*O*-methylnordihydroguaiaretic acid (**2**) in  $(\text{CD}_3)_2\text{CO}$

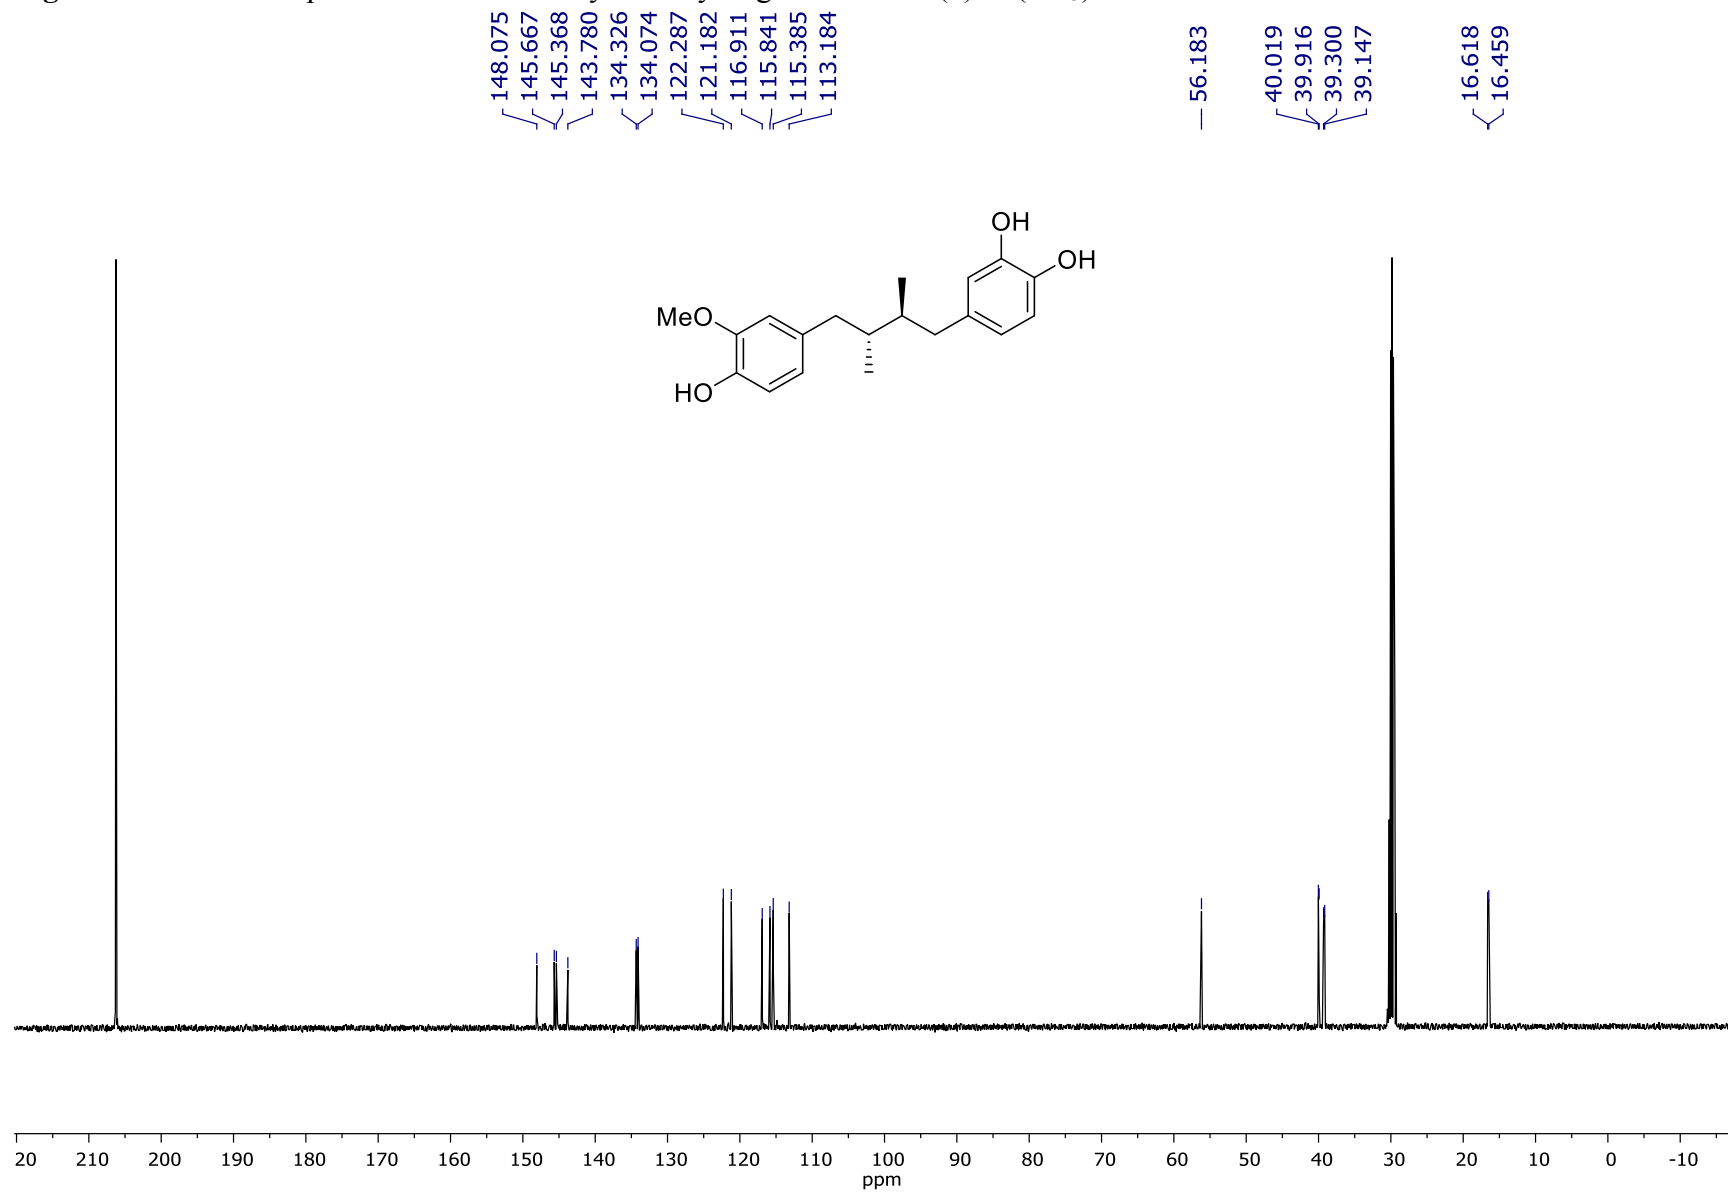

Figure S7.  $^{13}\text{C}$  DEPT-135 NMR spectrum of 3'-*O*-methylnordihydroguaiaretic acid (**2**) in  $(\text{CD}_3)_2\text{CO}$

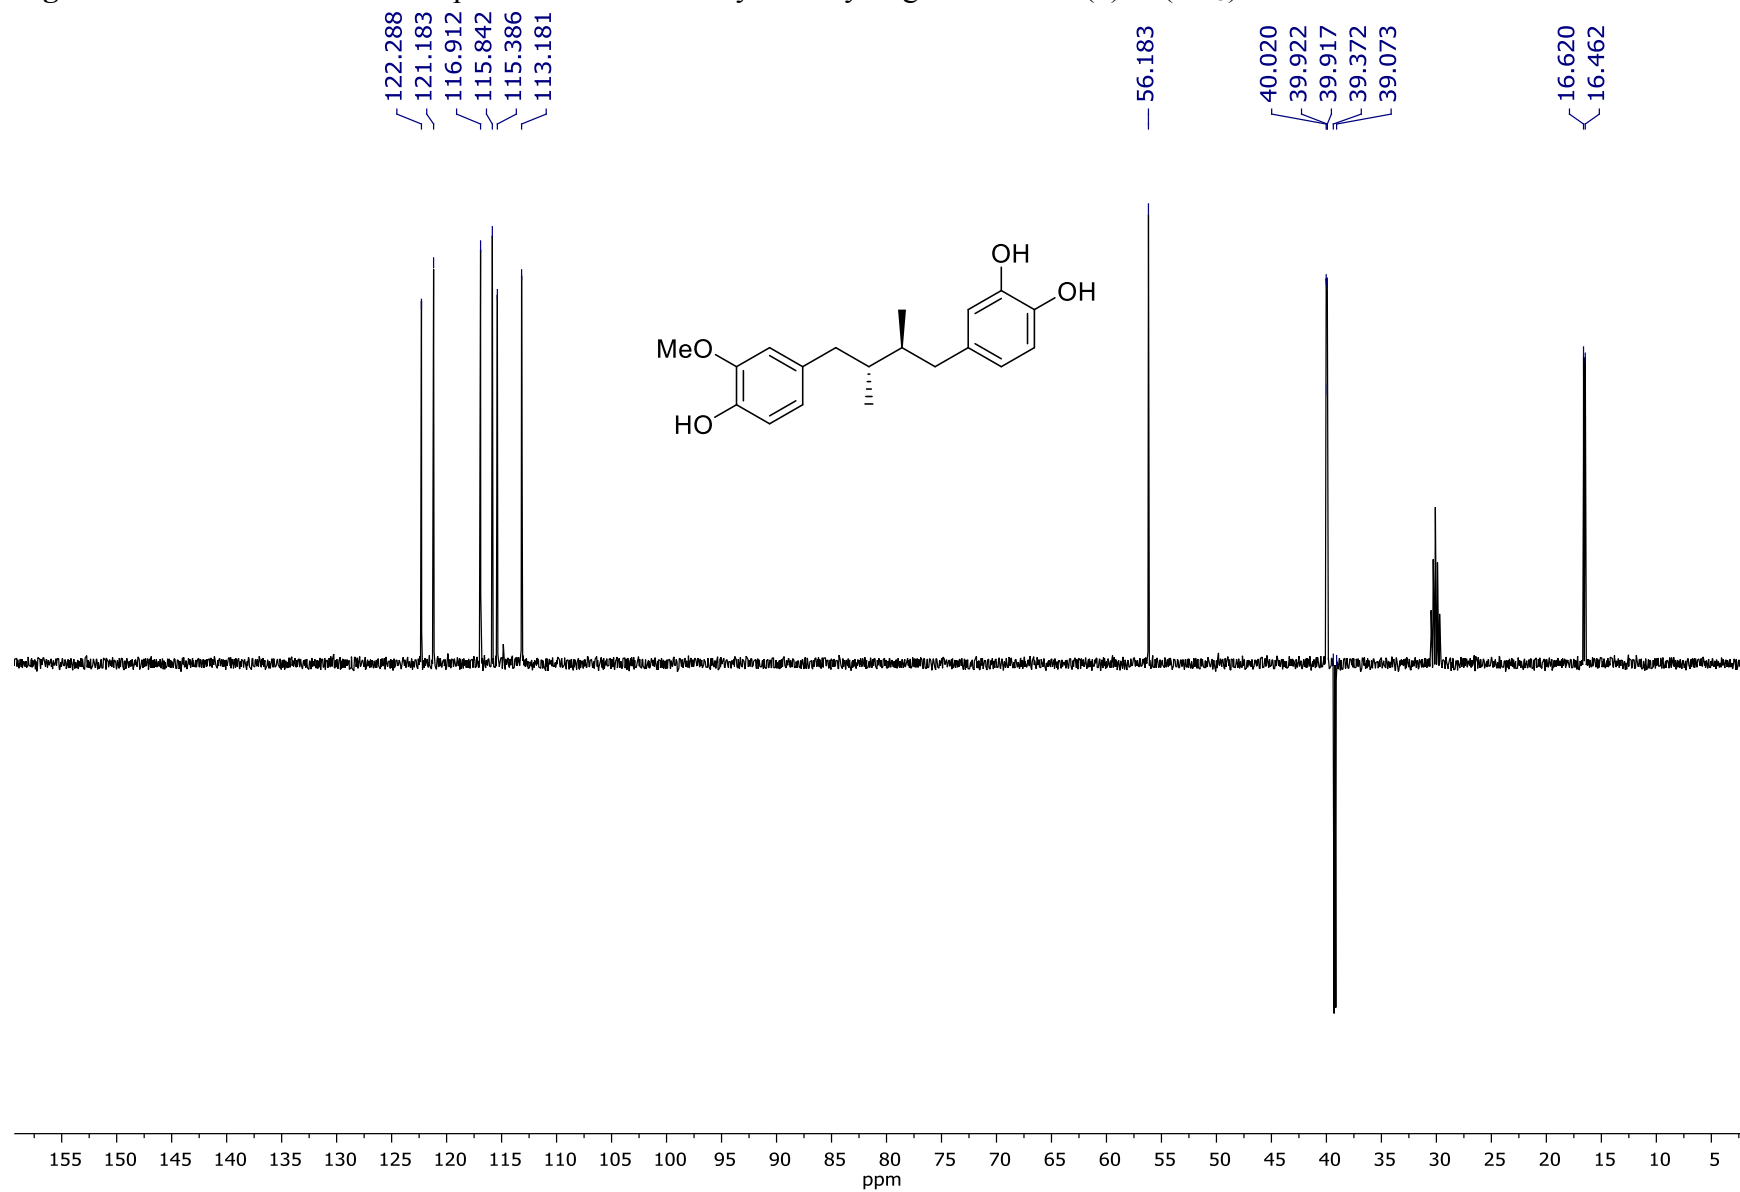



**Figure S8.** HMQC NMR spectrum of 3'-*O*-methylnordihydroguairetic acid (**2**) in (CD<sub>3</sub>)<sub>2</sub>CO

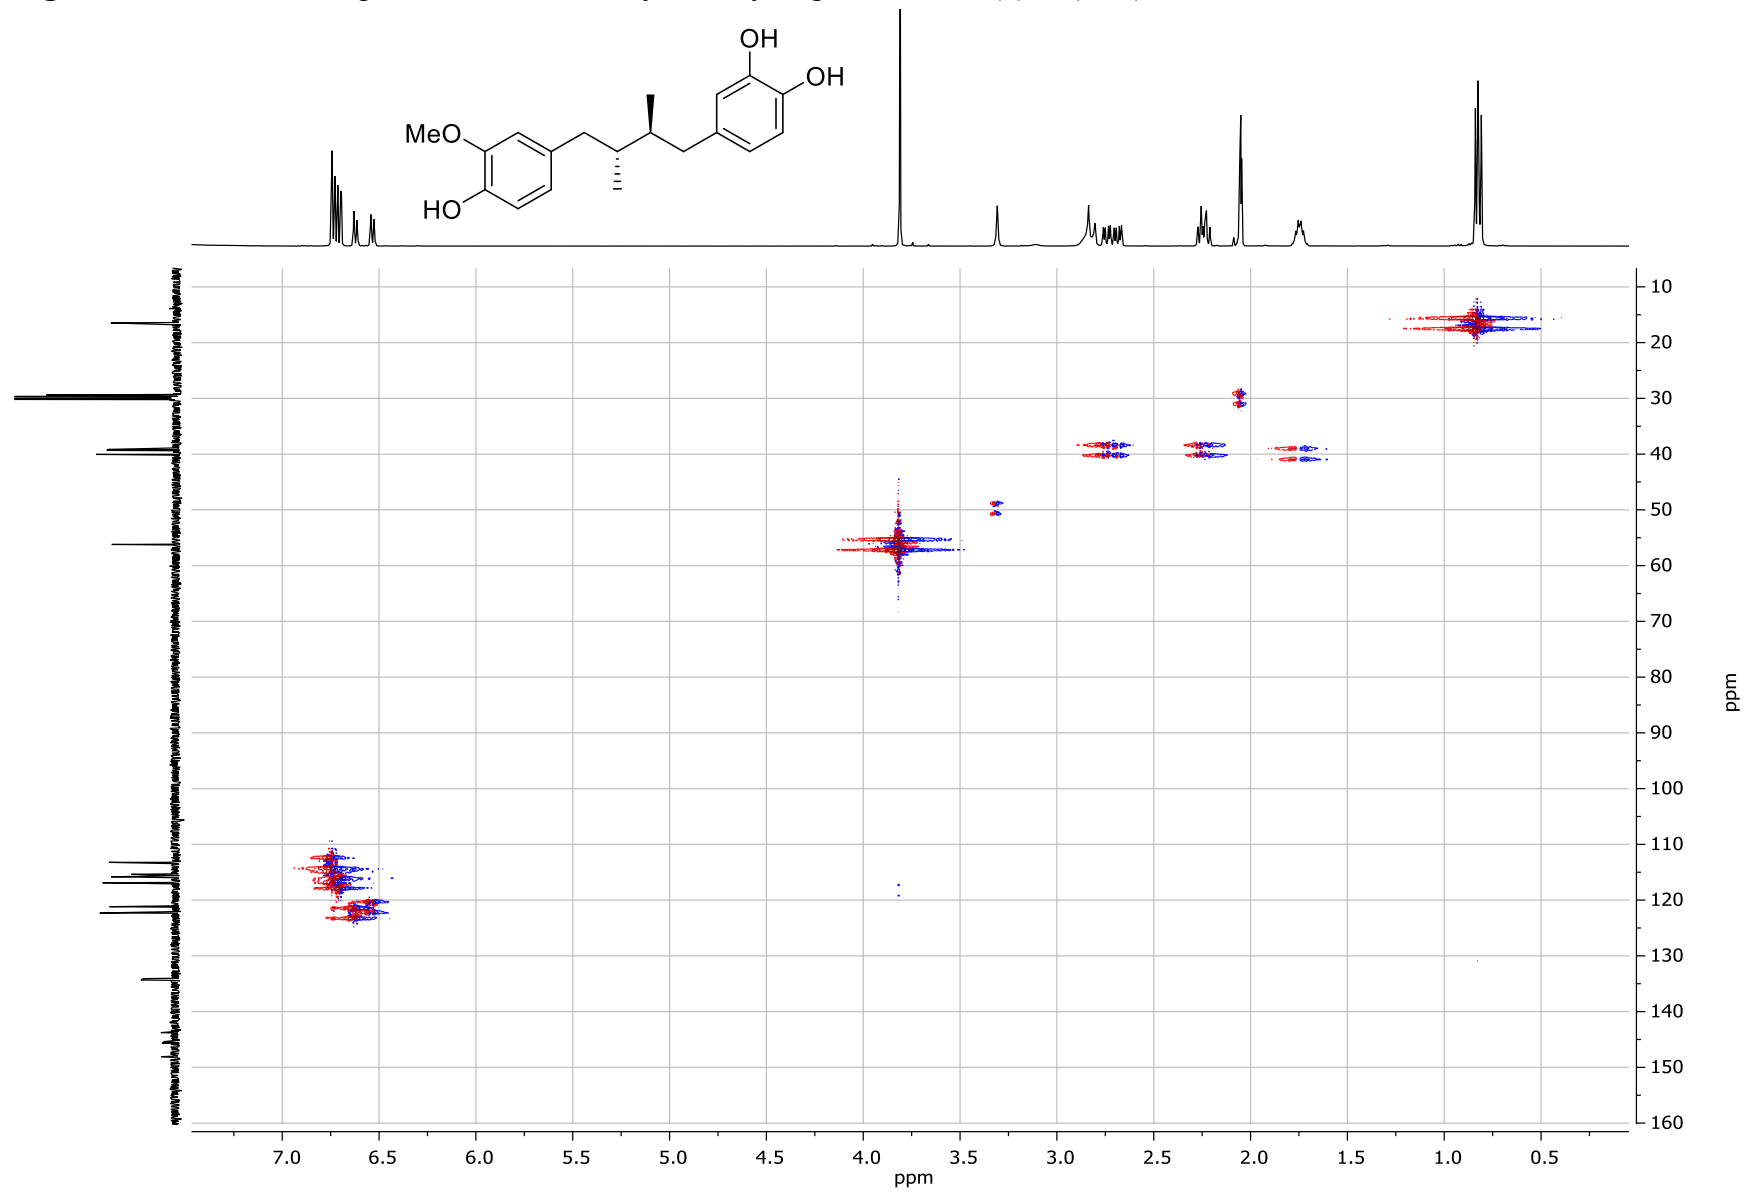

Figure S9. <sup>1</sup>H NMR spectrum of 3'-demethoxy-6-O-demethylisoguaiacin (**3**) in (CD<sub>3</sub>)<sub>2</sub>CO

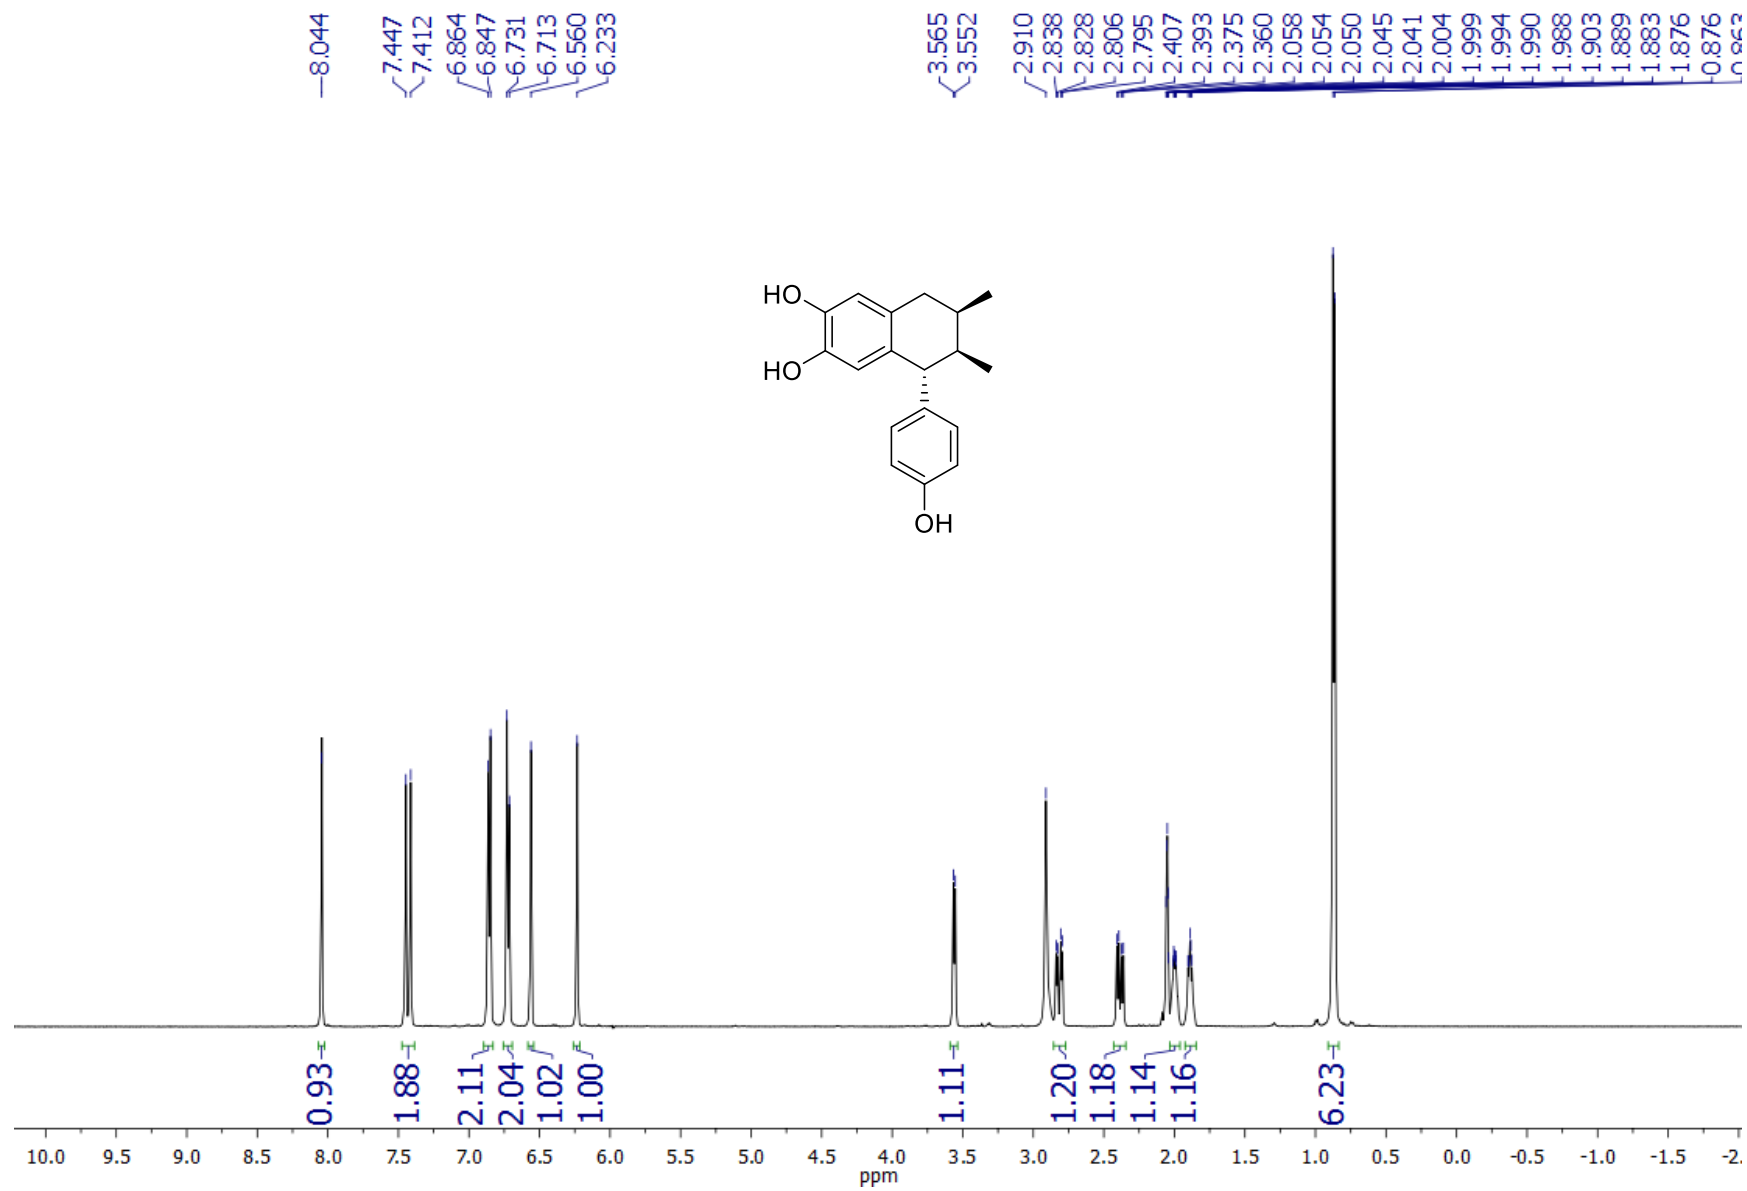

**Figure S10.**  $^1\text{H}$  NMR spectrum of 3'-demethoxy-6-*O*-demethylisoguaiacin (**3**) in  $\text{CDCl}_3$

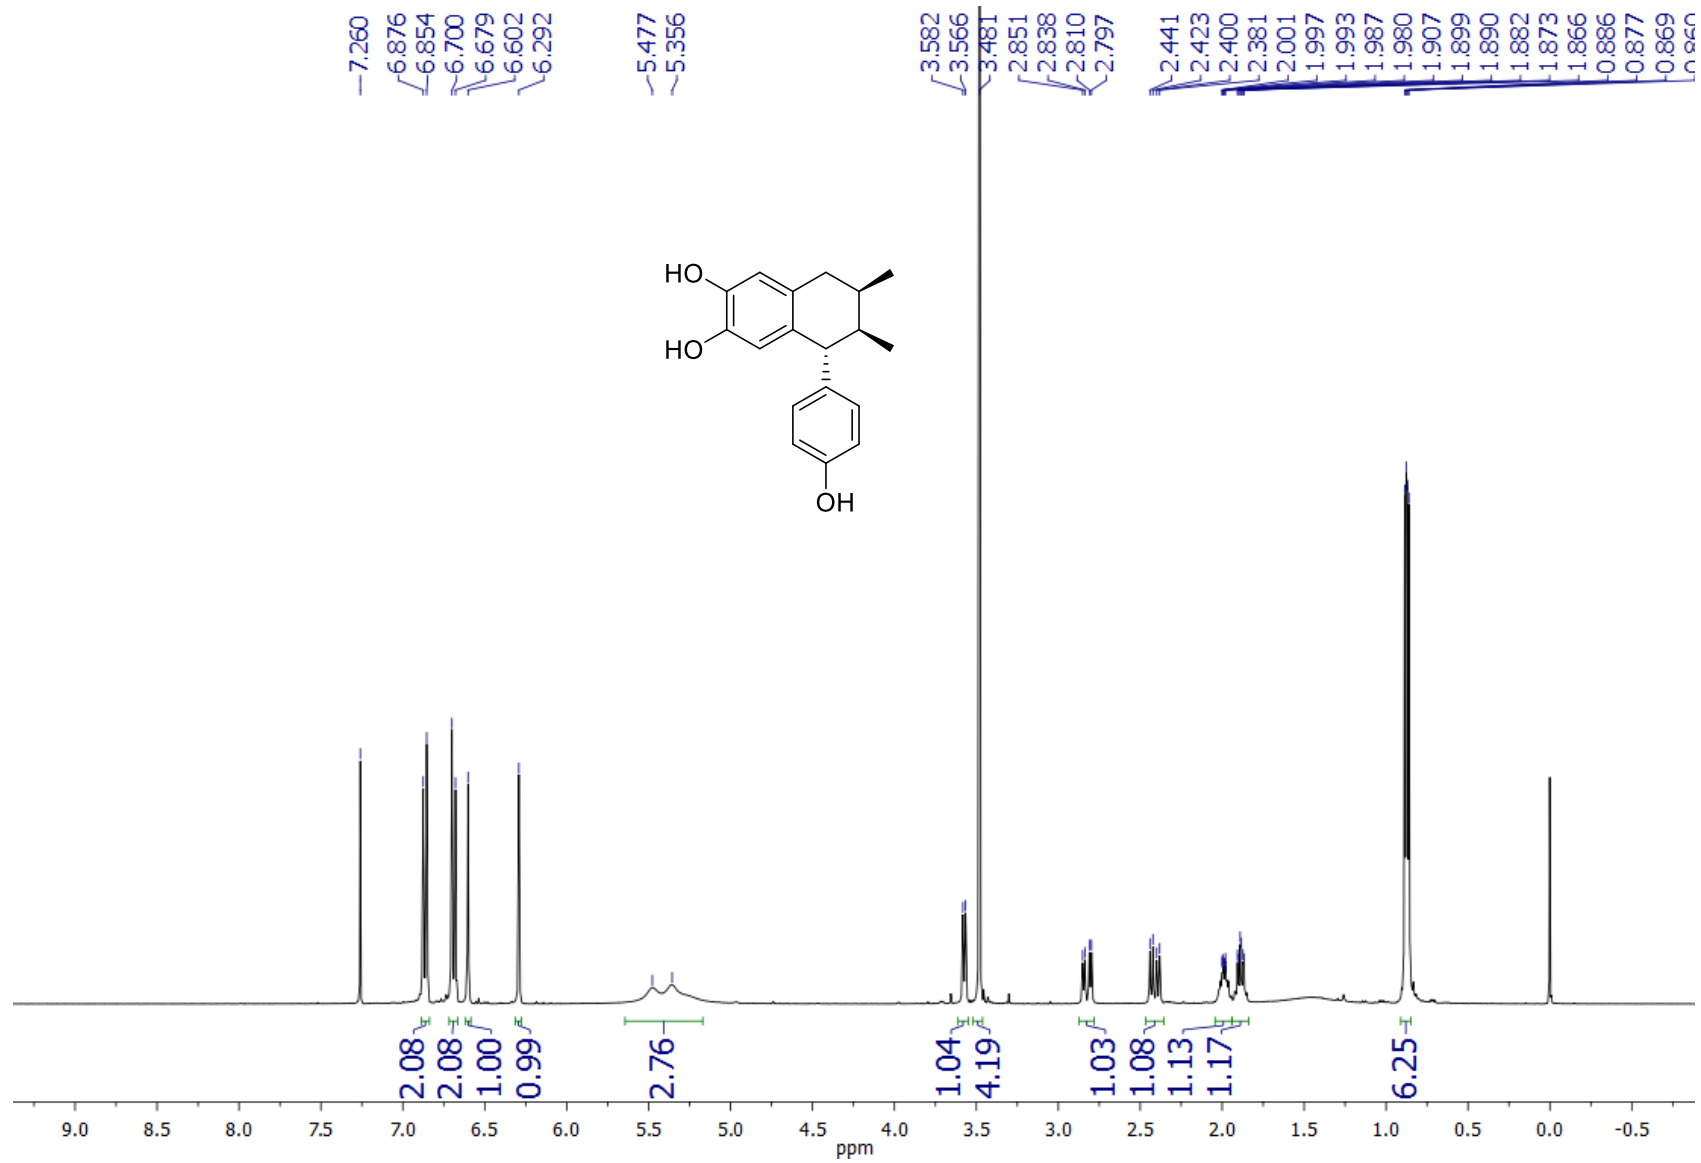

**Figure S11.**  $^{13}\text{C}$  NMR spectrum of 3'-demethoxy-6-*O*-demethylisoguaiacin (**3**) in  $(\text{CD}_3)_2\text{CO}$

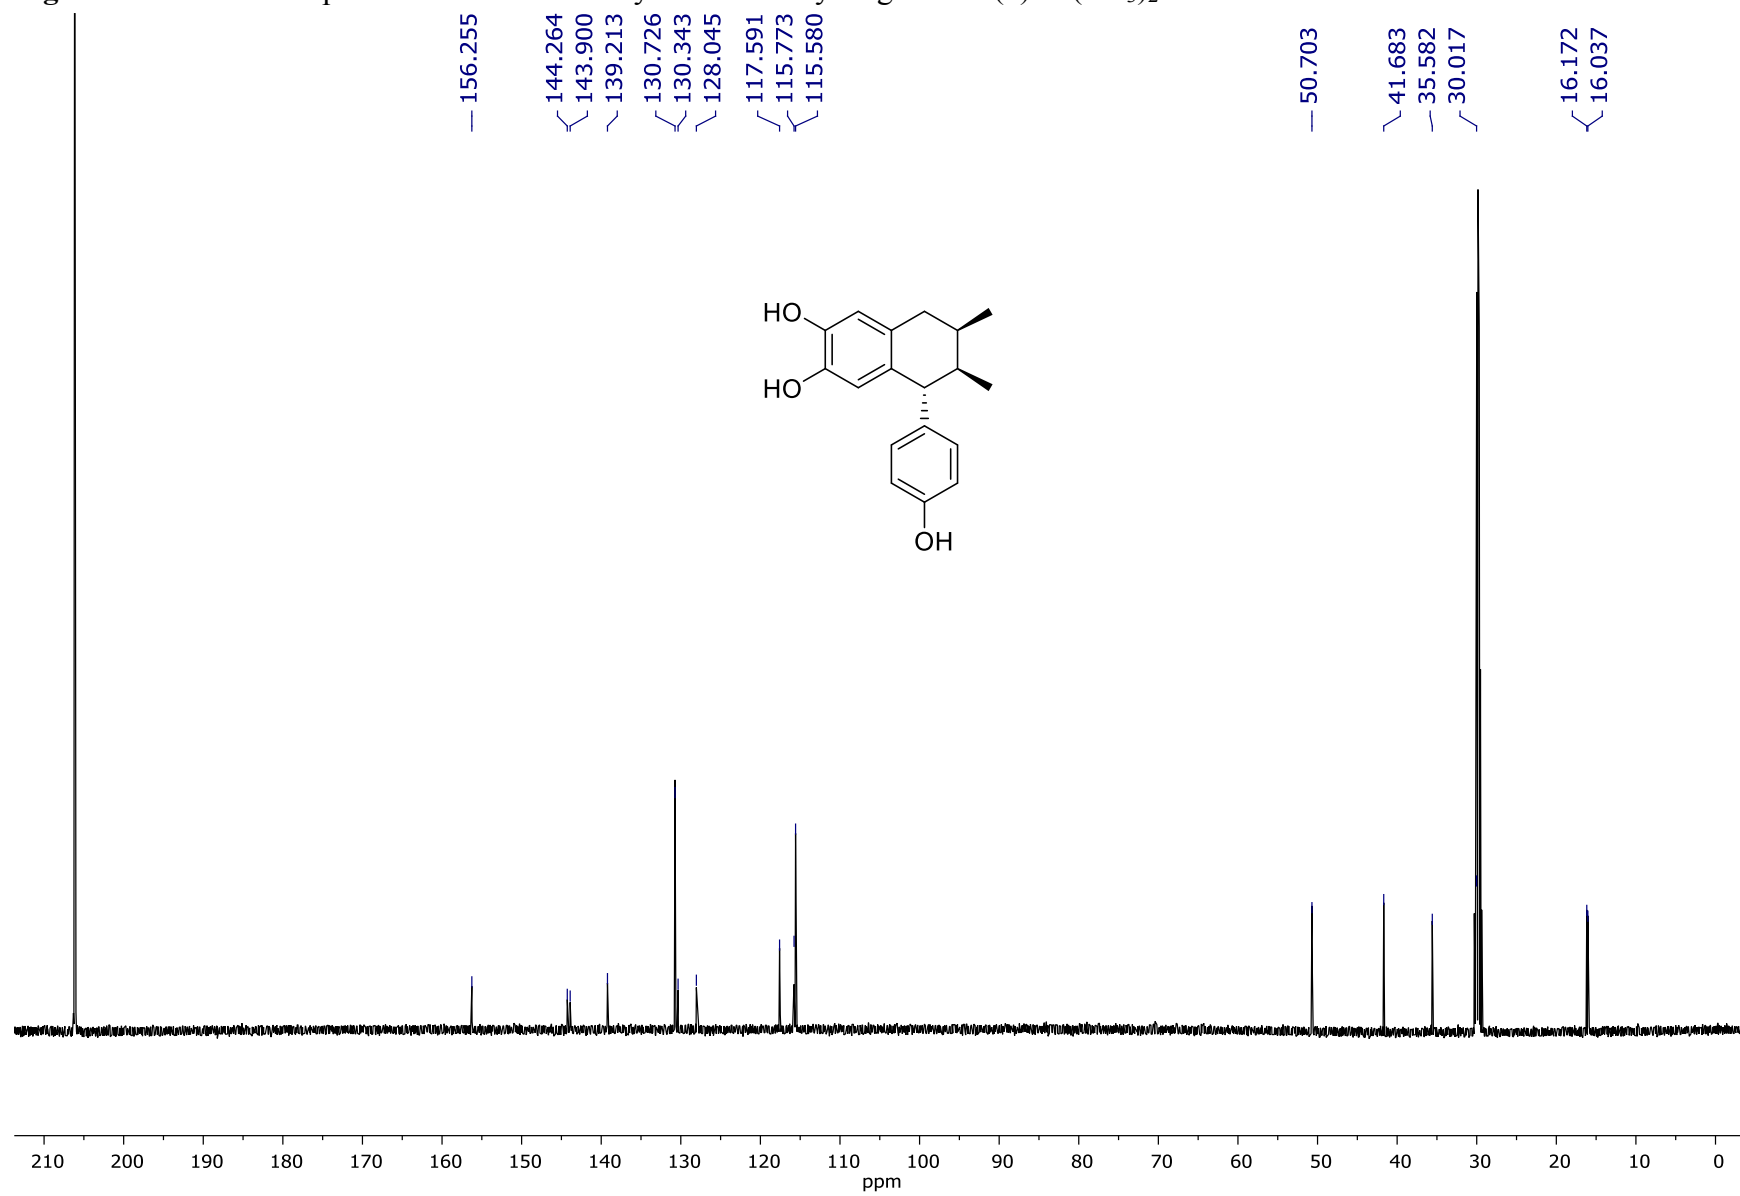

**Figure S12.** HMQC spectrum of 3'-demethoxy-6-*O*-demethylisoguaiacin (**3**) in (CD<sub>3</sub>)<sub>2</sub>CO

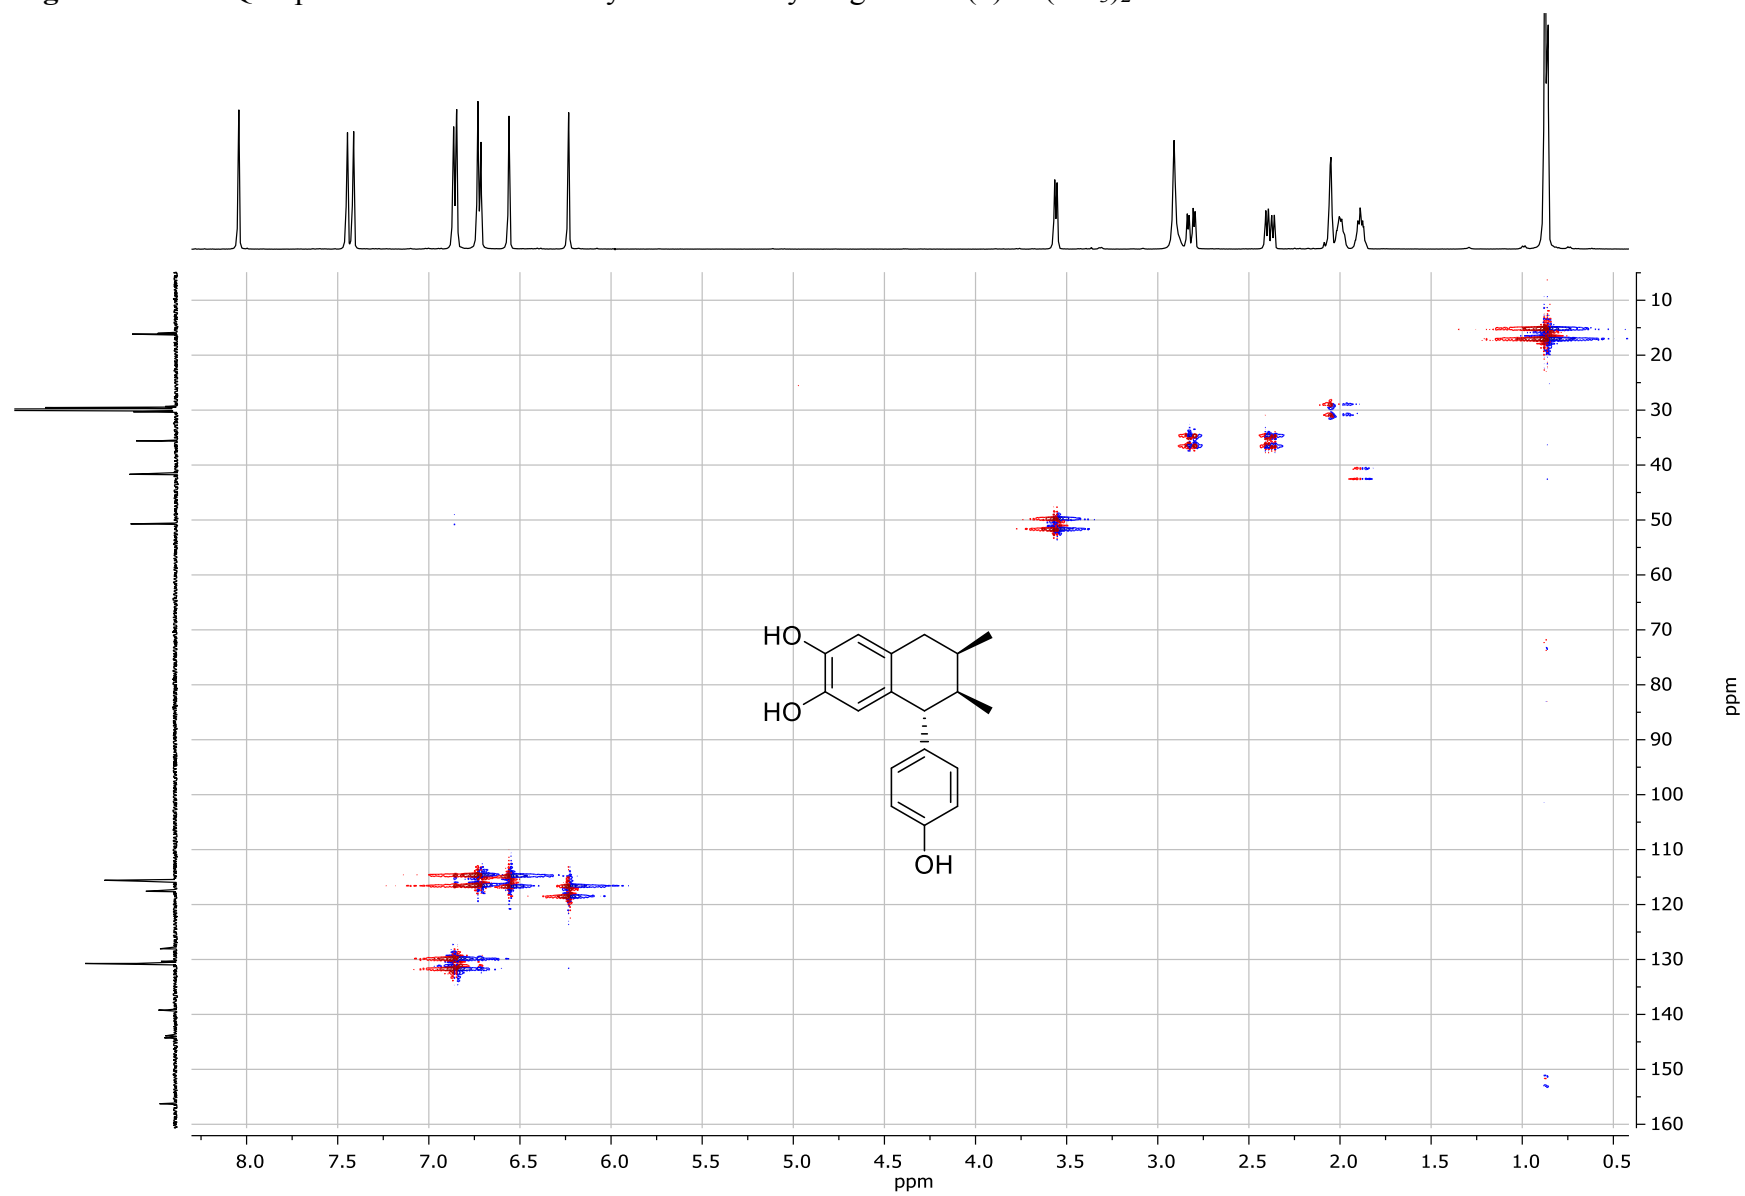

**Figure S13.** HMBC spectrum of 3'-demethoxy-6-*O*-demethylisoguaiacin (**3**) in (CD<sub>3</sub>)<sub>2</sub>CO

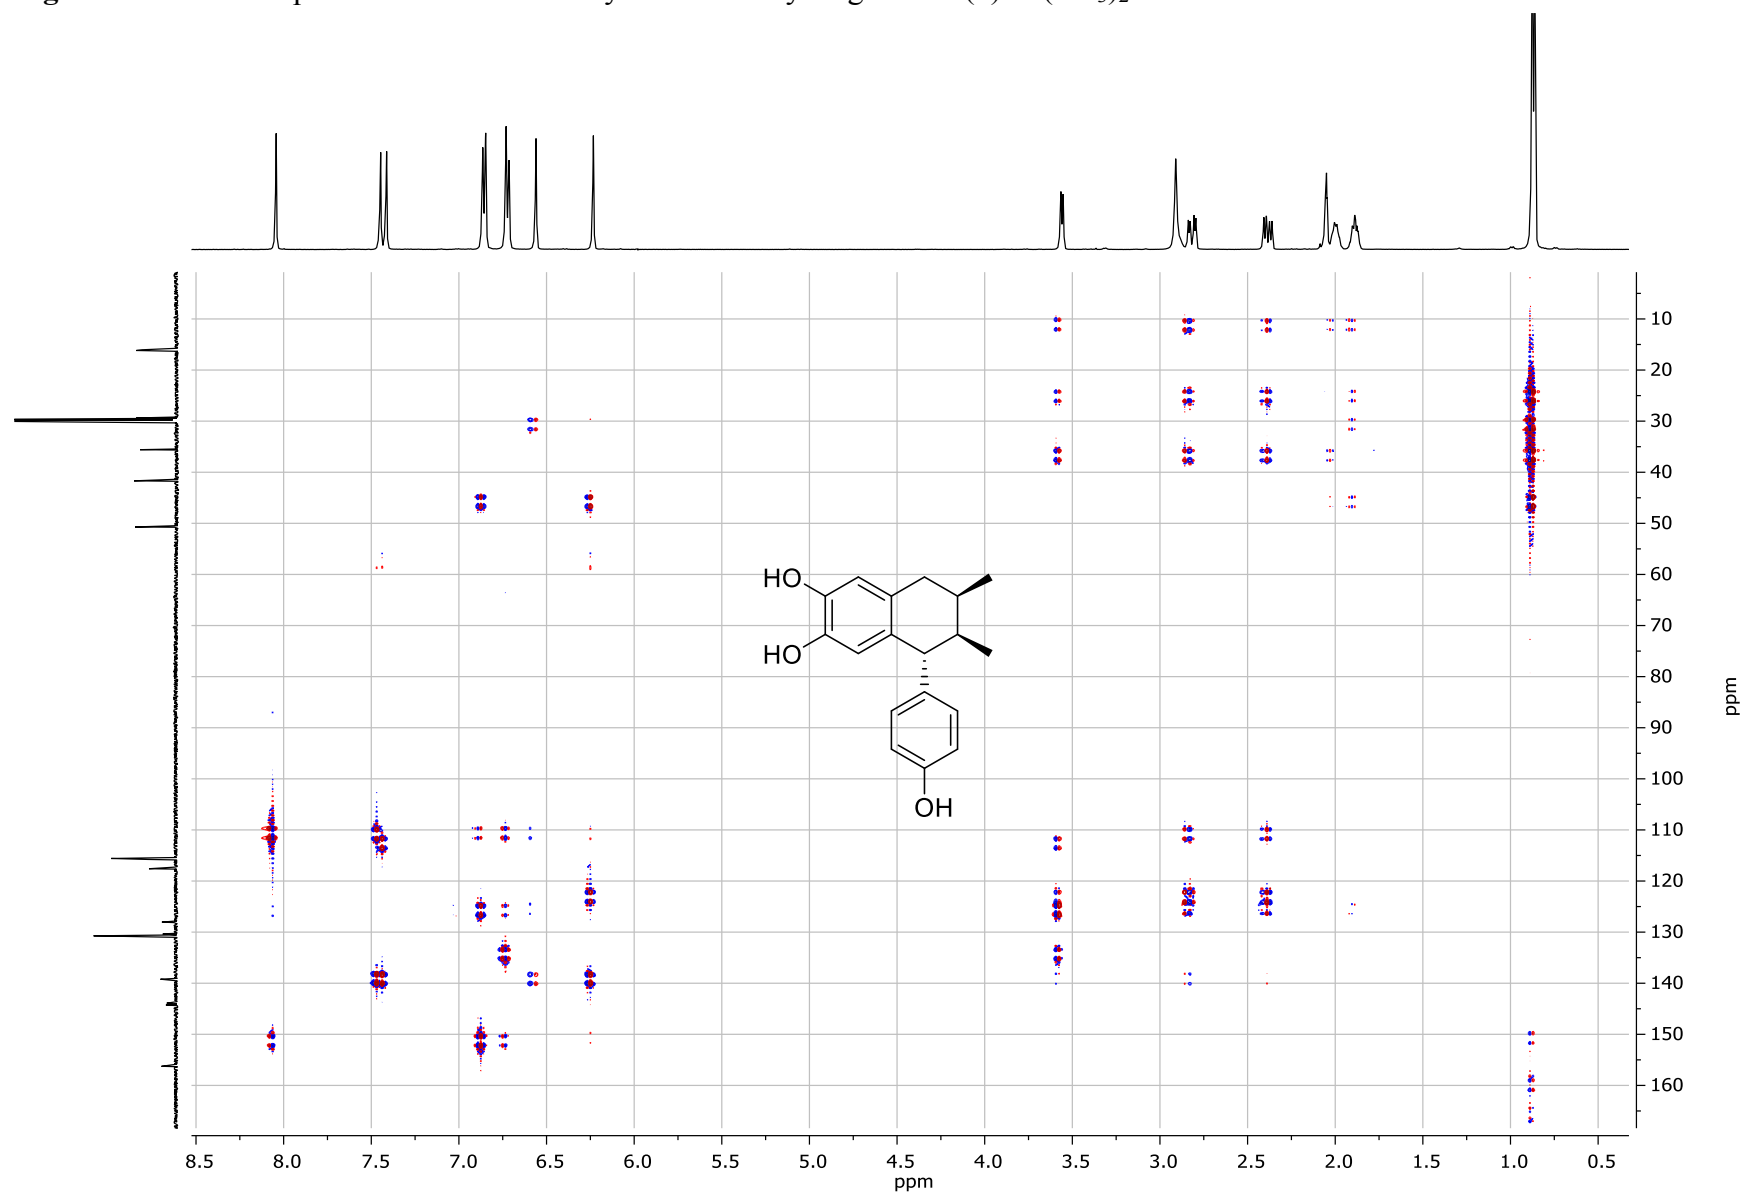

Figure S14. <sup>1</sup>H NMR spectrum of nor-isogaucin (4) in (CD<sub>3</sub>)<sub>2</sub>CO

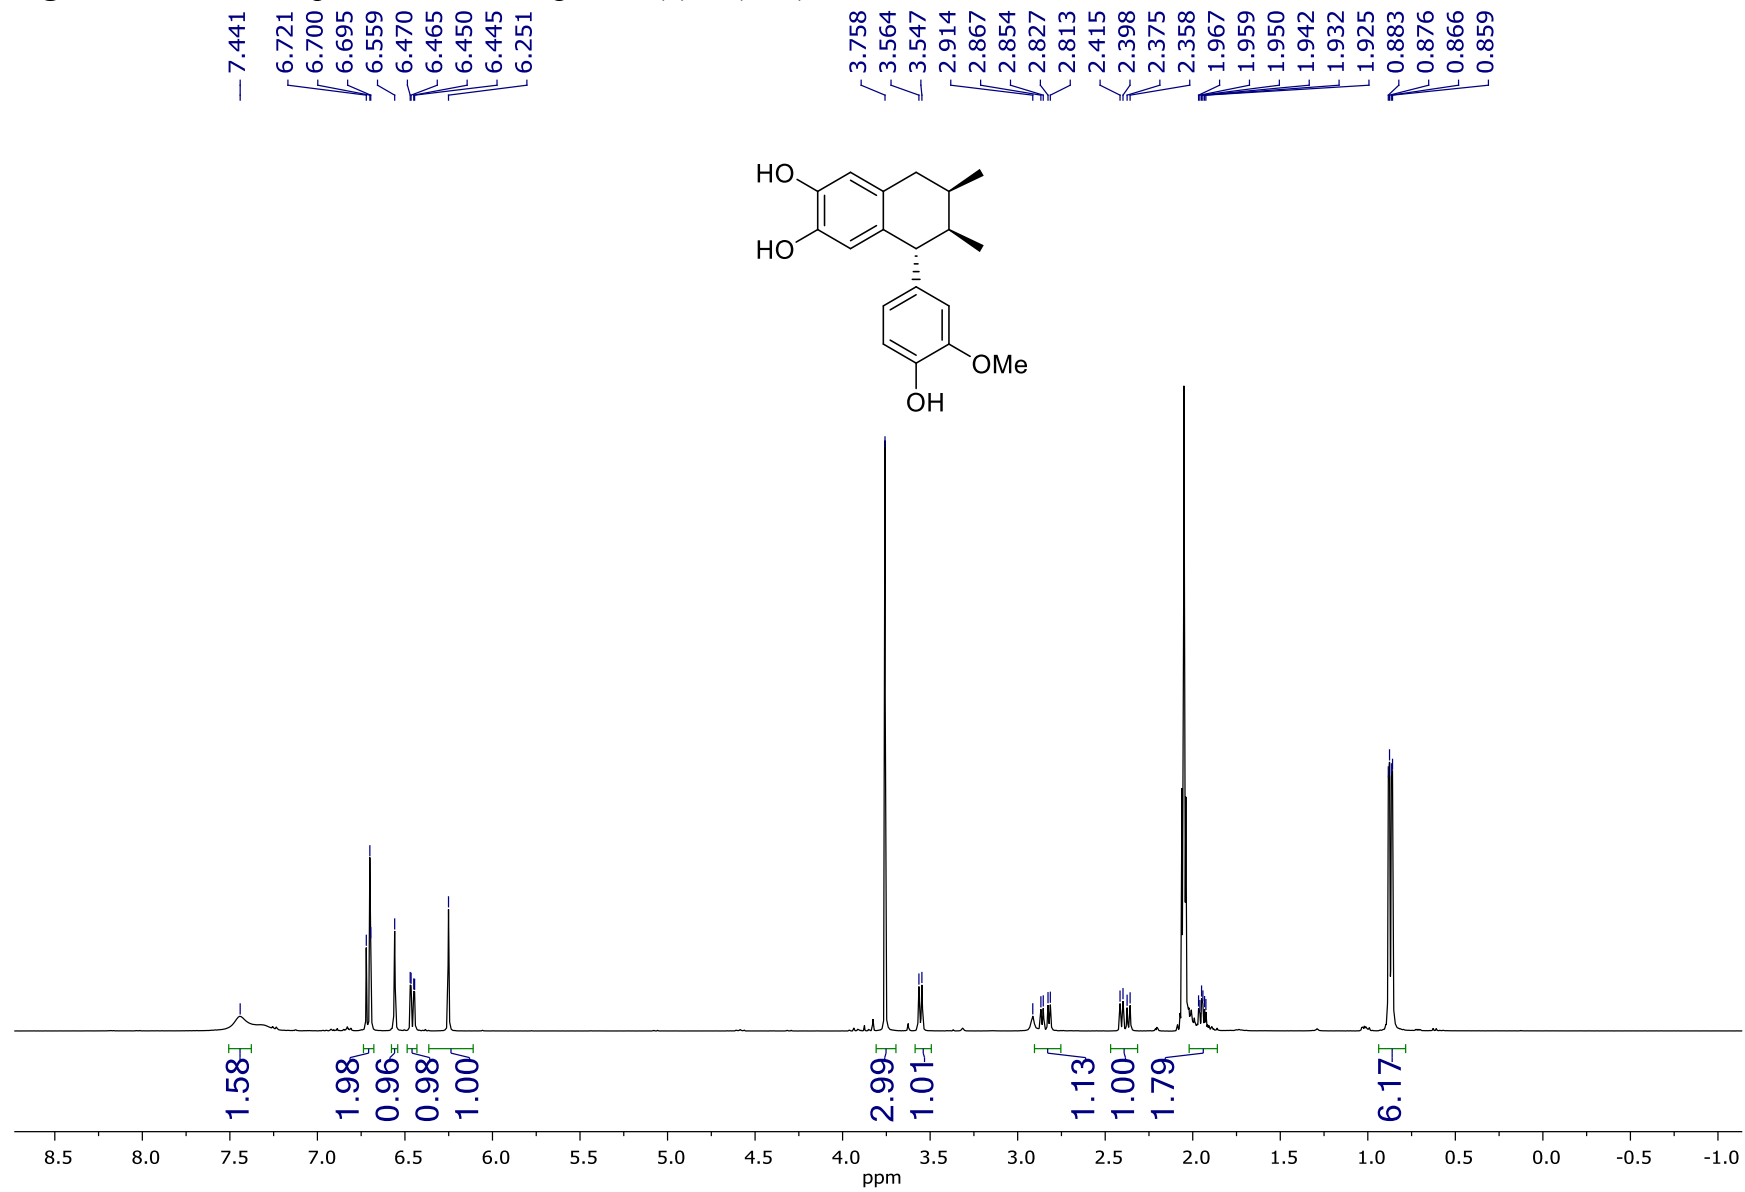

Figure S15. <sup>1</sup>H NMR spectrum of nor-isogaicic acid (4) in CDCl<sub>3</sub>

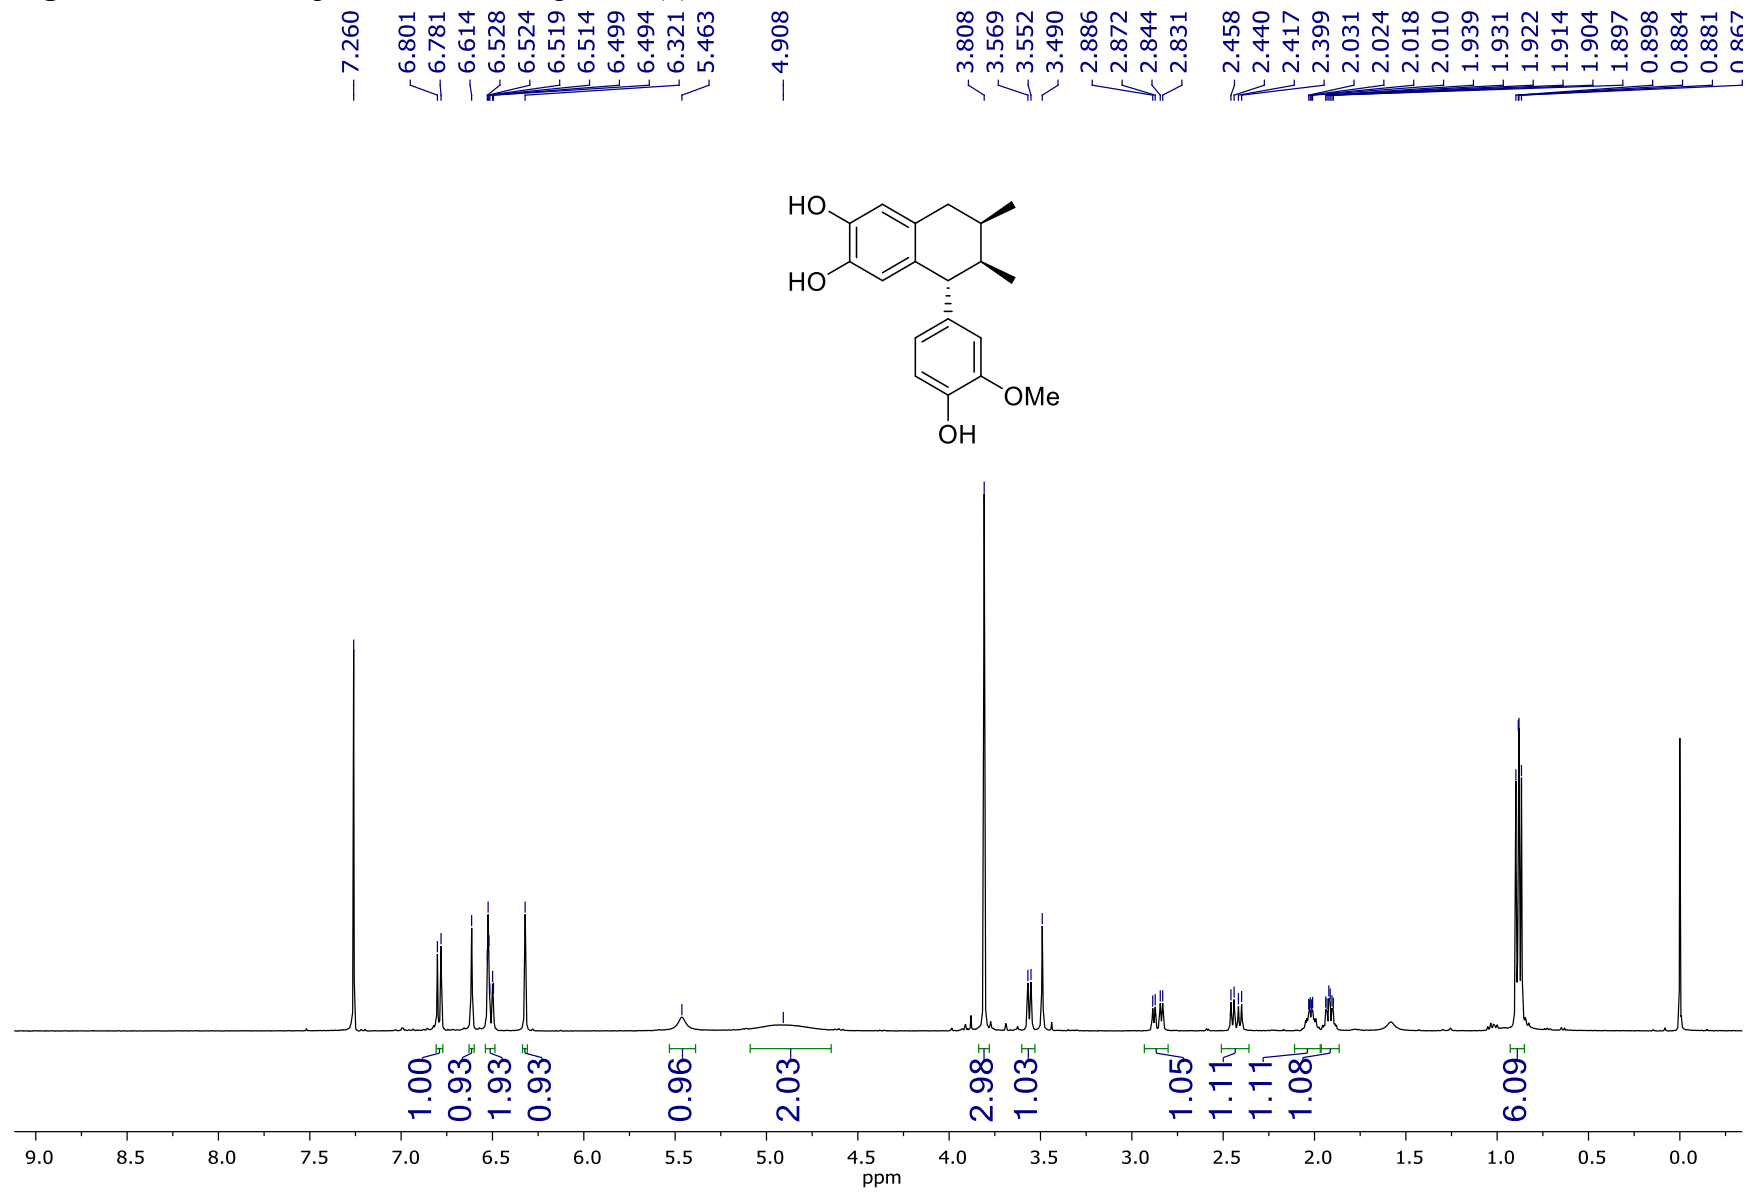



Figure S16.  $^{13}\text{C}$  NMR spectrum of nor-isogaucin (**4**) in  $(\text{CD}_3)_2\text{CO}$

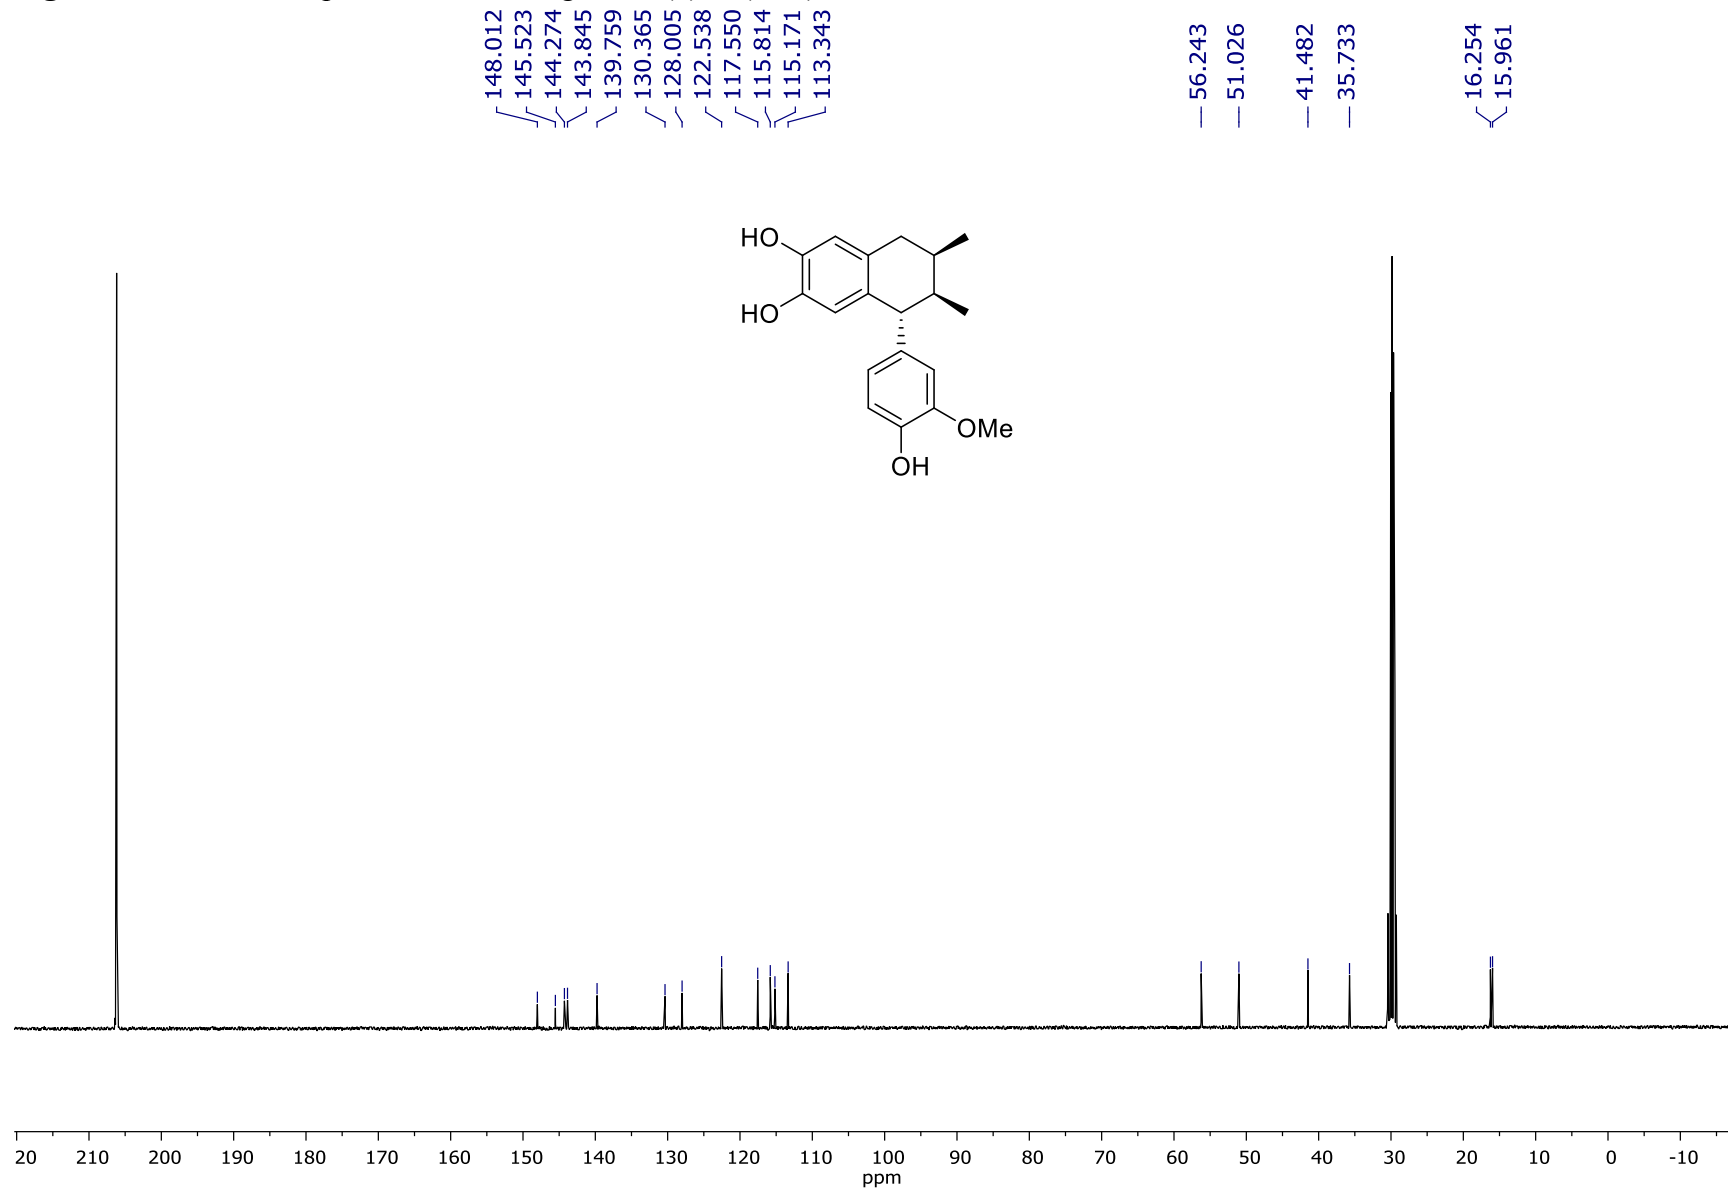

Figure S17.  $^{13}\text{C}$  DEPT 135 NMR spectrum of nor-isogaicin (**4**) in  $(\text{CD}_3)_2\text{CO}$

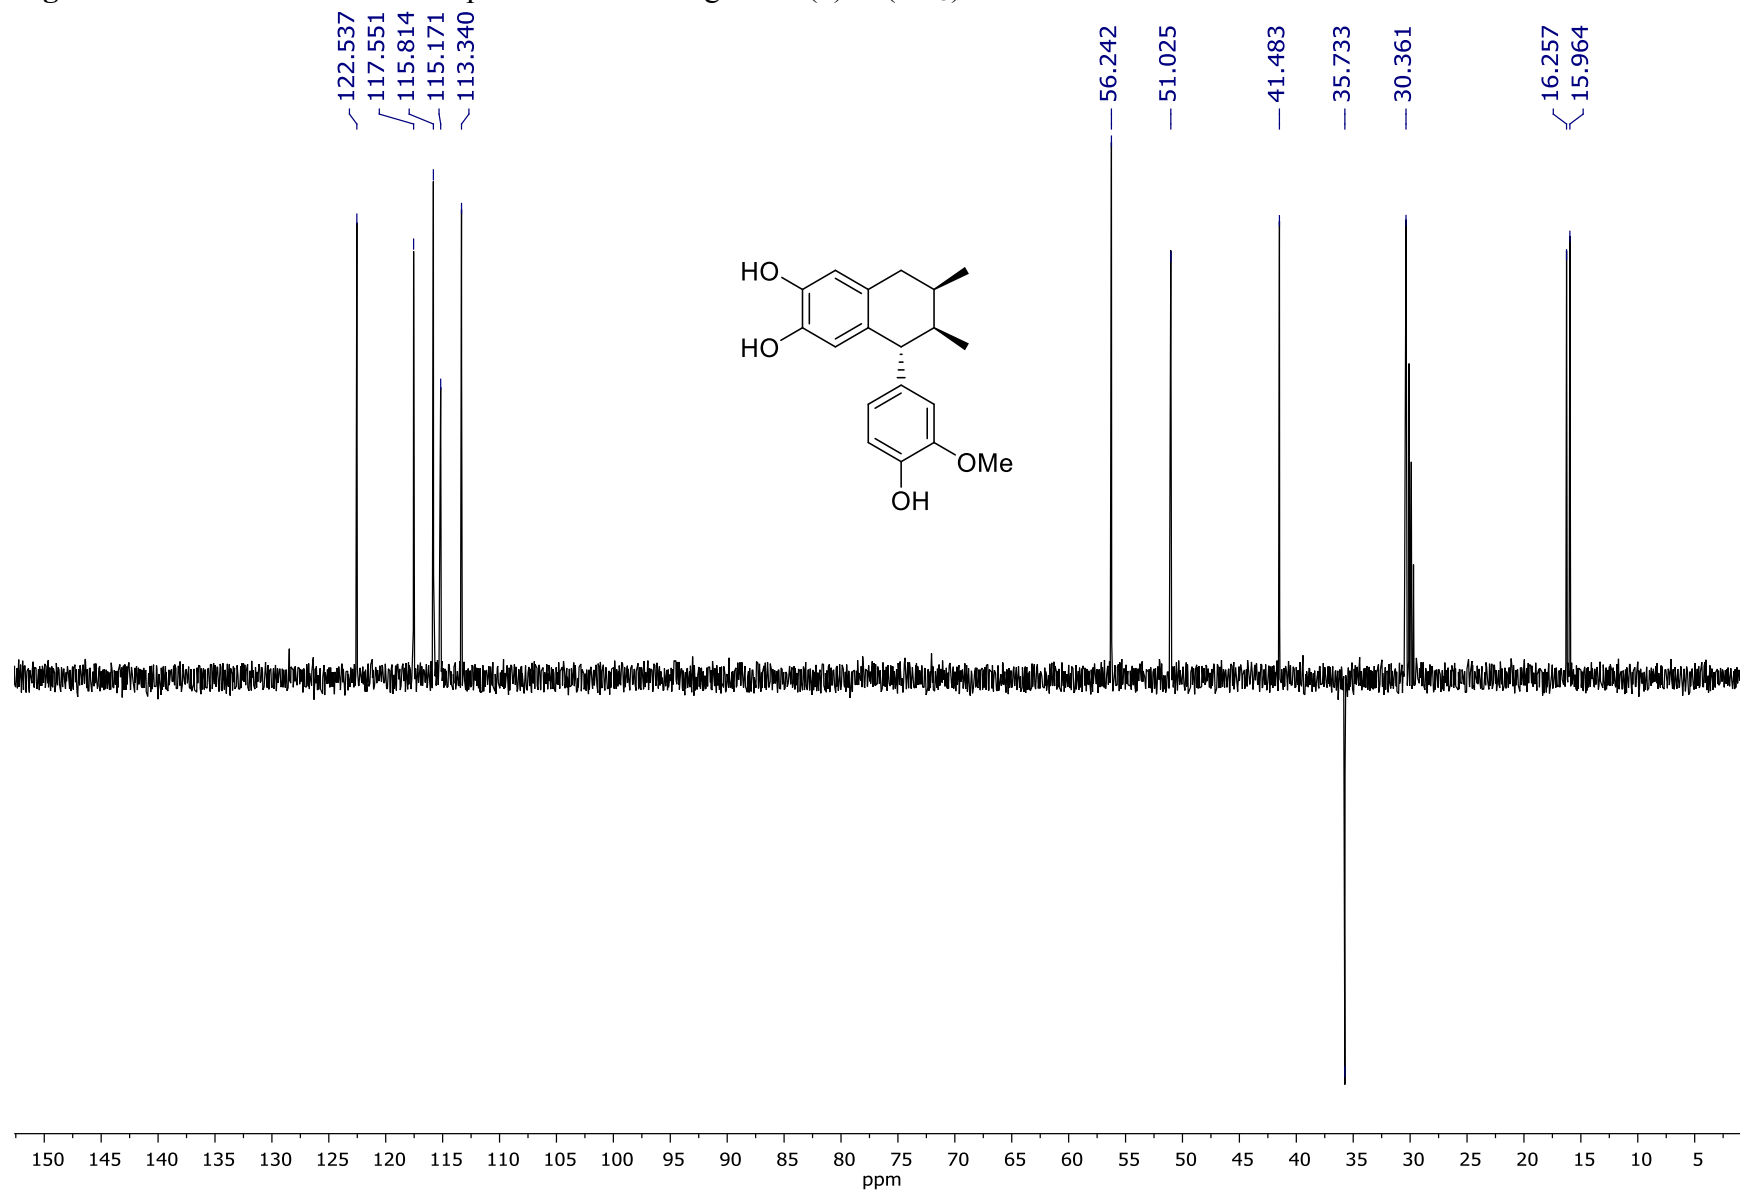

Figure S18. HMQC NMR spectrum of nor-isogaicin (4) in  $(\text{CD}_3)_2\text{CO}$

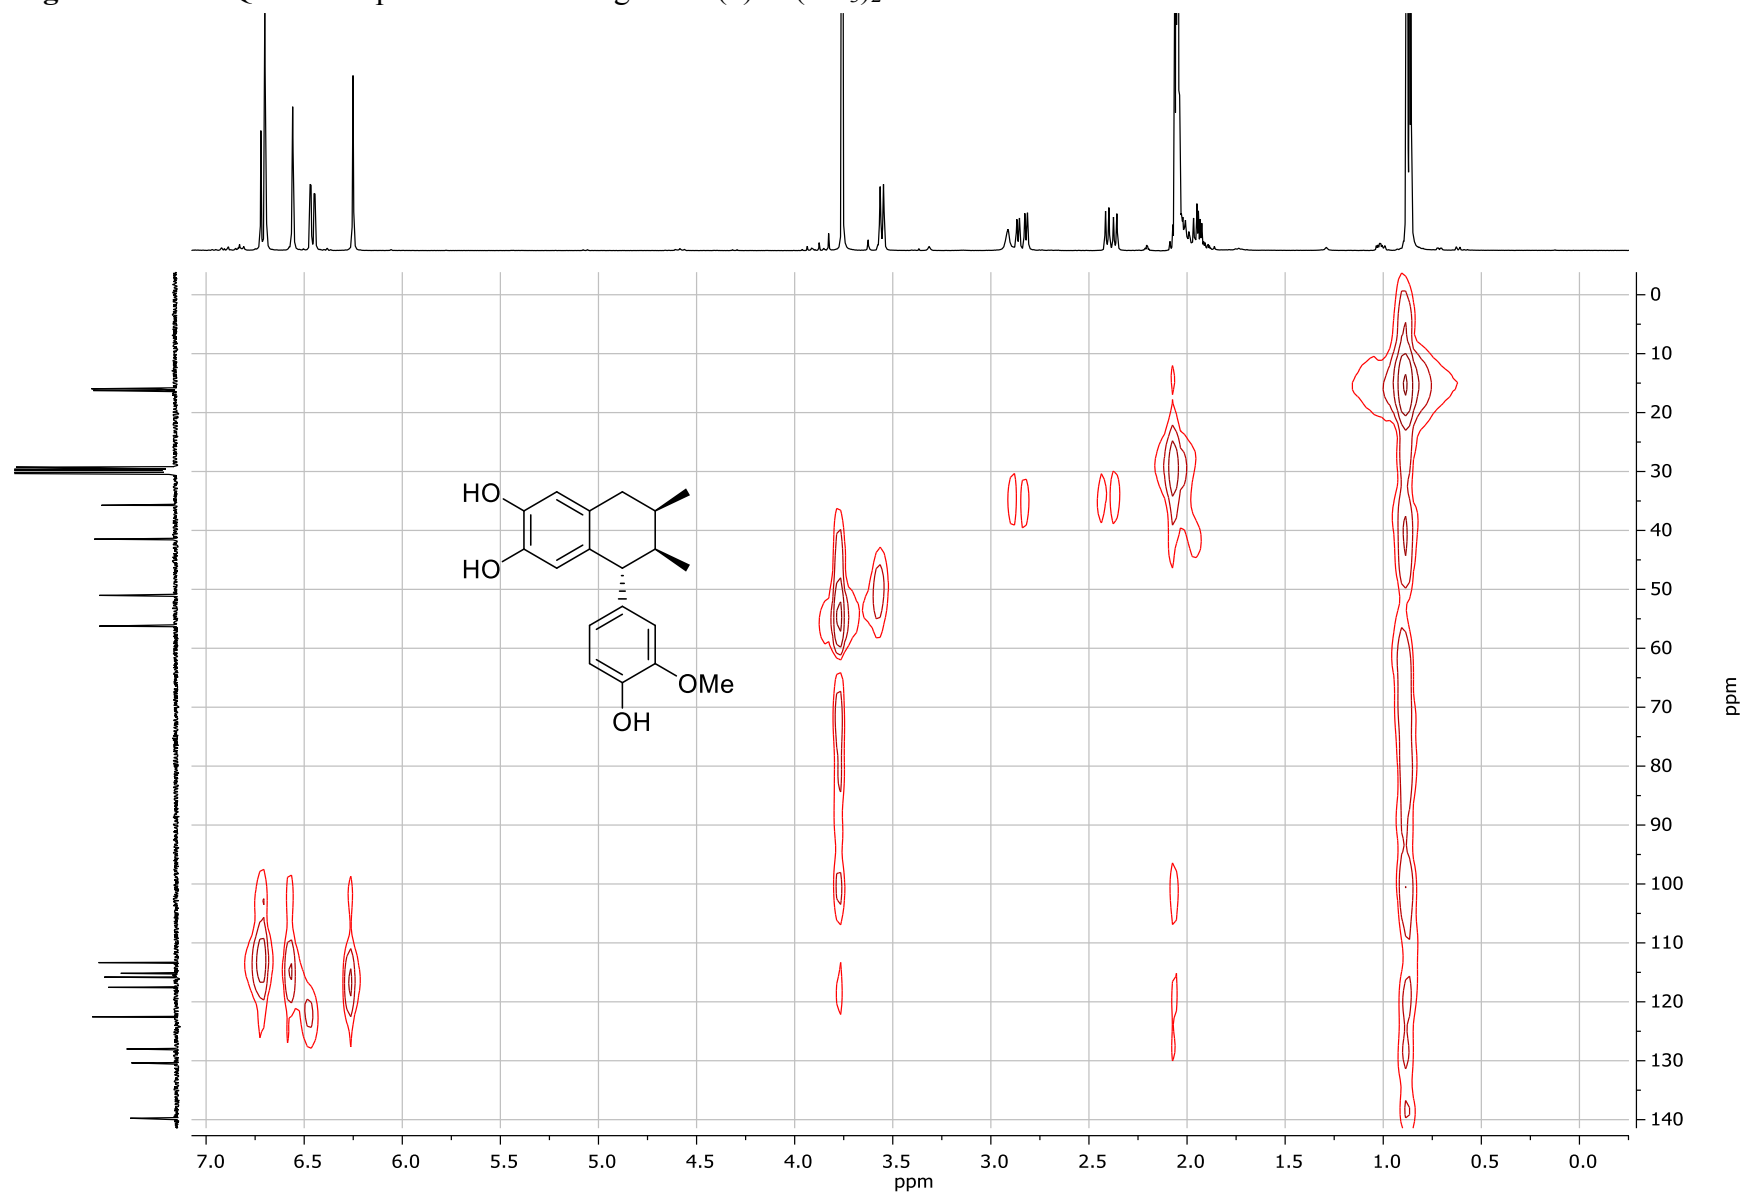

**Figure S19.**  $^1\text{H}$  NMR spectrum of 3'-demethoxyisoguaiacin (**5**) in  $(\text{CD}_3)_2\text{CO}$

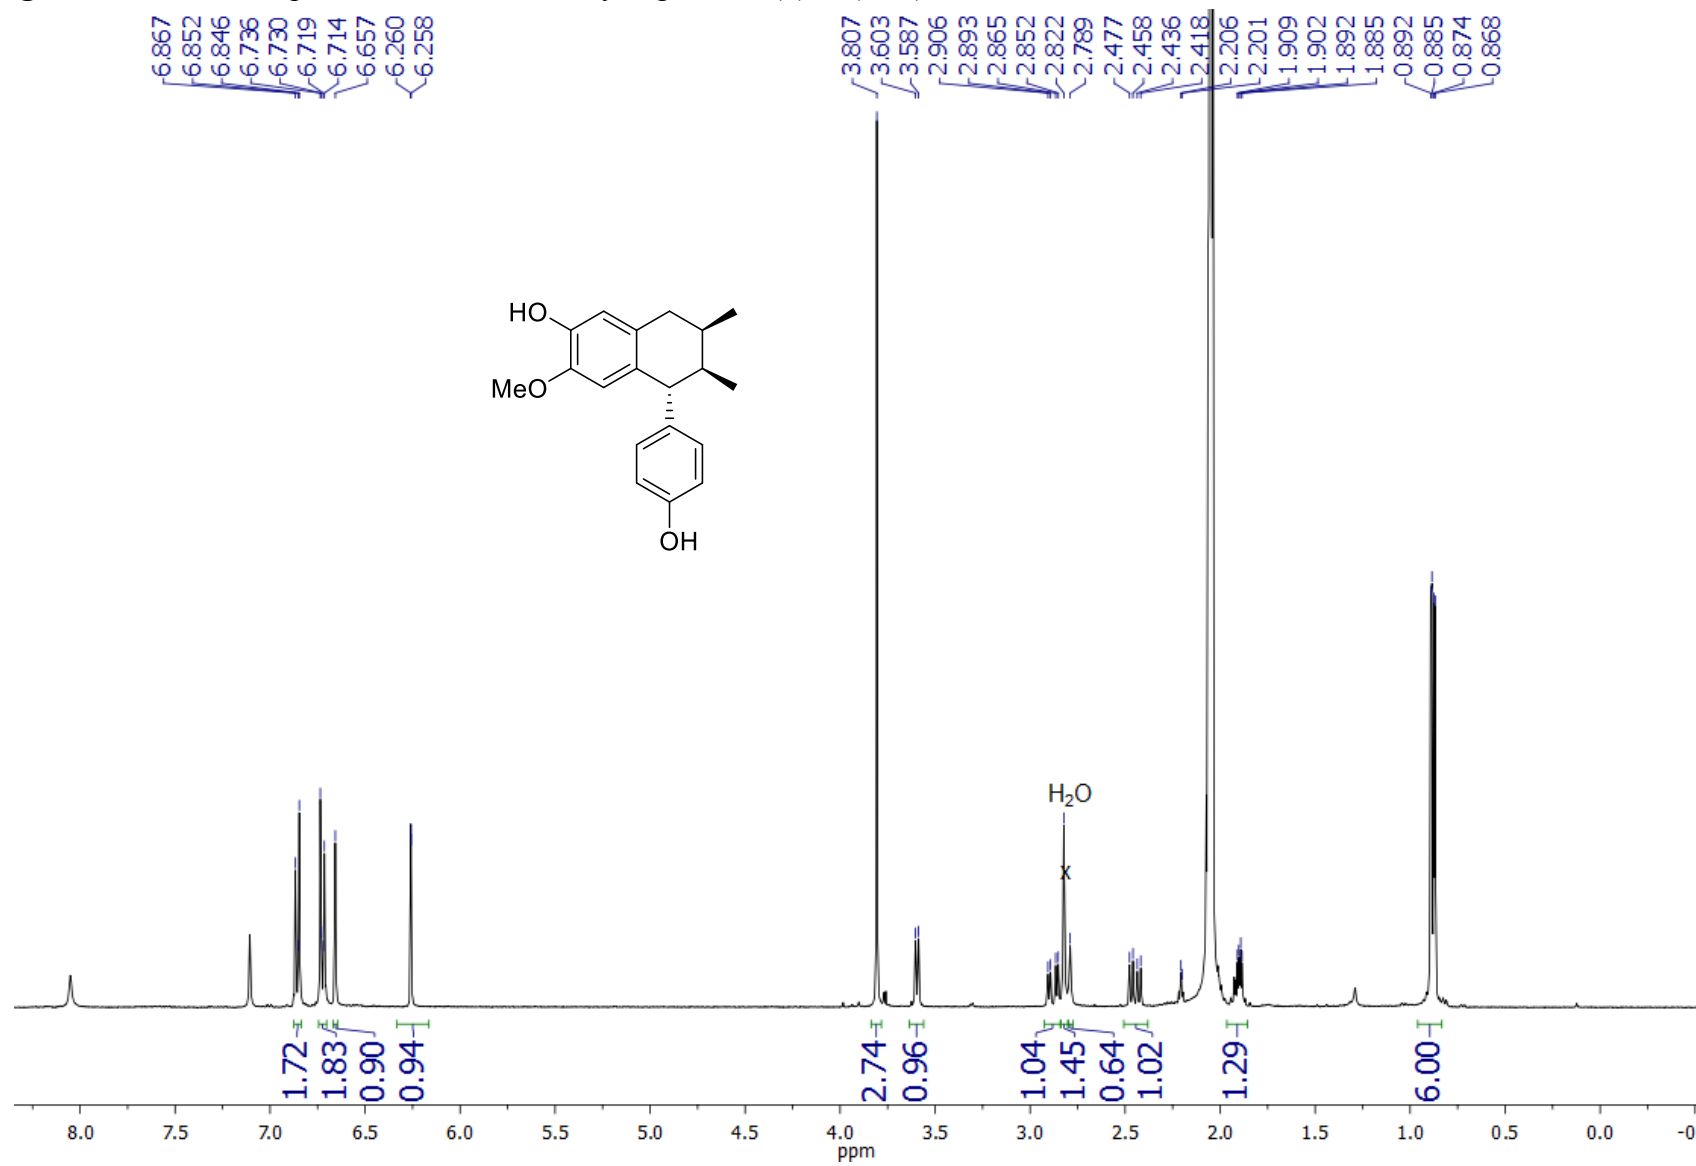

Figure S20.  $^{13}\text{C}$  NMR spectrum of 3'-demethoxyisoguaiacin (**5**) in  $(\text{CD}_3)_2\text{CO}$

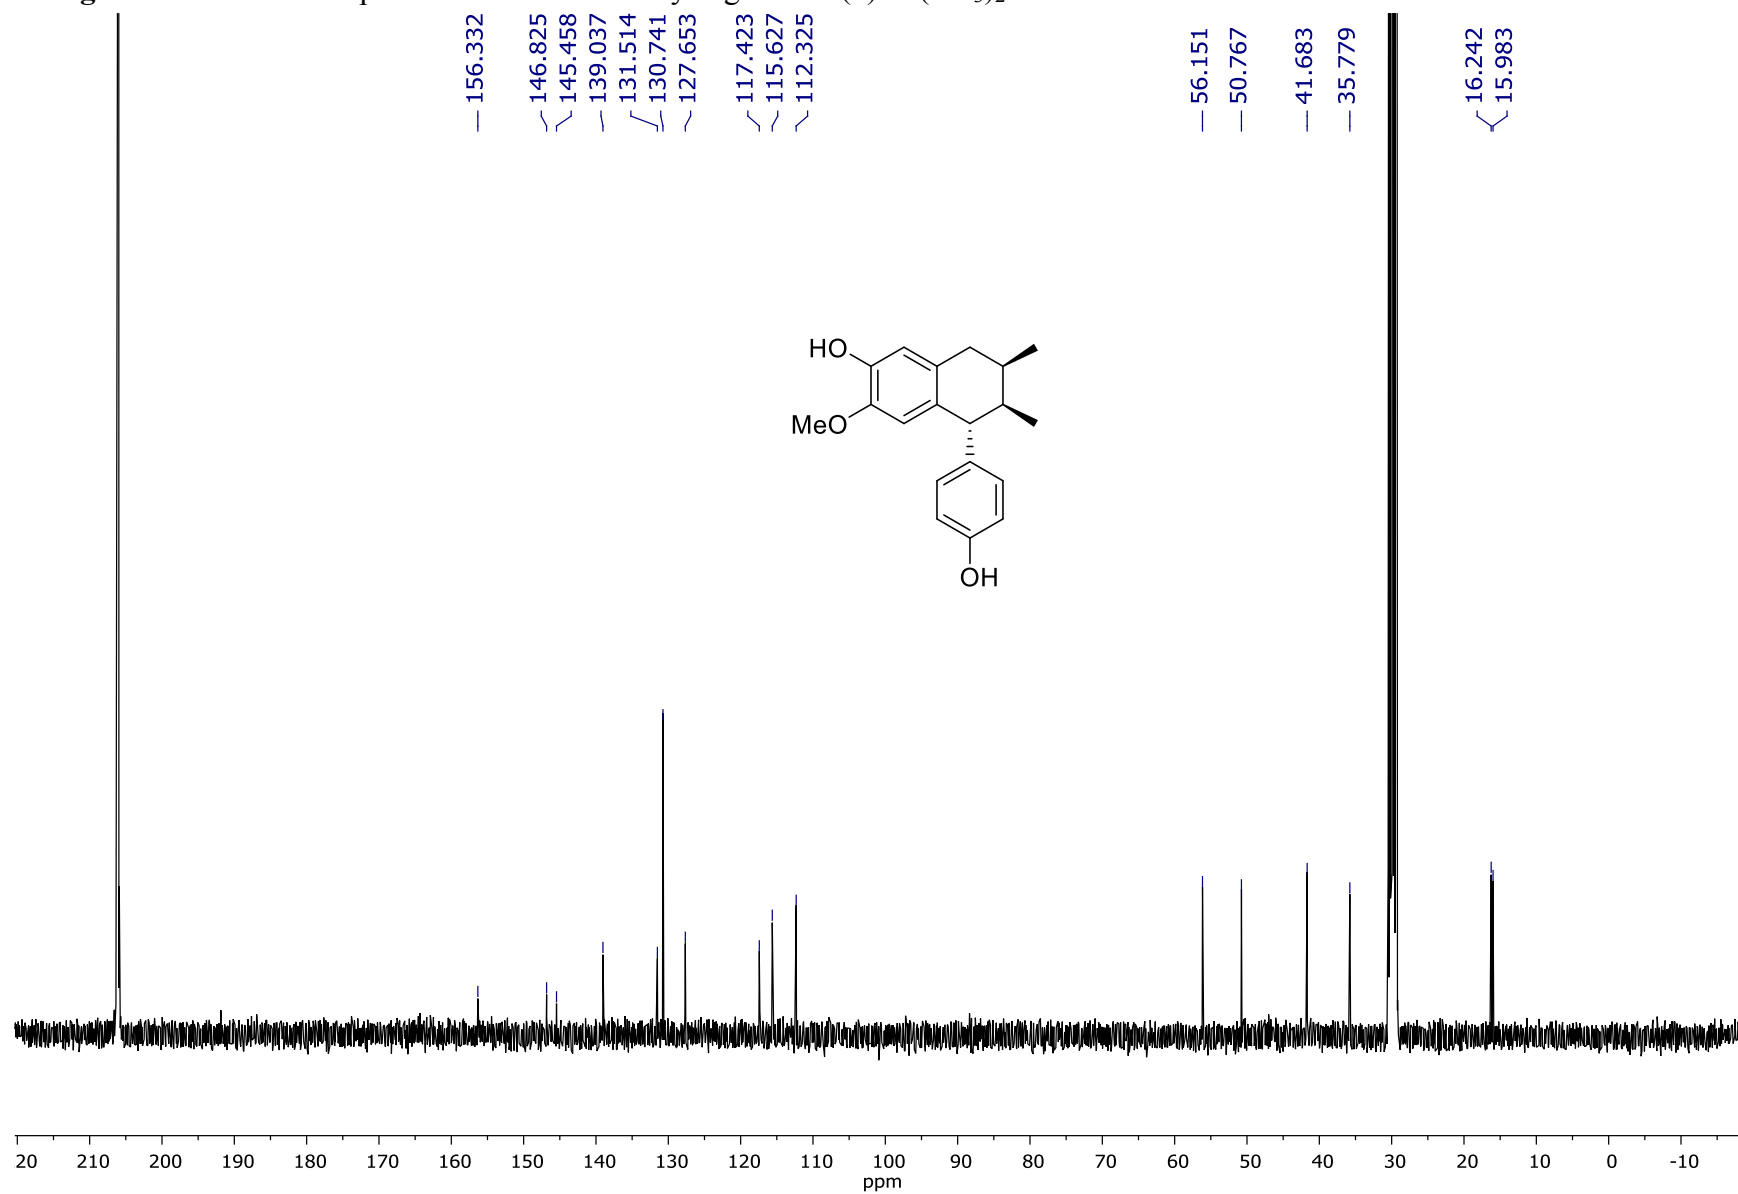

Figure S21.  $^{13}\text{C}$  DEPT-135 NMR spectrum of 3'-demethoxyisoguaiacin (**5**) in  $(\text{CD}_3)_2\text{CO}$

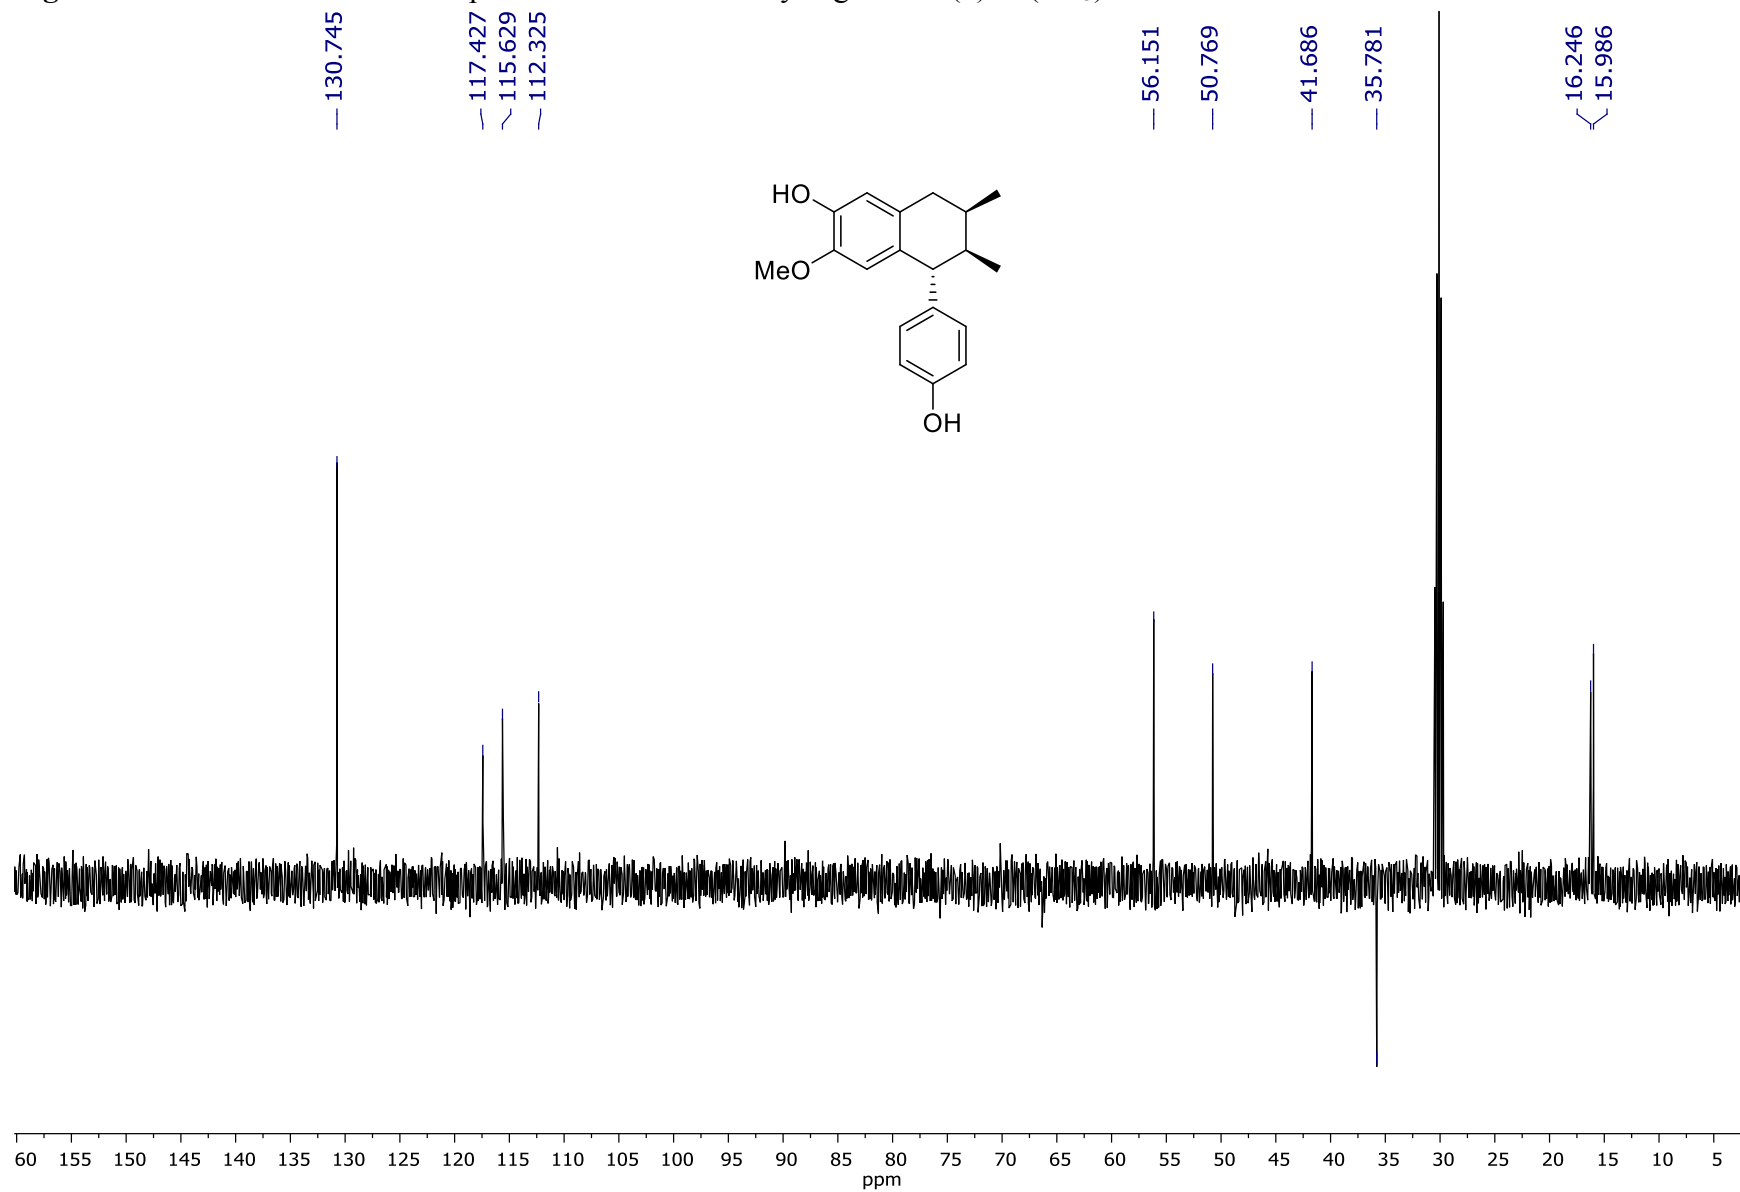

Figure S22. HMQC NMR spectrum of 3'-demethoxyisoguaiacin (**5**) in  $(\text{CD}_3)_2\text{CO}$

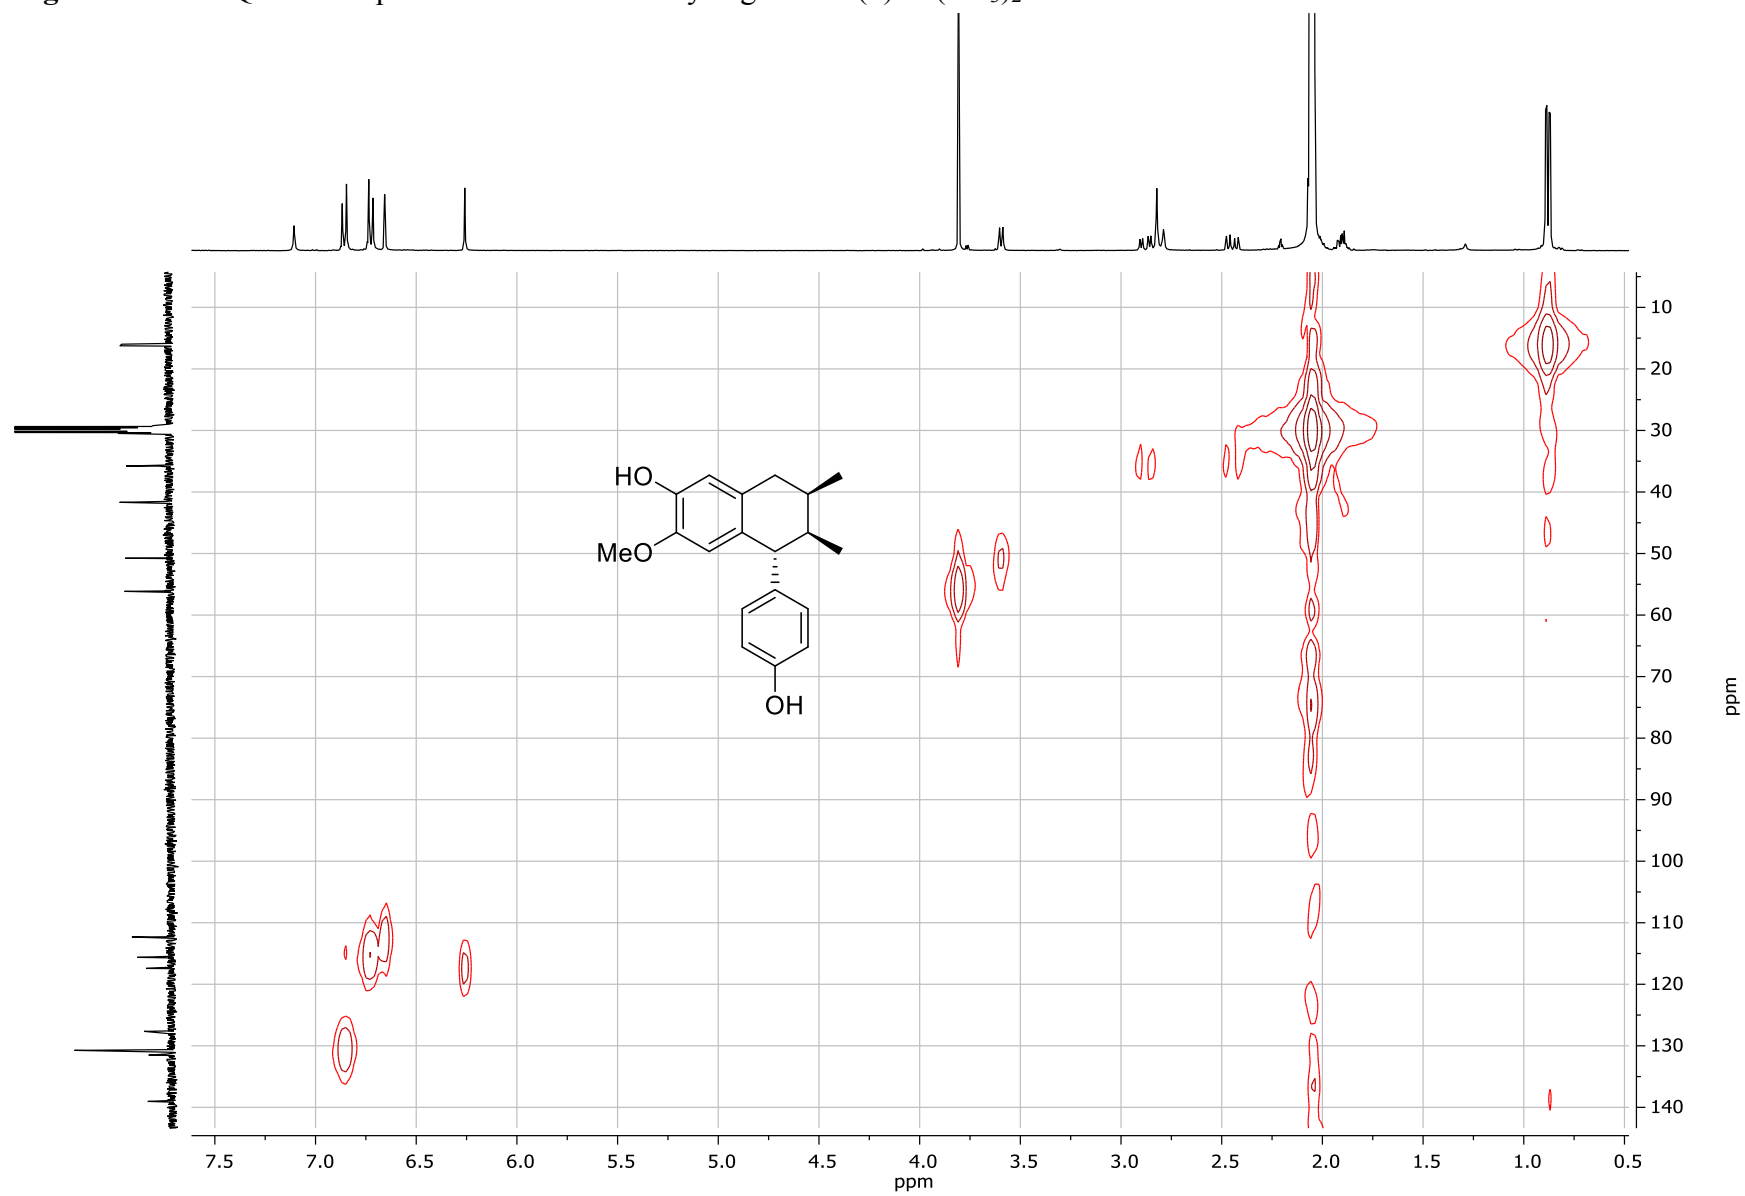

Figure S23.  $^1\text{H}$  NMR spectrum of 6, 3'-di-*O*-demethoxy-isoguaiacin (**6**) in  $\text{CD}_3\text{OD}$

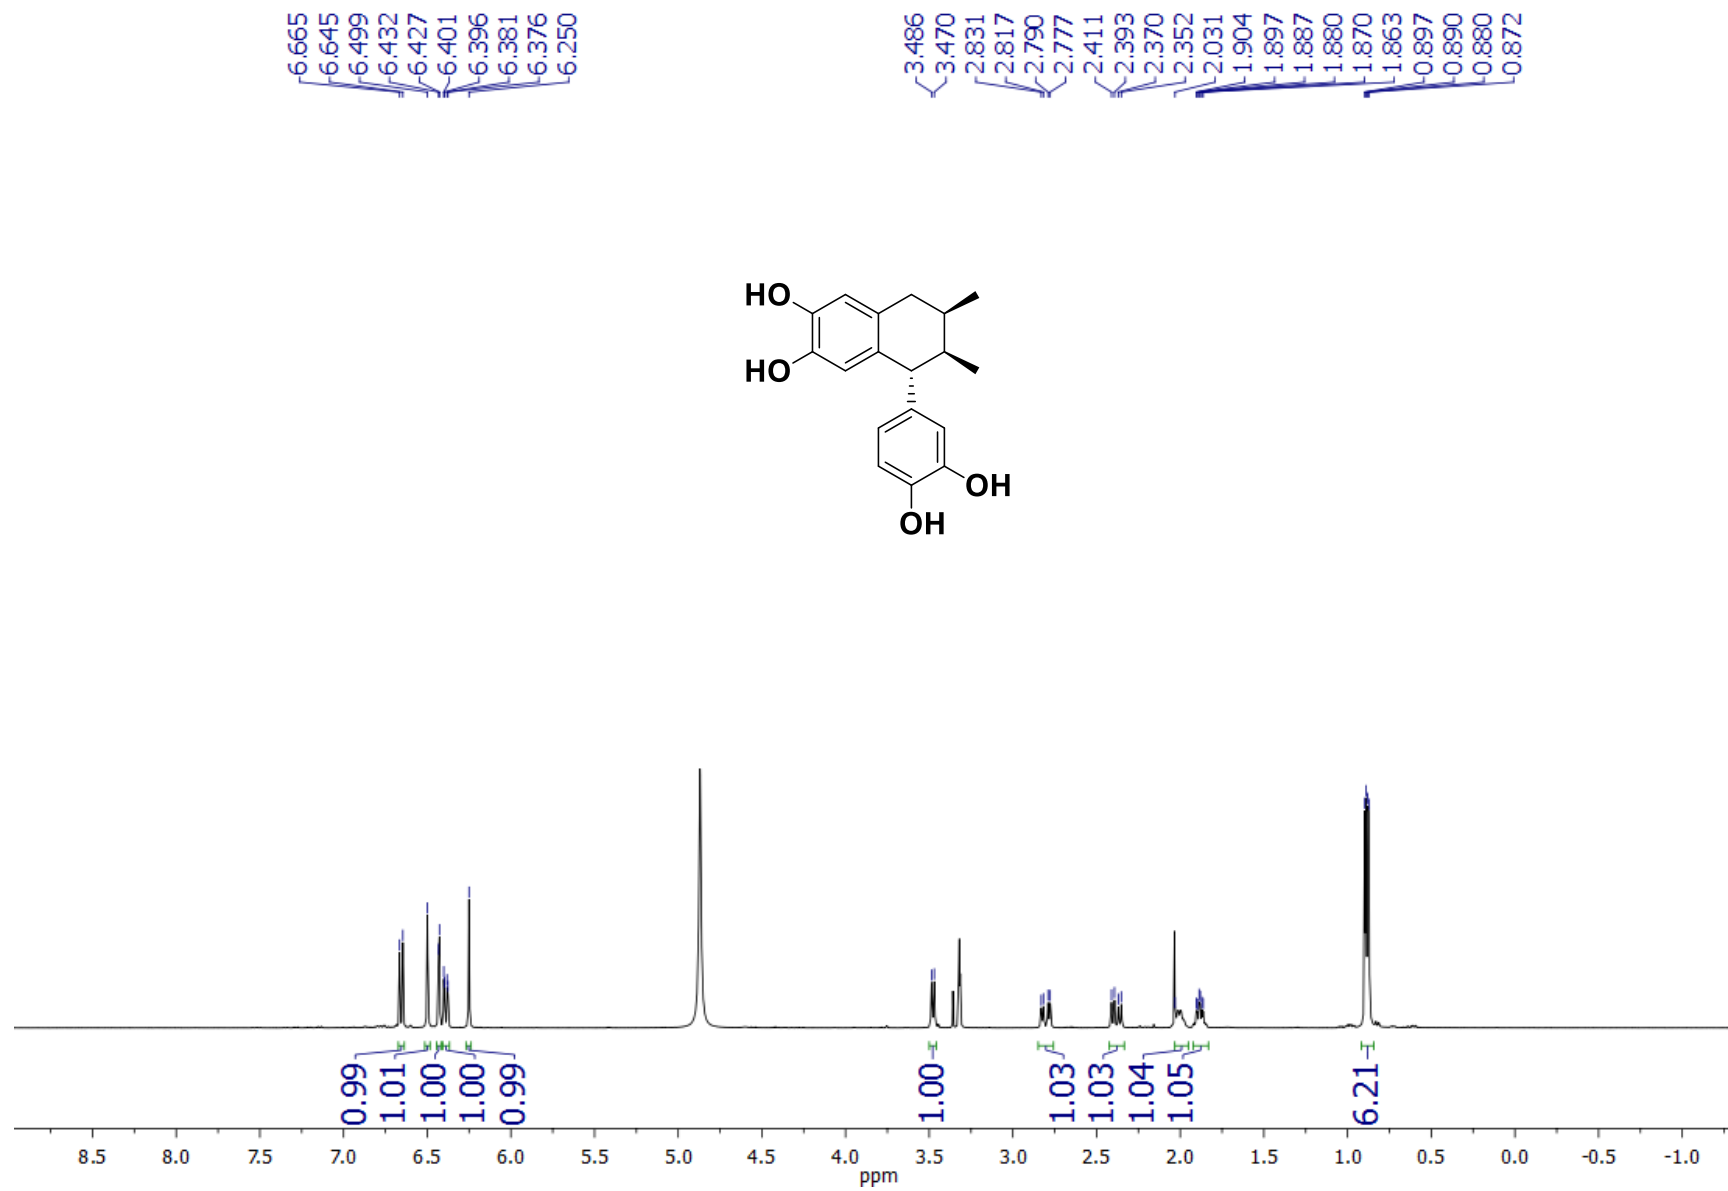



Figure S24.  $^{13}\text{C}$  NMR spectrum of 6, 3'-di-*O*-demethoxy-isoguaiacin (**6**) in  $\text{CD}_3\text{OD}$

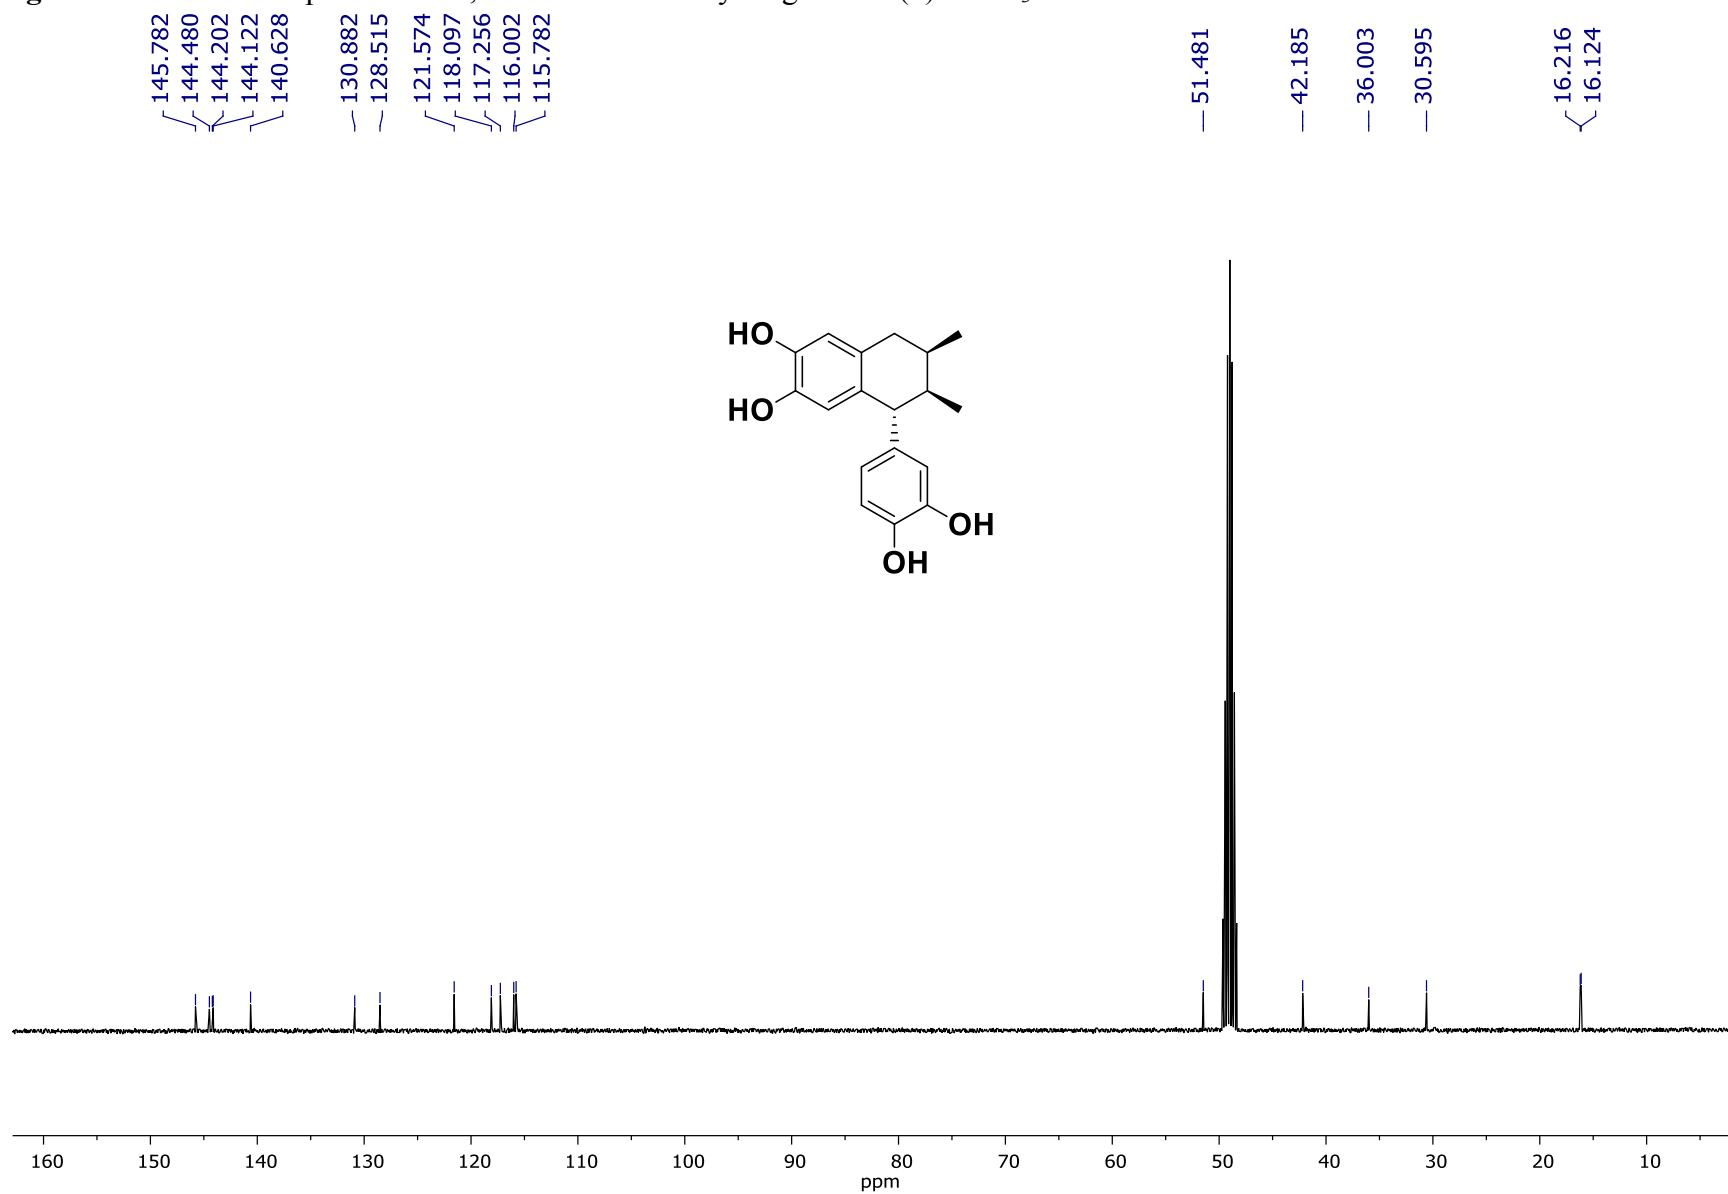

Figure S25.  $^{13}\text{C}$  DEPT-135 NMR spectrum of 6, 3'-di-*O*-demethoxy-isoguaiacin (**6**) in  $\text{CD}_3\text{OD}$

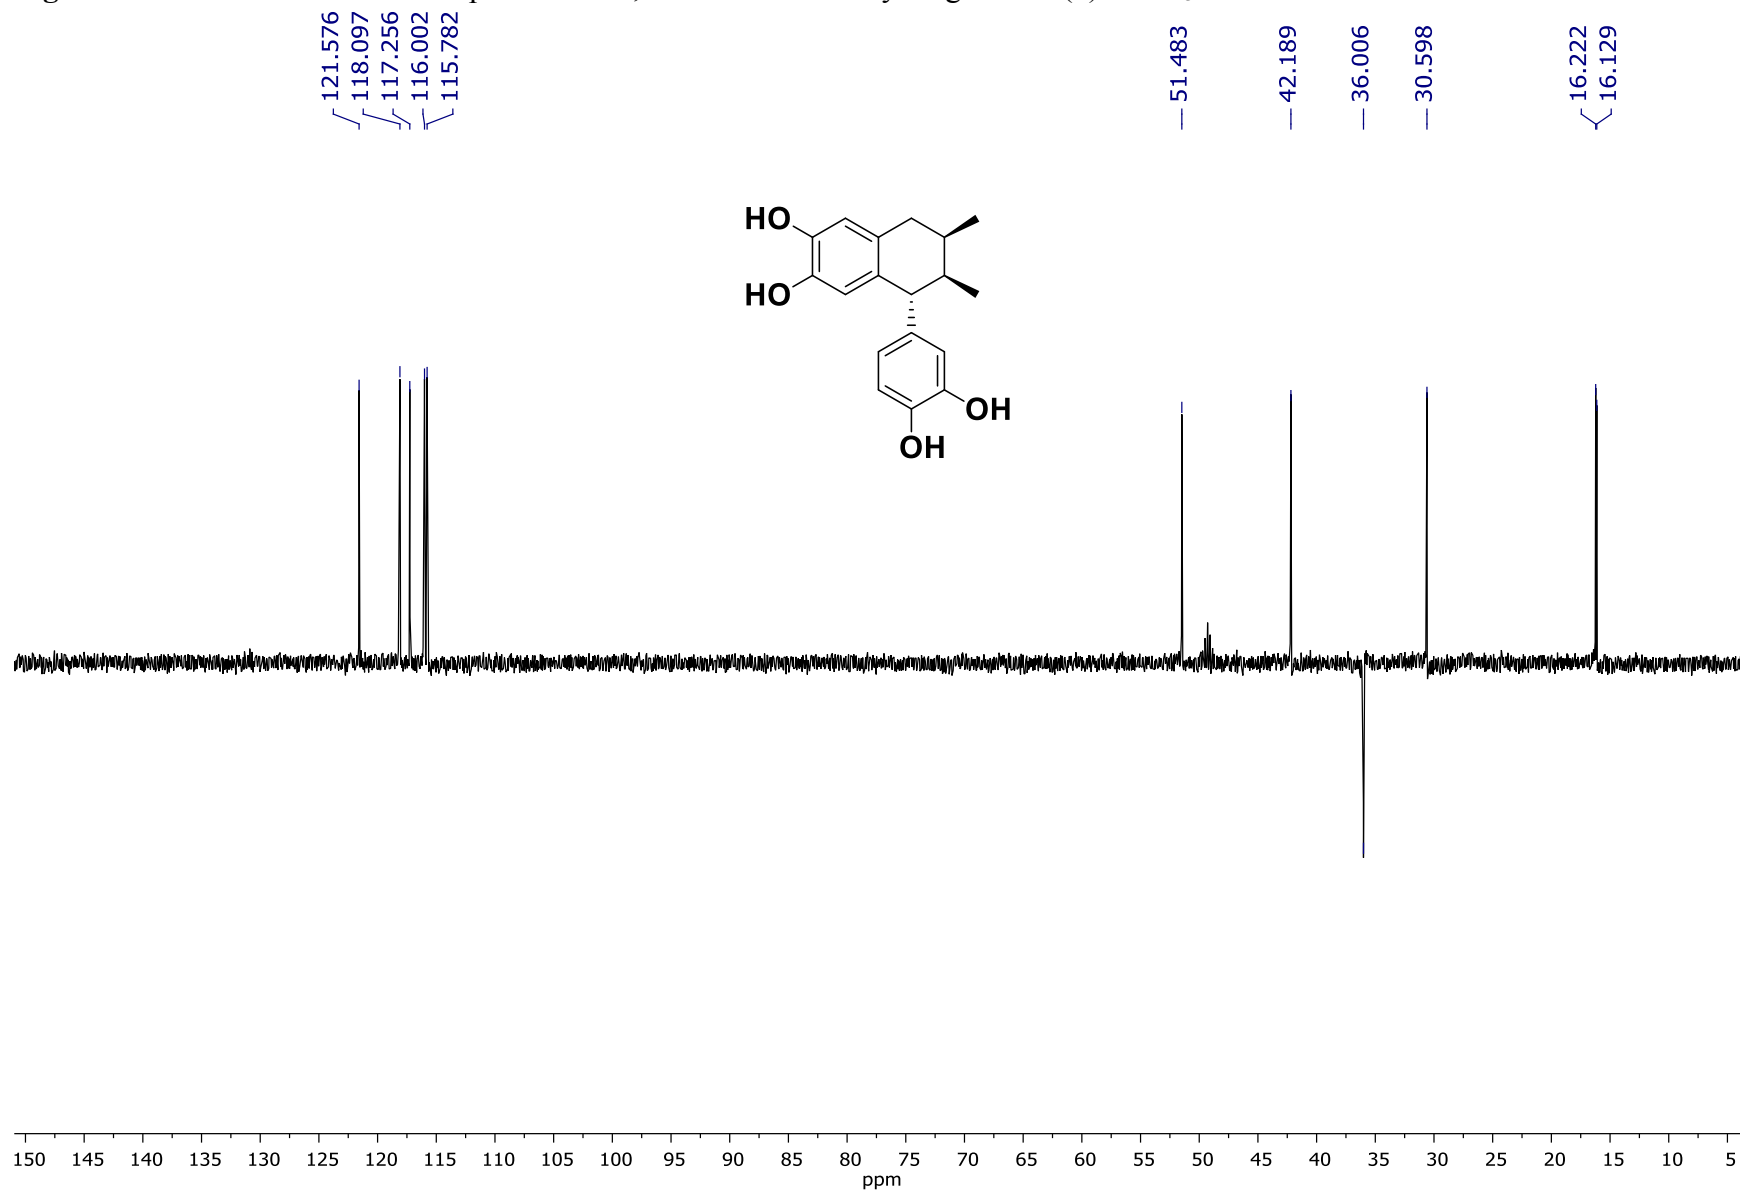

Figure S26. <sup>1</sup>H NMR spectrum of 3'-hydroxy-4-epi-larreatricin (**7**) in (CD<sub>3</sub>)<sub>2</sub>CO

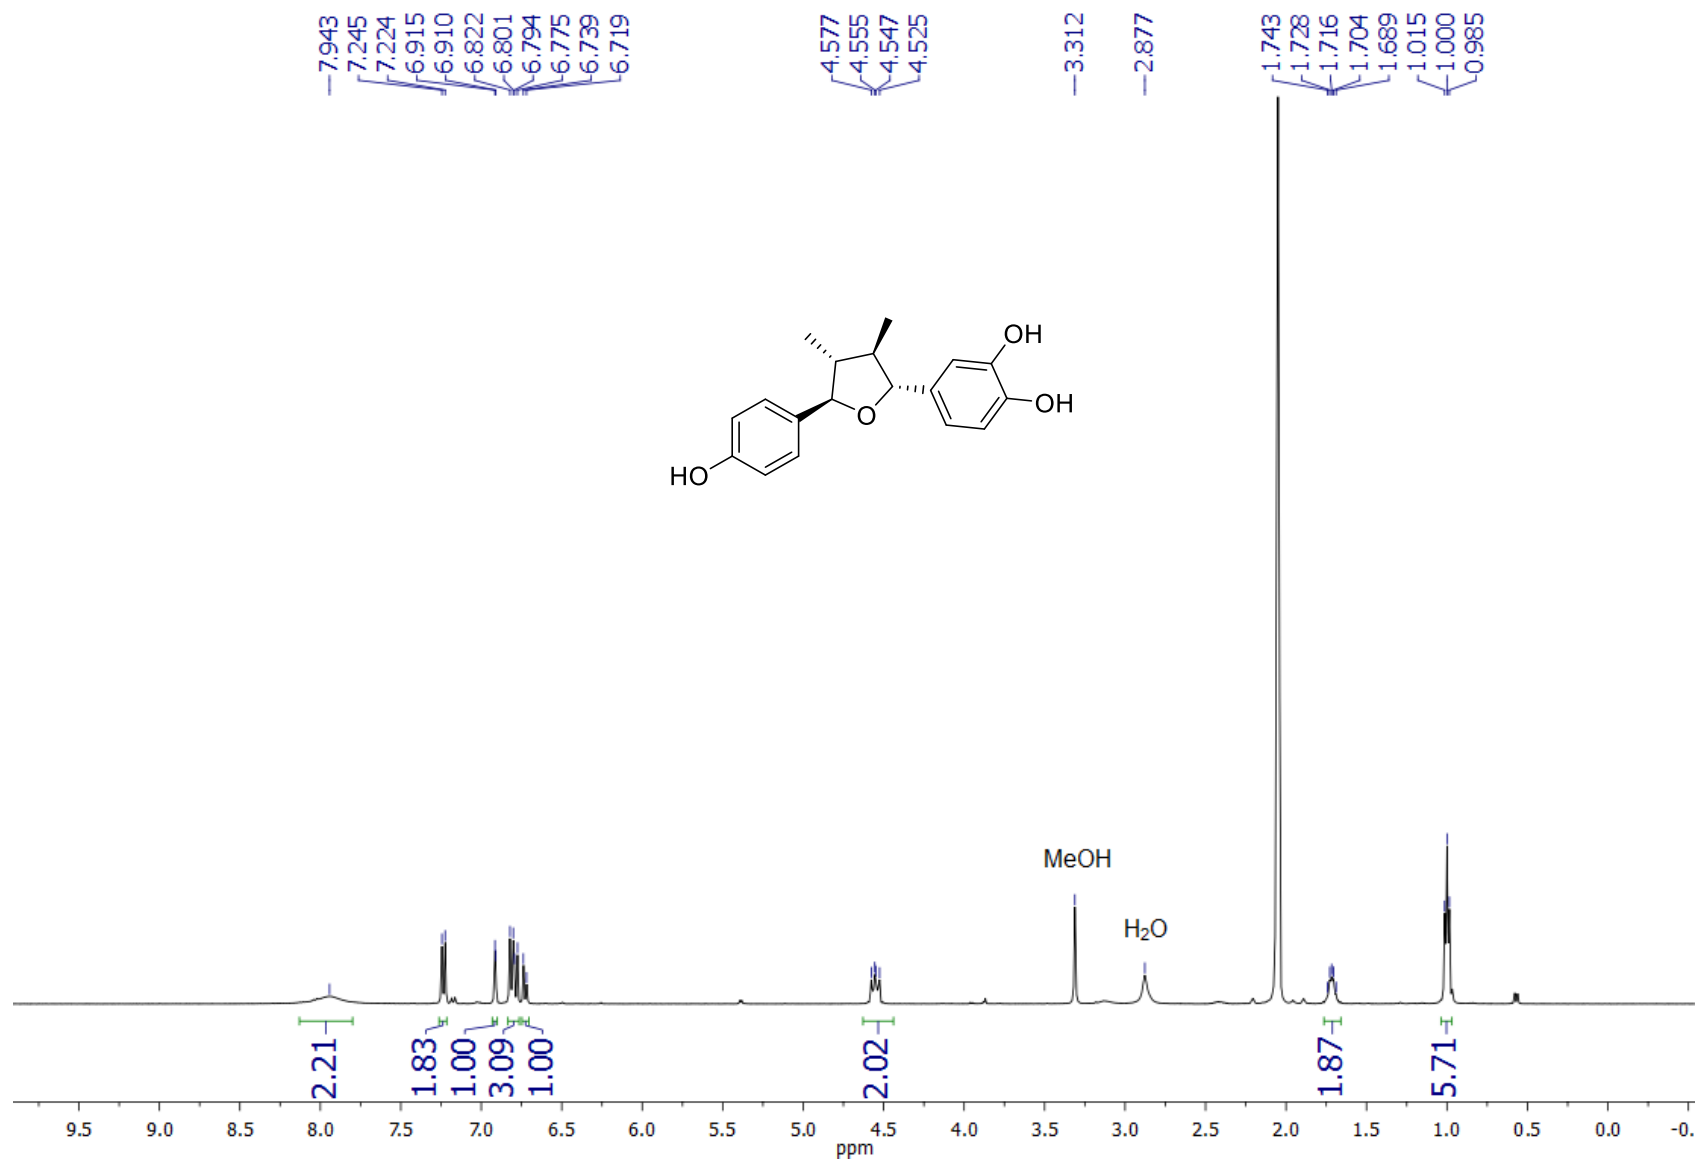

Figure S27.  $^{13}\text{C}$  NMR spectrum of 3'-hydroxy-4-epi-larreatricin (7) in  $(\text{CD}_3)_2\text{CO}$

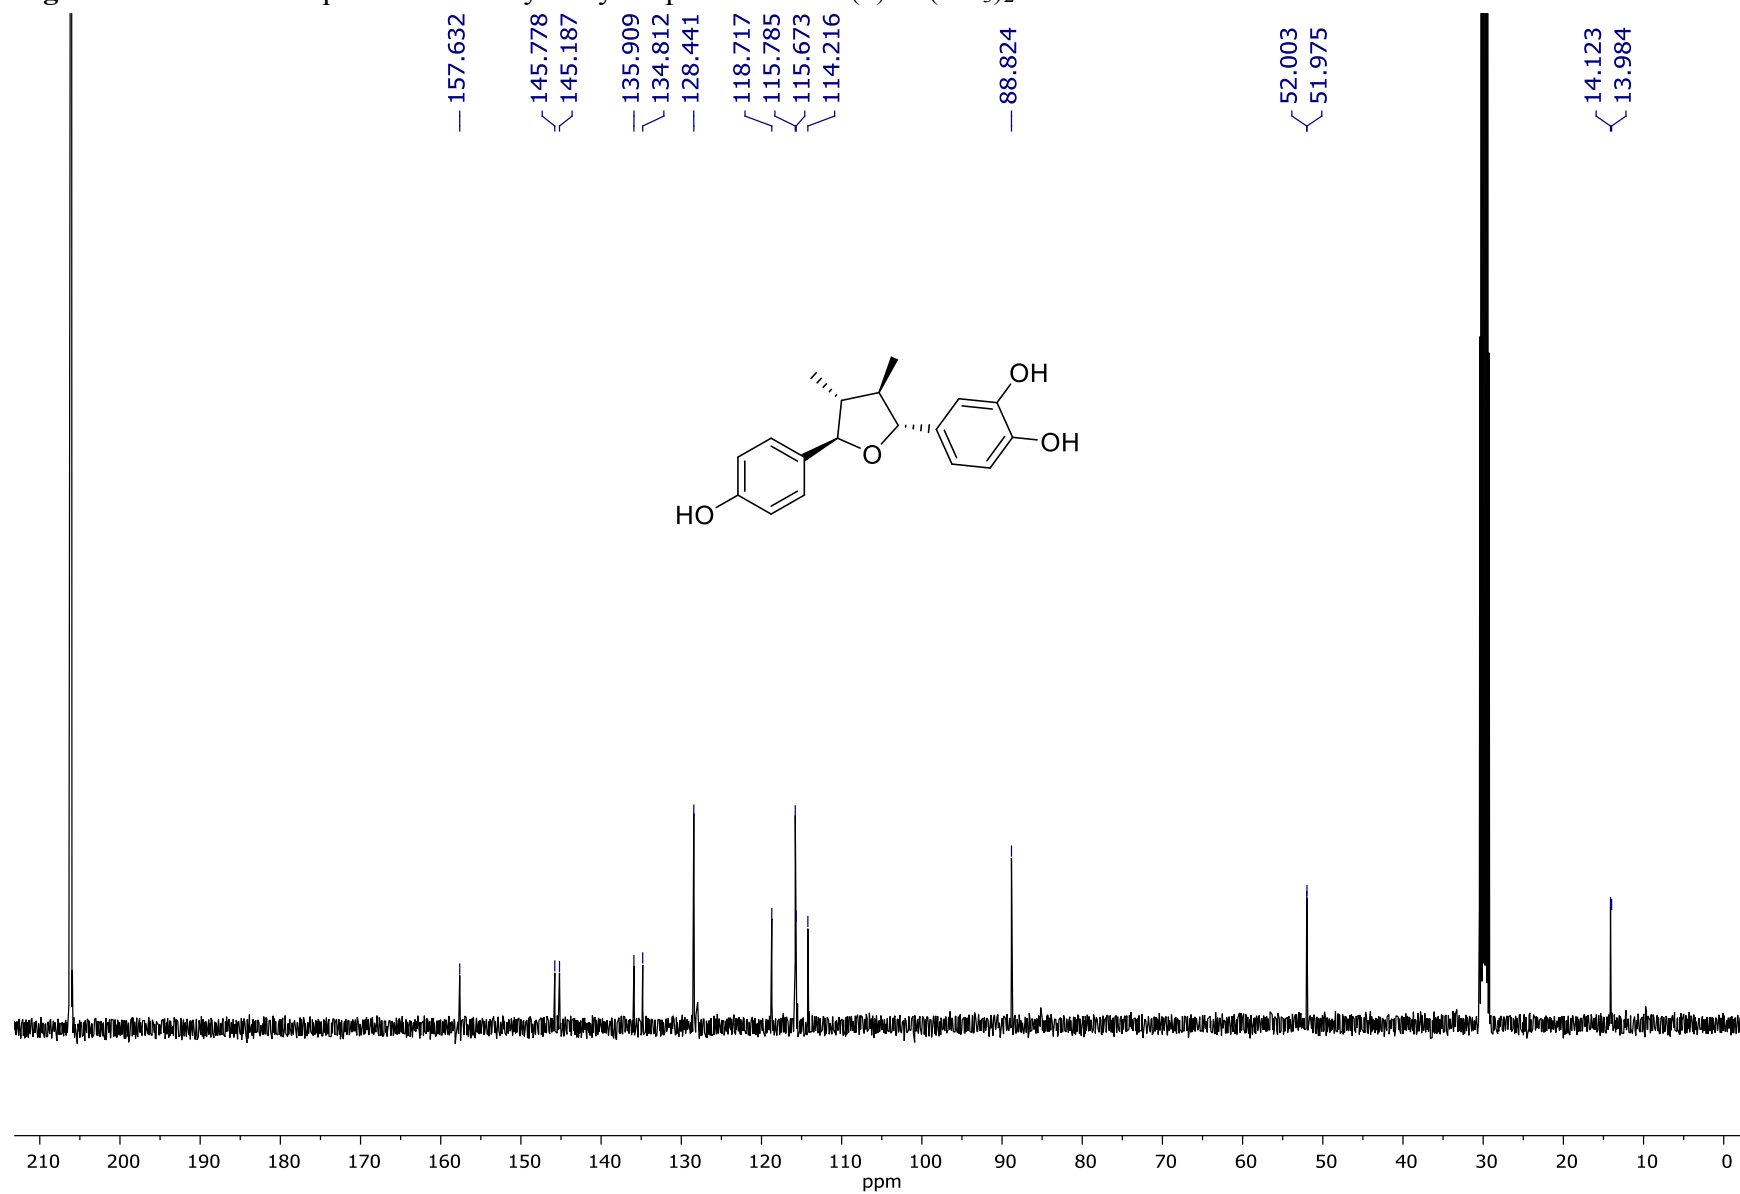

Figure S28.  $^{13}\text{C}$  DEPT-135 NMR spectrum of 3'-hydroxy-4-epi-larreatricin (**7**) in  $(\text{CD}_3)_2\text{CO}$

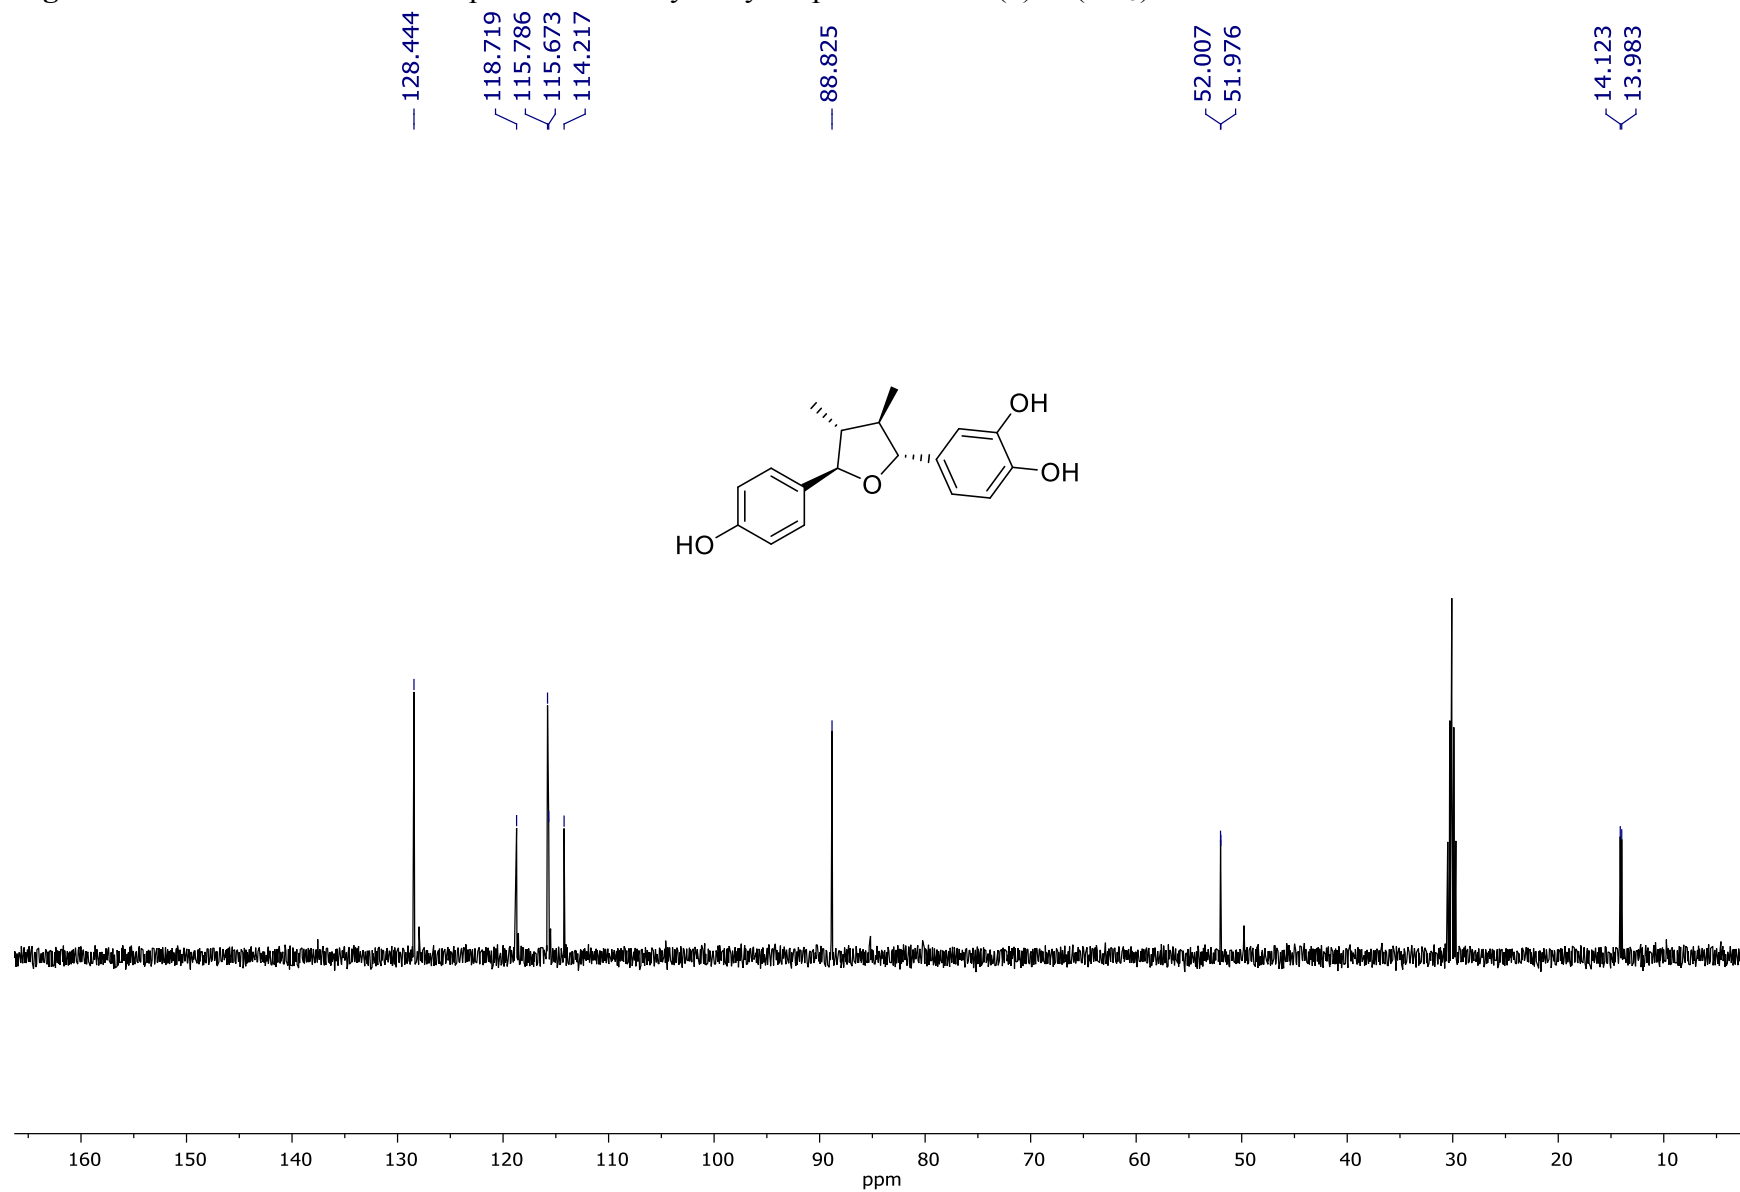

Figure S29.  $^{13}\text{C}$  DEPT-90 NMR spectrum of 3'-hydroxy-4-epi-larreatricin (**7**) in  $(\text{CD}_3)_2\text{CO}$

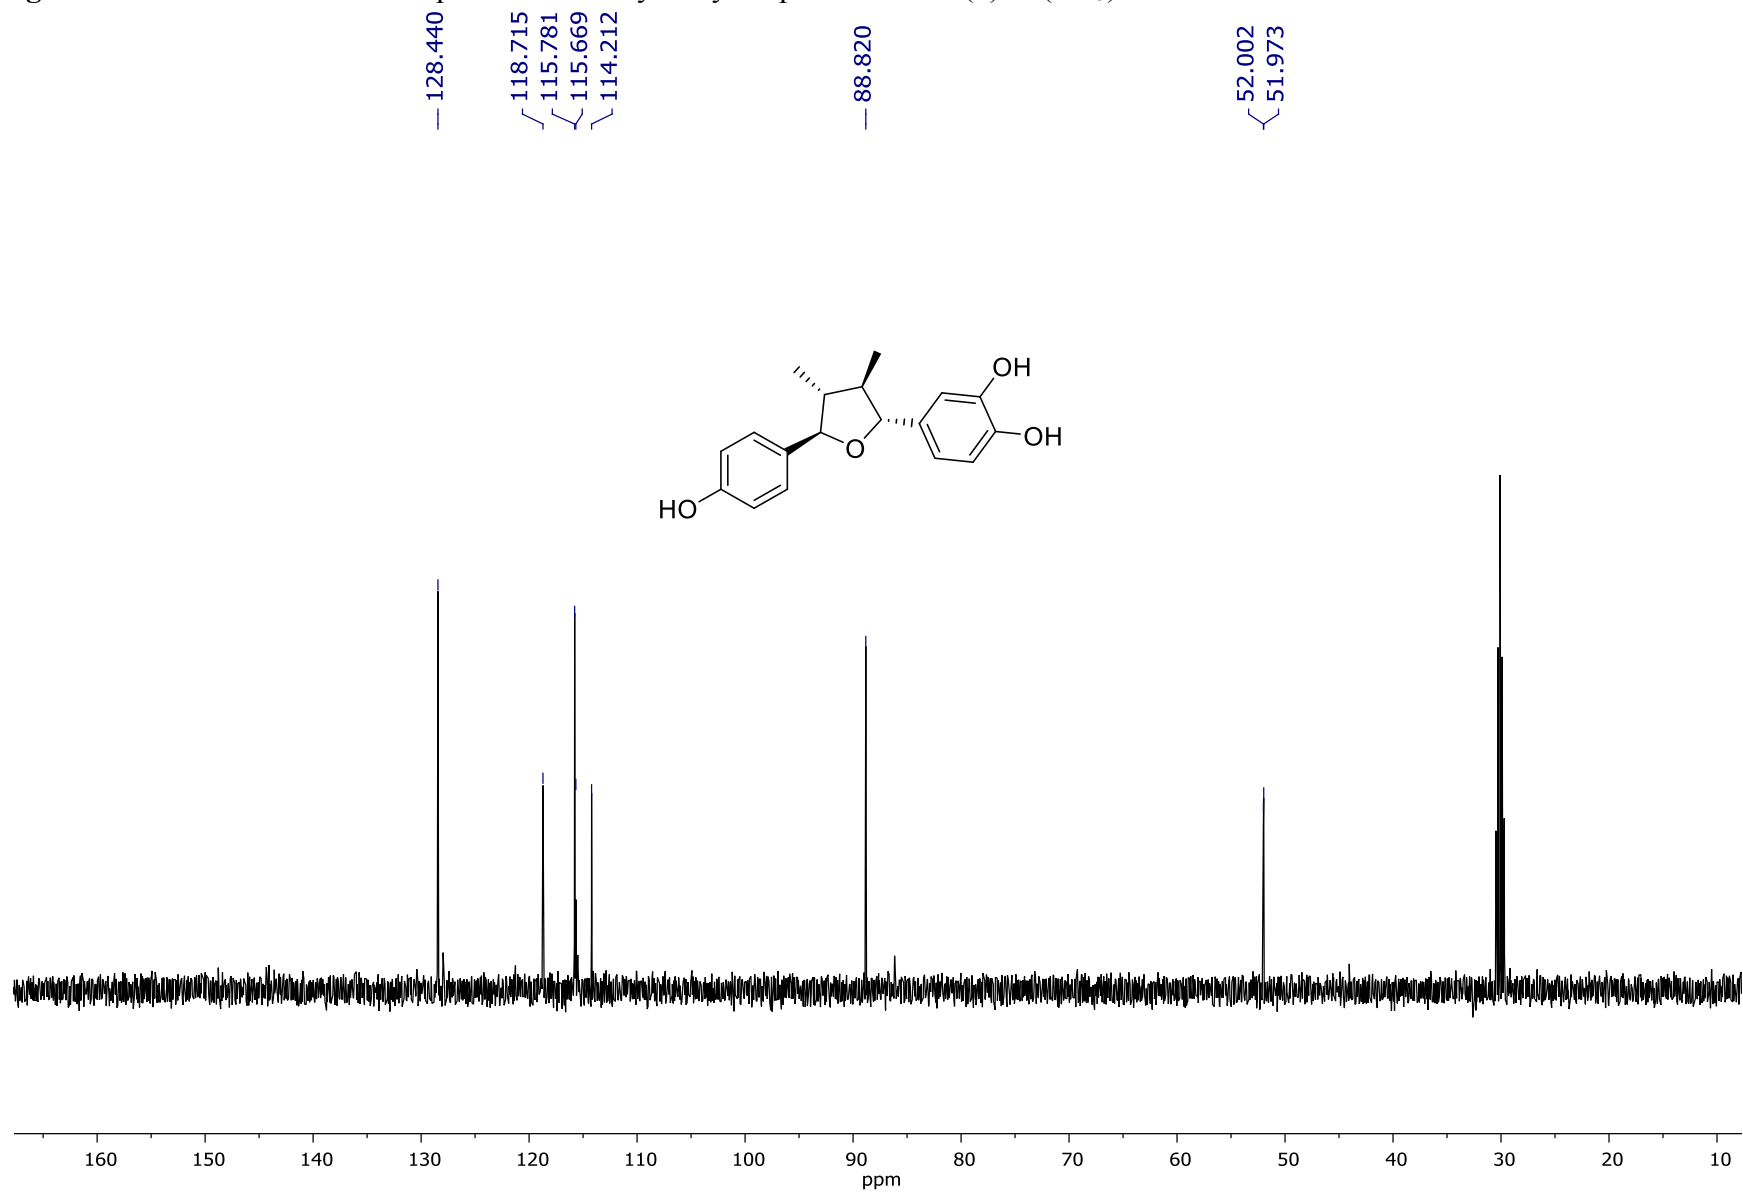

Figure S30. HMQC NMR spectrum of 3'-hydroxy-4-epi-larreatricin (**7**) in (CD<sub>3</sub>)<sub>2</sub>CO

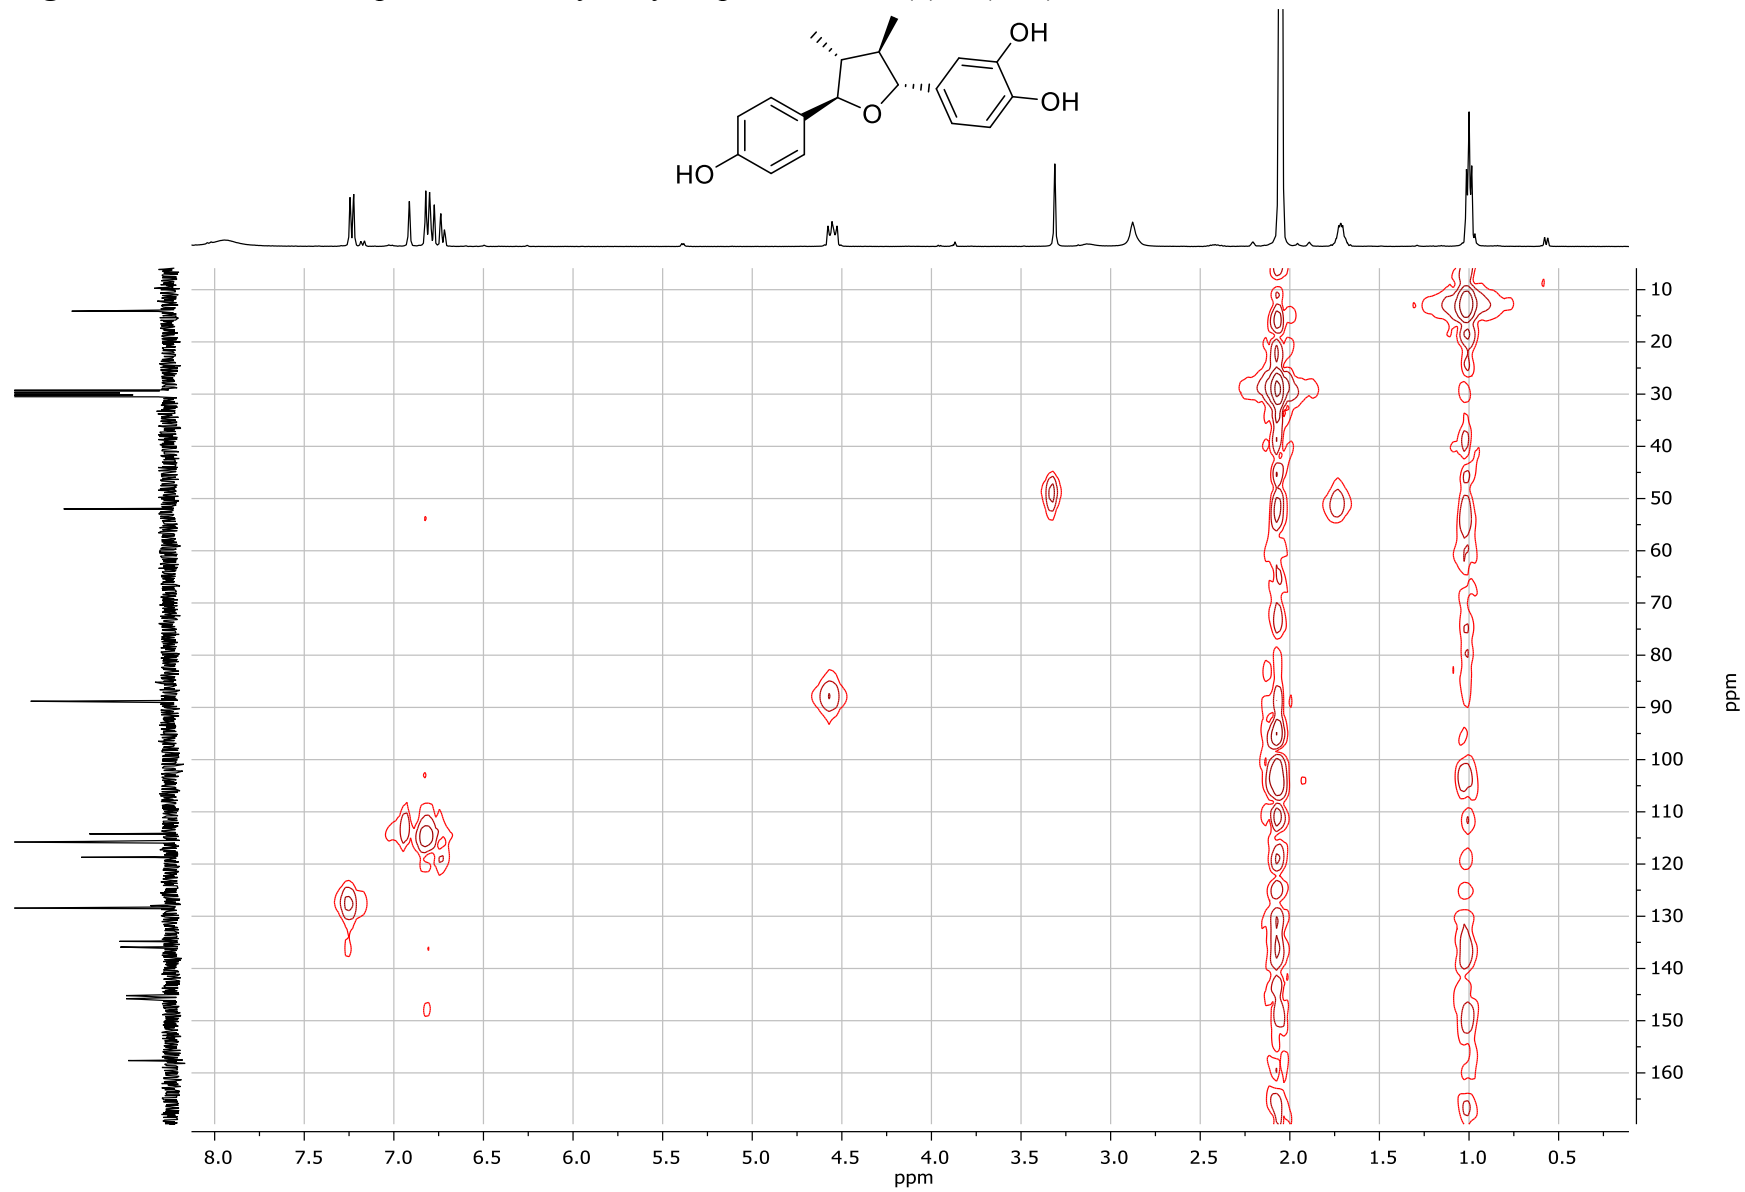

**Figure S31.**  $^1\text{H}$  NMR spectrum of (7R, 7'R)-7, 7'-bis(4', 3, 4-trihydroxyphenyl)-(8R, 8'S)-8, 8'-dimethyltetrahydrofuran (**8**) in  $(\text{CD}_3)_2\text{CO}$

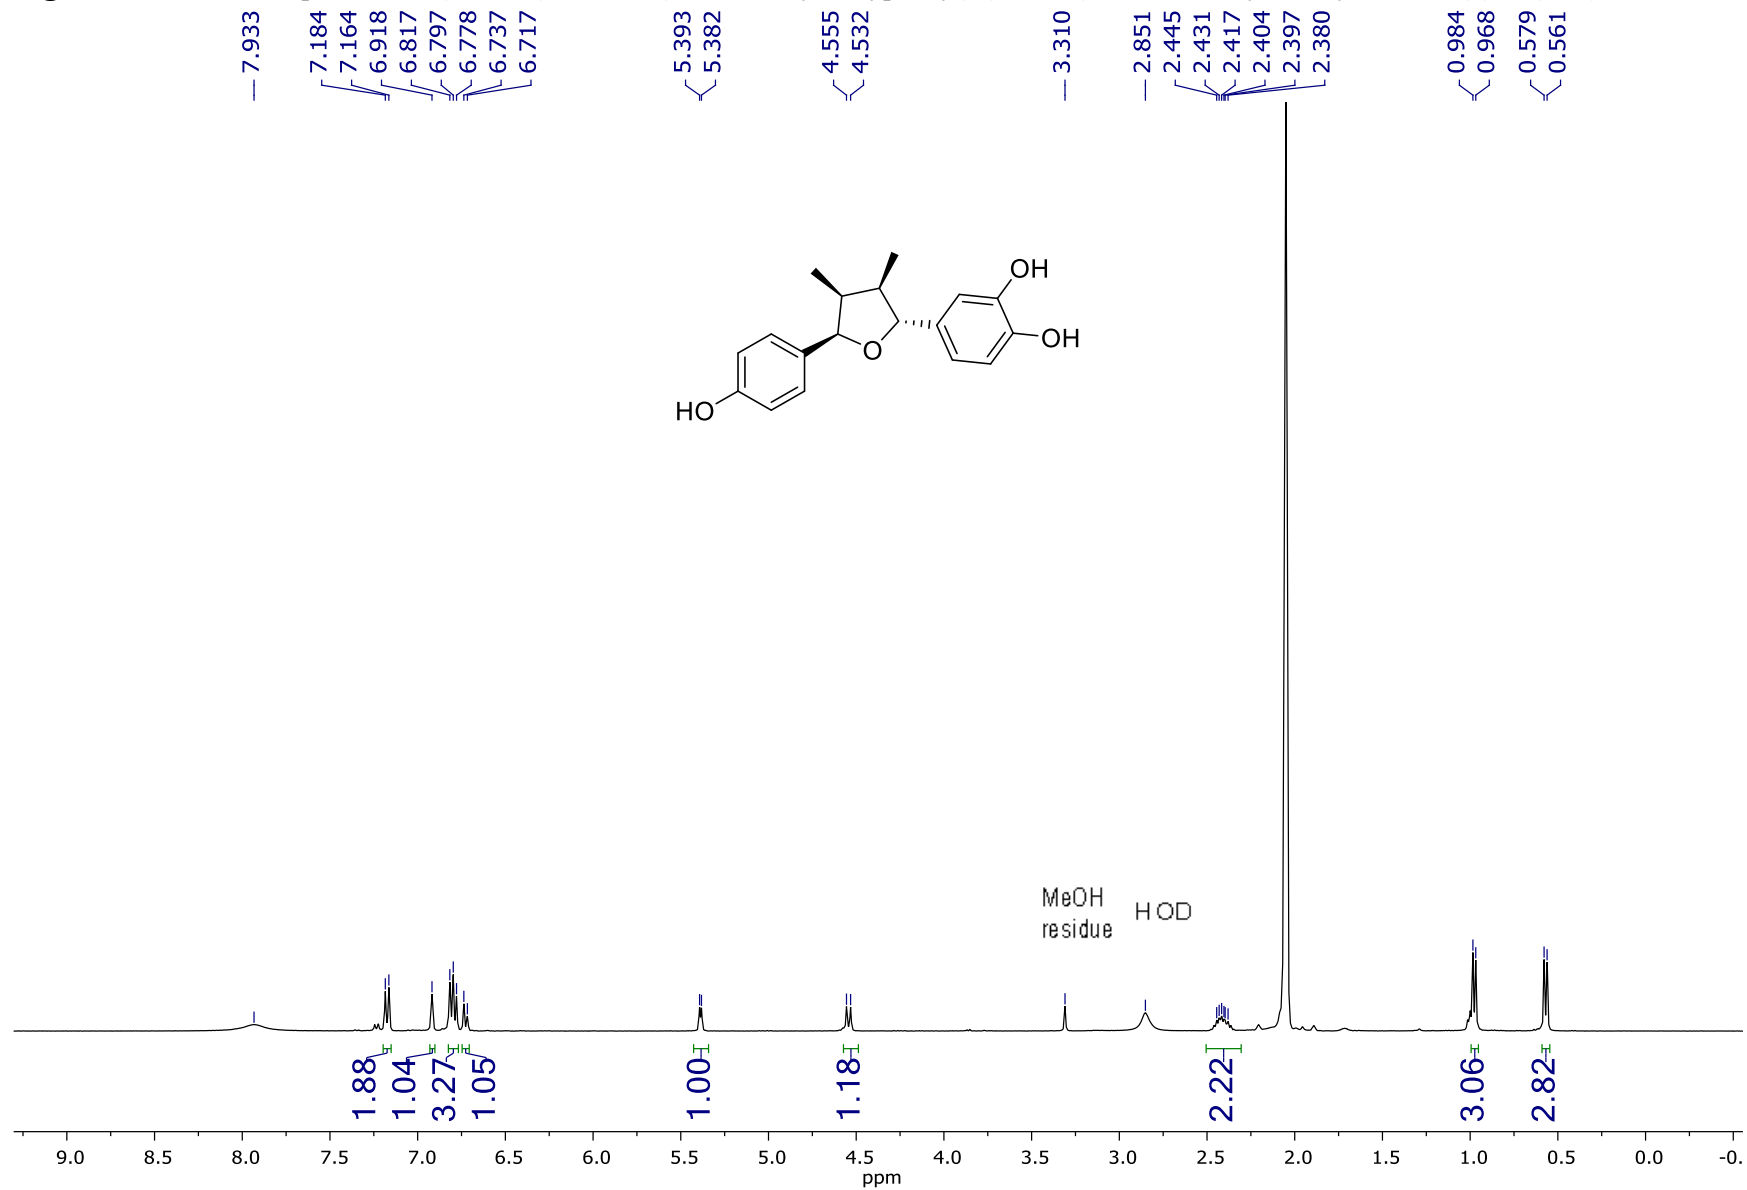



**Figure S32.**  $^{13}\text{C}$  NMR spectrum of (7R, 7'R)-7, 7'-bis(4', 3, 4-trihydroxyphenyl)-(8R, 8'S)-8, 8'-dimethyltetrahydrofuran (**8**) in  $(\text{CD}_3)_2\text{CO}$

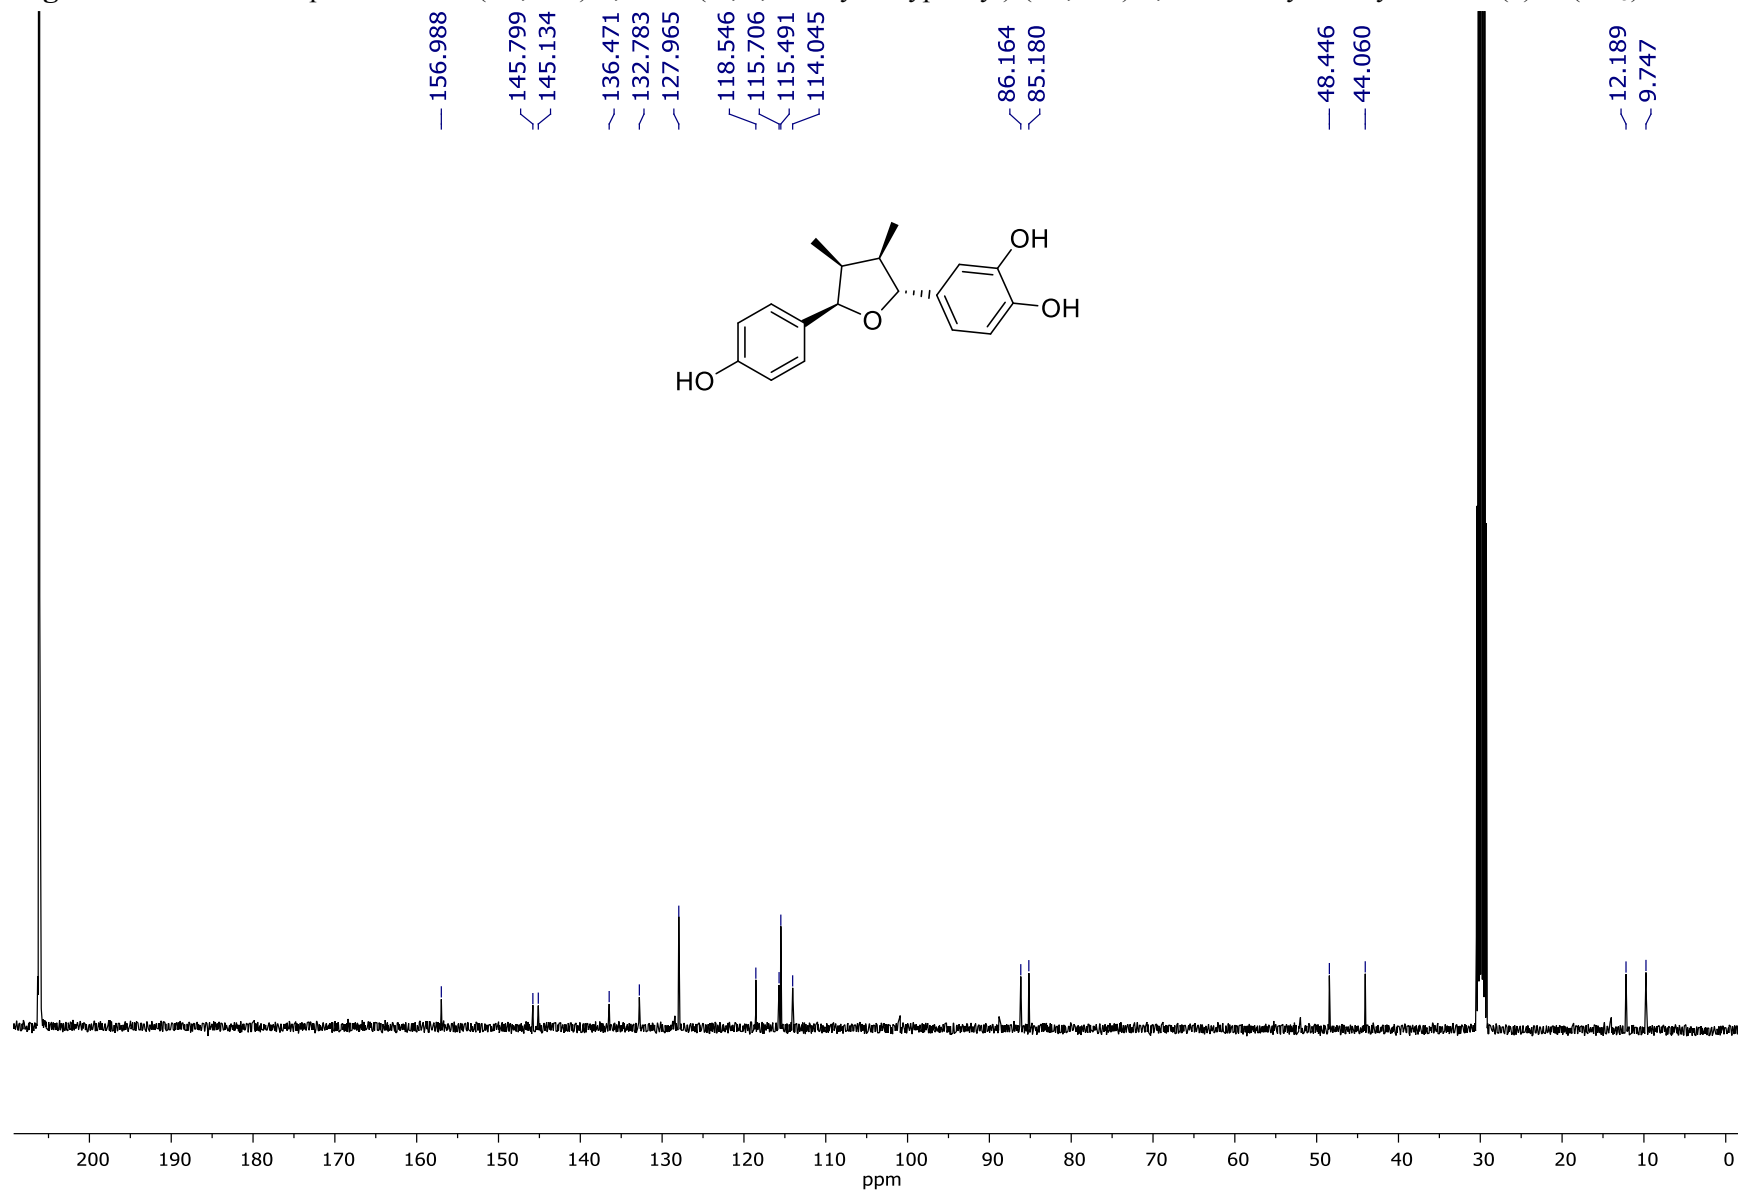

**Figure S33.**  $^{13}\text{C}$  DEPT-135 NMR spectrum of (7R, 7'R)-7, 7'-bis(4', 3, 4-trihydroxyphenyl)-(8R, 8'S)-8, 8'-dimethyltetrahydrofuran (**8**) in  $(\text{CD}_3)_2\text{CO}$

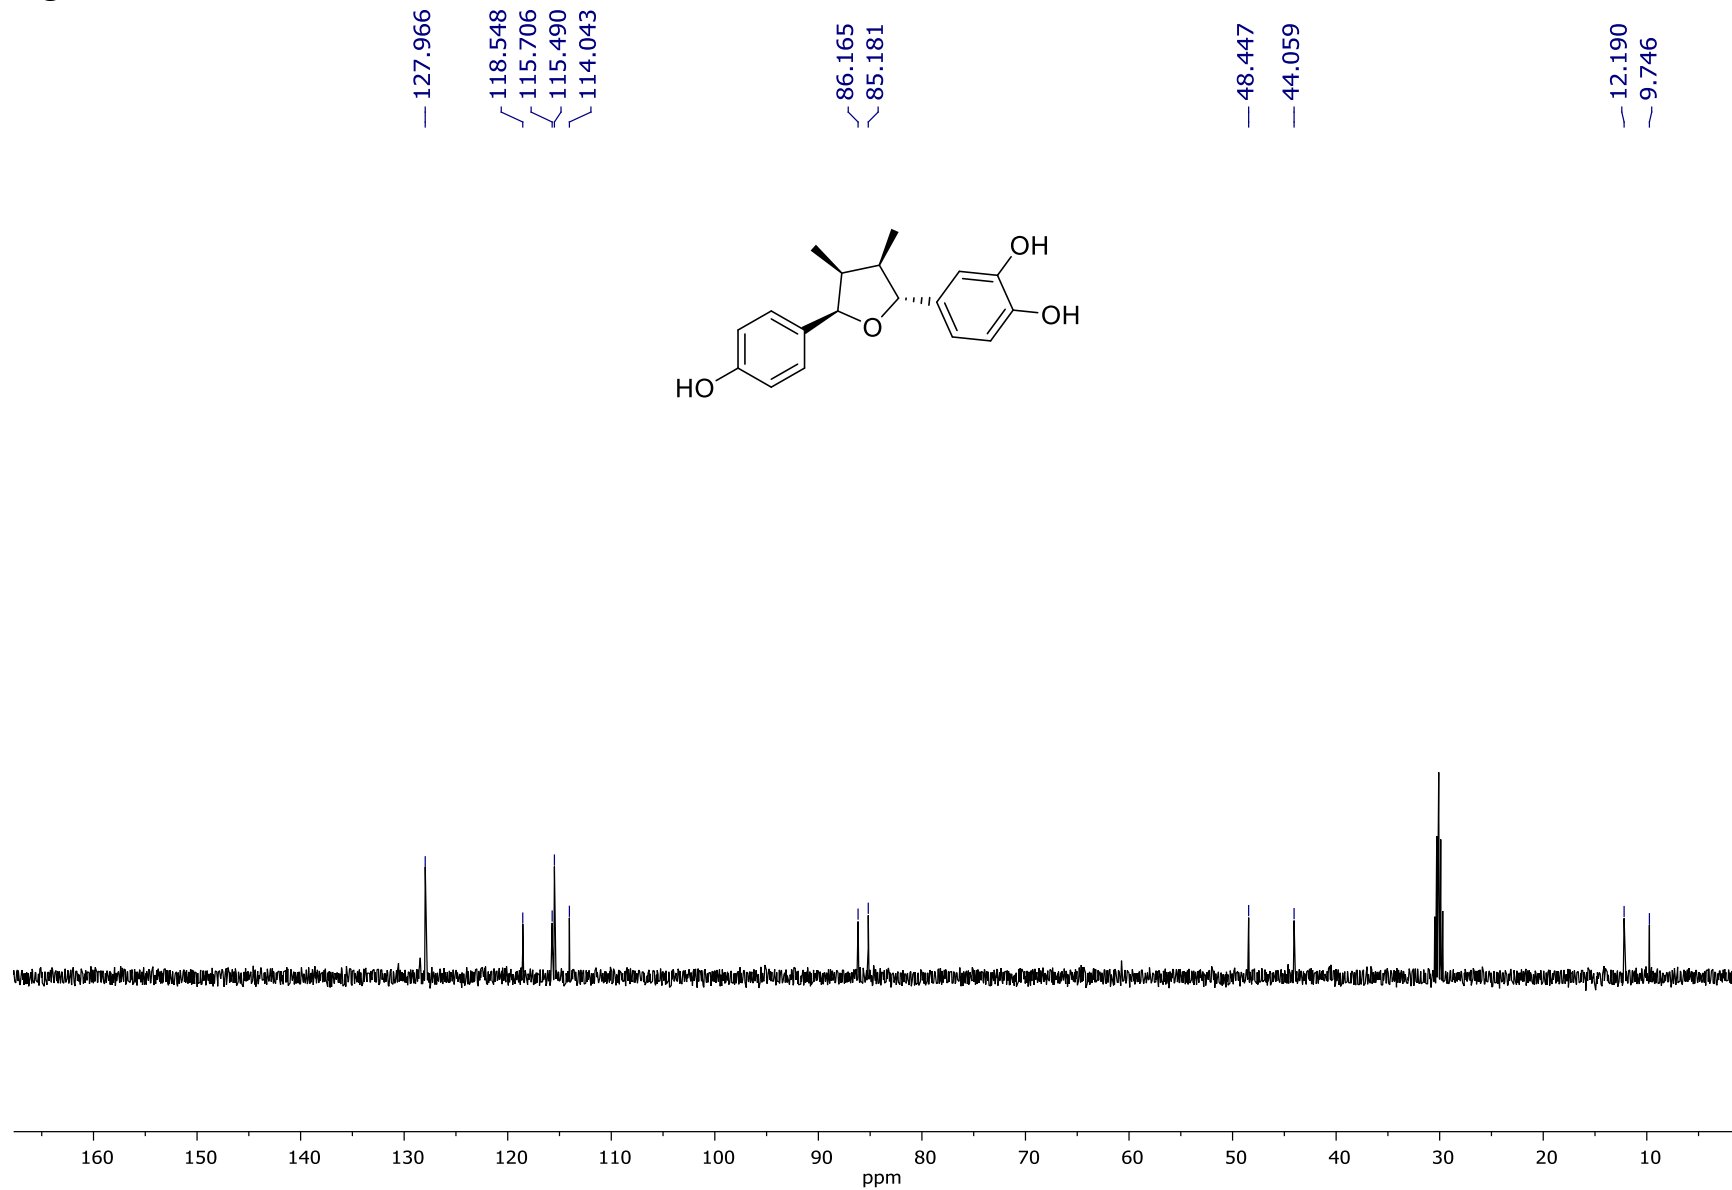

**Figure S34.**  $^{13}\text{C}$  DEPT-90 NMR spectrum of (7R, 7'R)-7, 7'-bis(4', 3, 4-trihydroxyphenyl)-(8R, 8'S)-8, 8'-dimethyltetrahydrofuran (**8**) in  $(\text{CD}_3)_2\text{CO}$

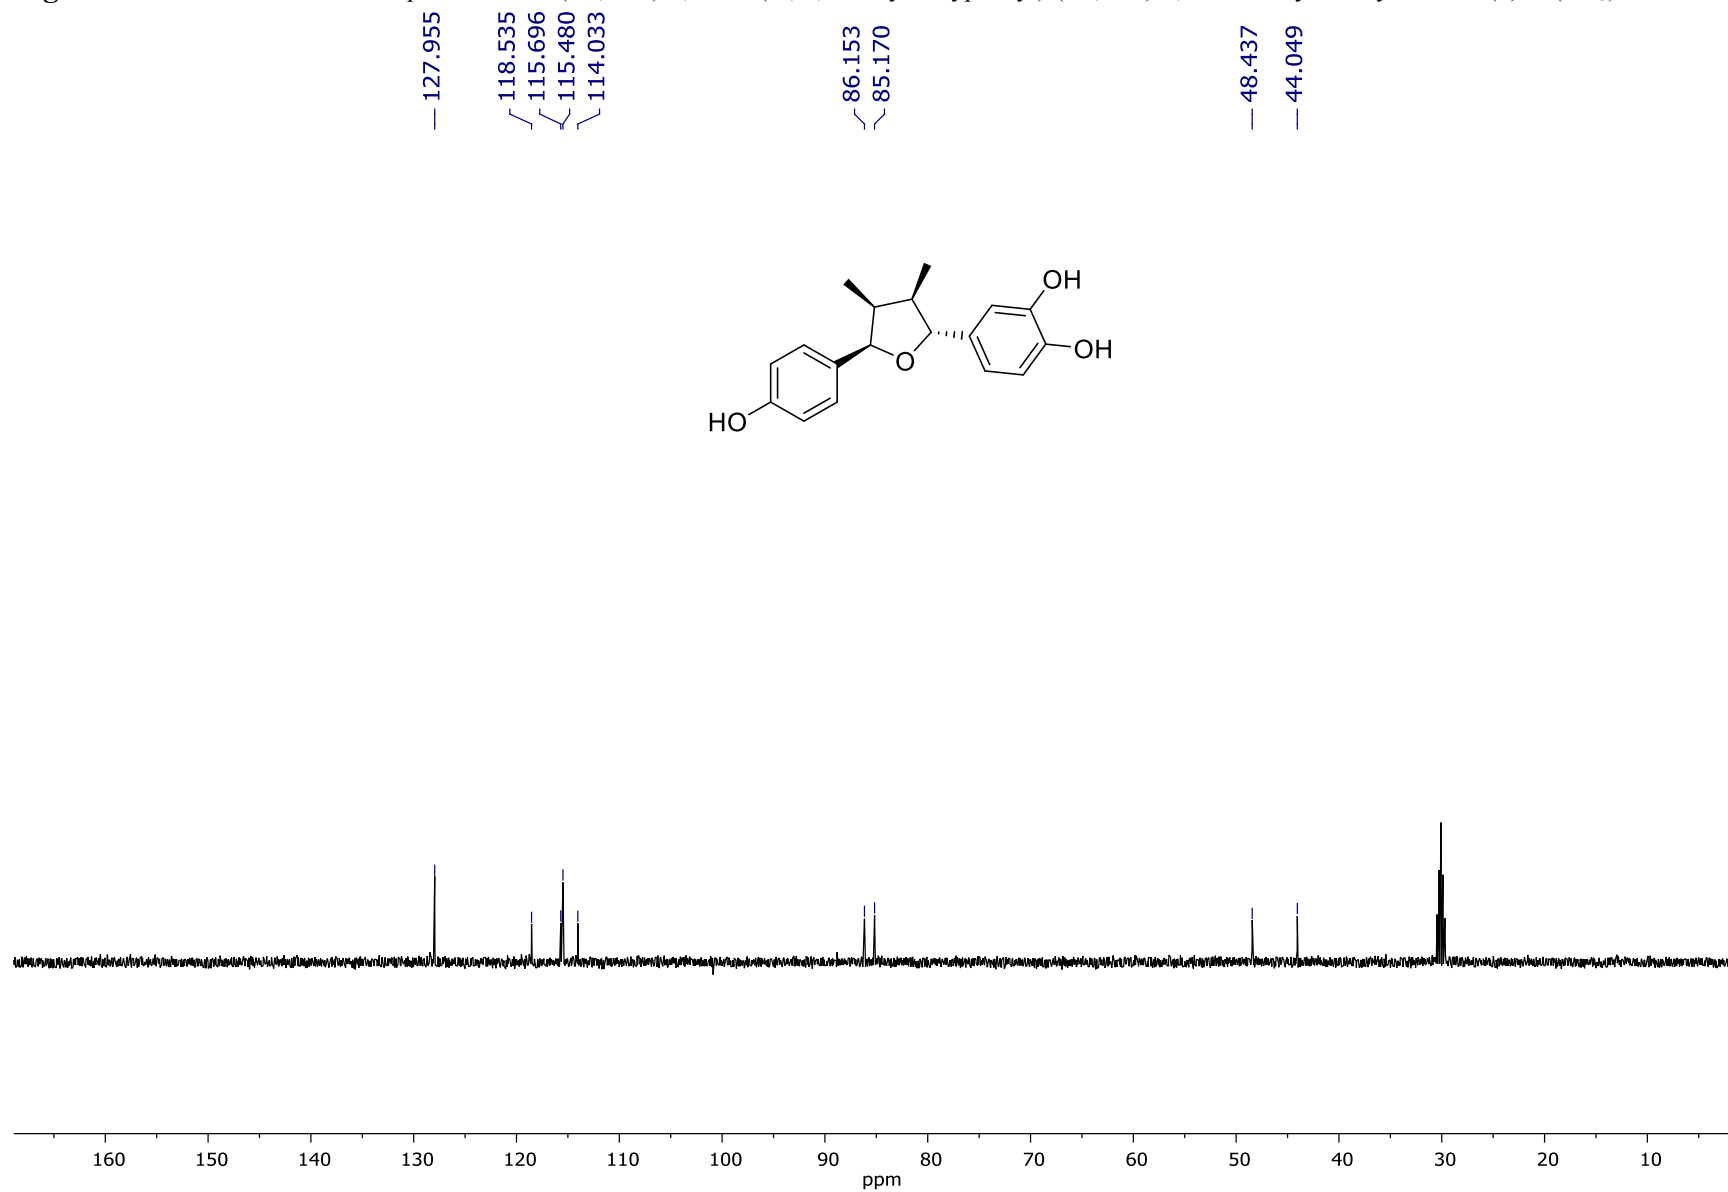

**Figure S35.** HMQC NMR spectrum of (7R, 7'R)-7, 7'-bis(4', 3, 4-trihydroxyphenyl)-(8R, 8'S)-8, 8'-dimethyltetrahydrofuran (**8**) in (CD<sub>3</sub>)<sub>2</sub>CO

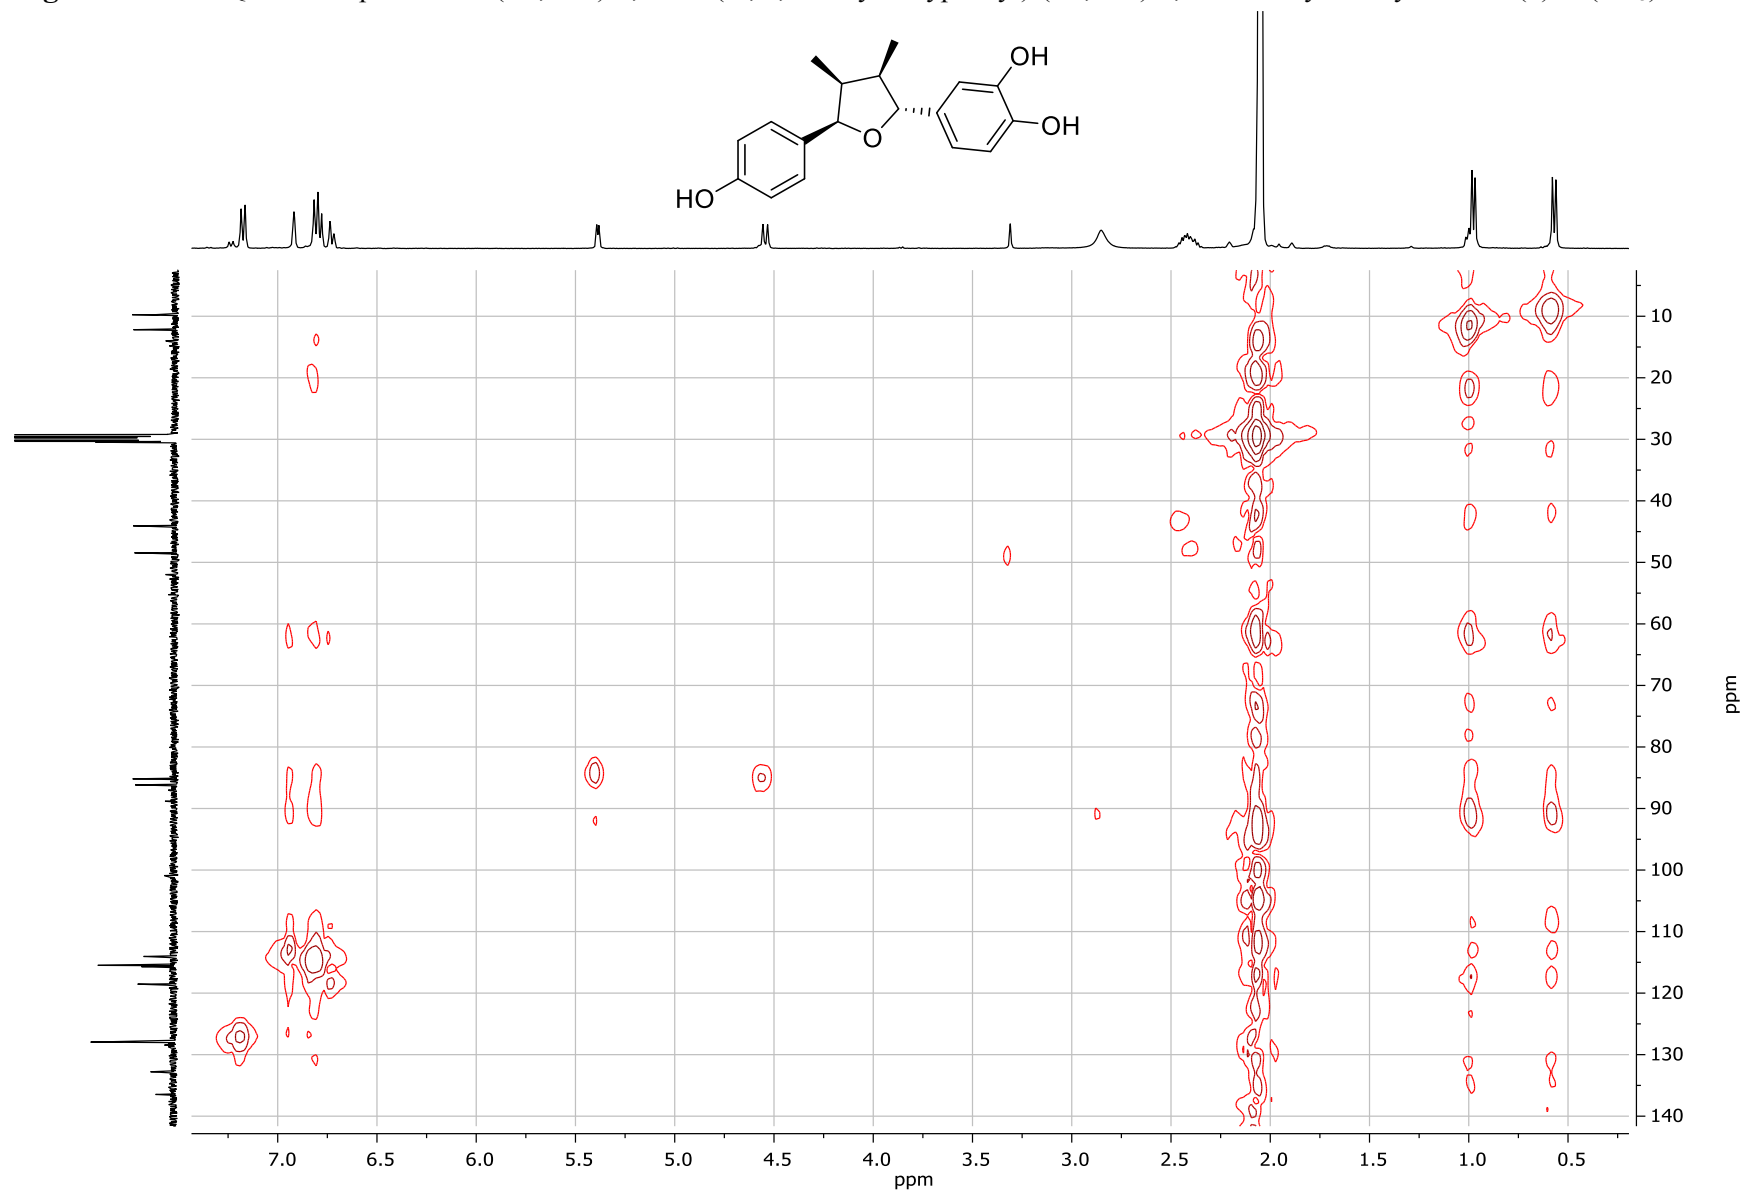

**Figure S36.** HMBC NMR spectrum of of (7R, 7'R)-7, 7'-bis(4', 3, 4-trihydroxyphenyl)-(8R, 8'S)-8, 8'-dimethyltetrahydrofuran (**8**) in (CD<sub>3</sub>)<sub>2</sub>CO

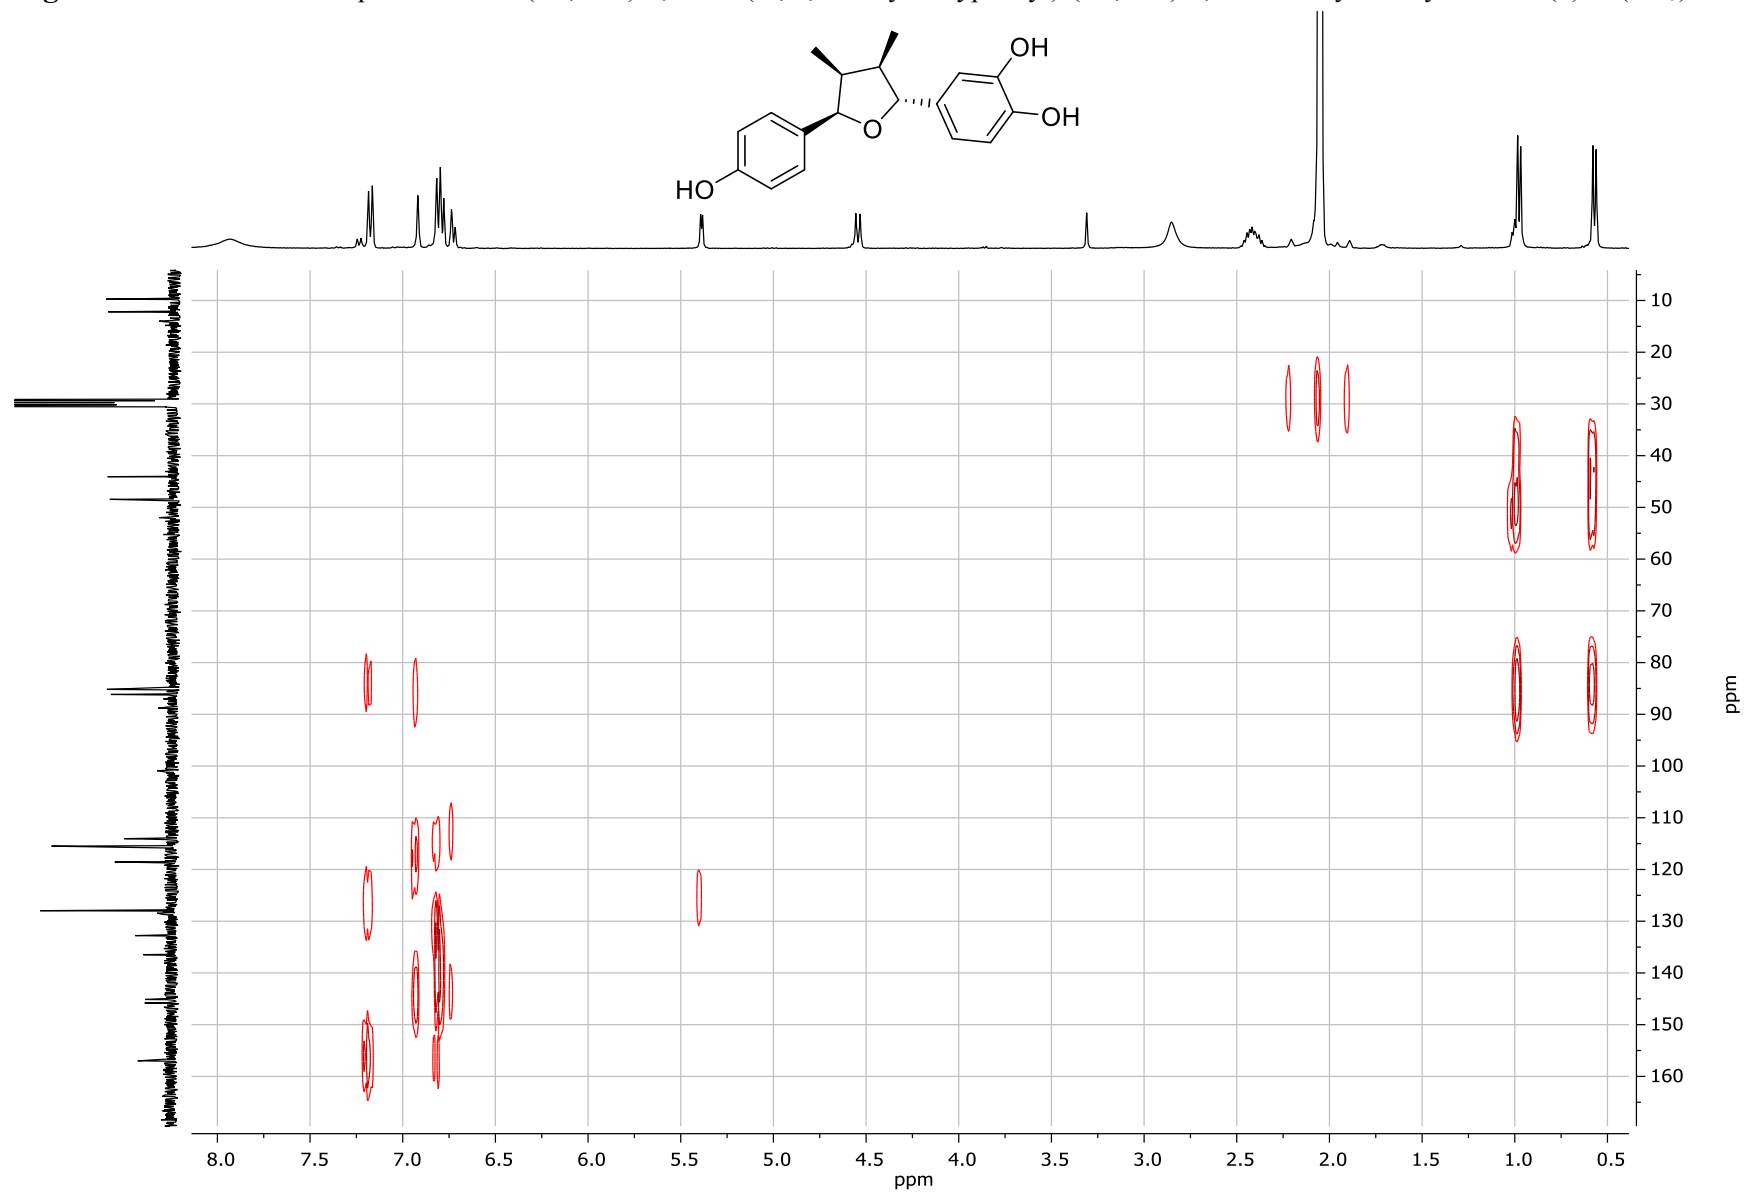

**Figure S37.** NOESY NMR spectrum of of (7R, 7'R)-7, 7'-bis(4', 3, 4-trihydroxyphenyl)-(8R, 8'S)-8, 8'-dimethyltetrahydrofuran (**8**) in (CD<sub>3</sub>)<sub>2</sub>CO

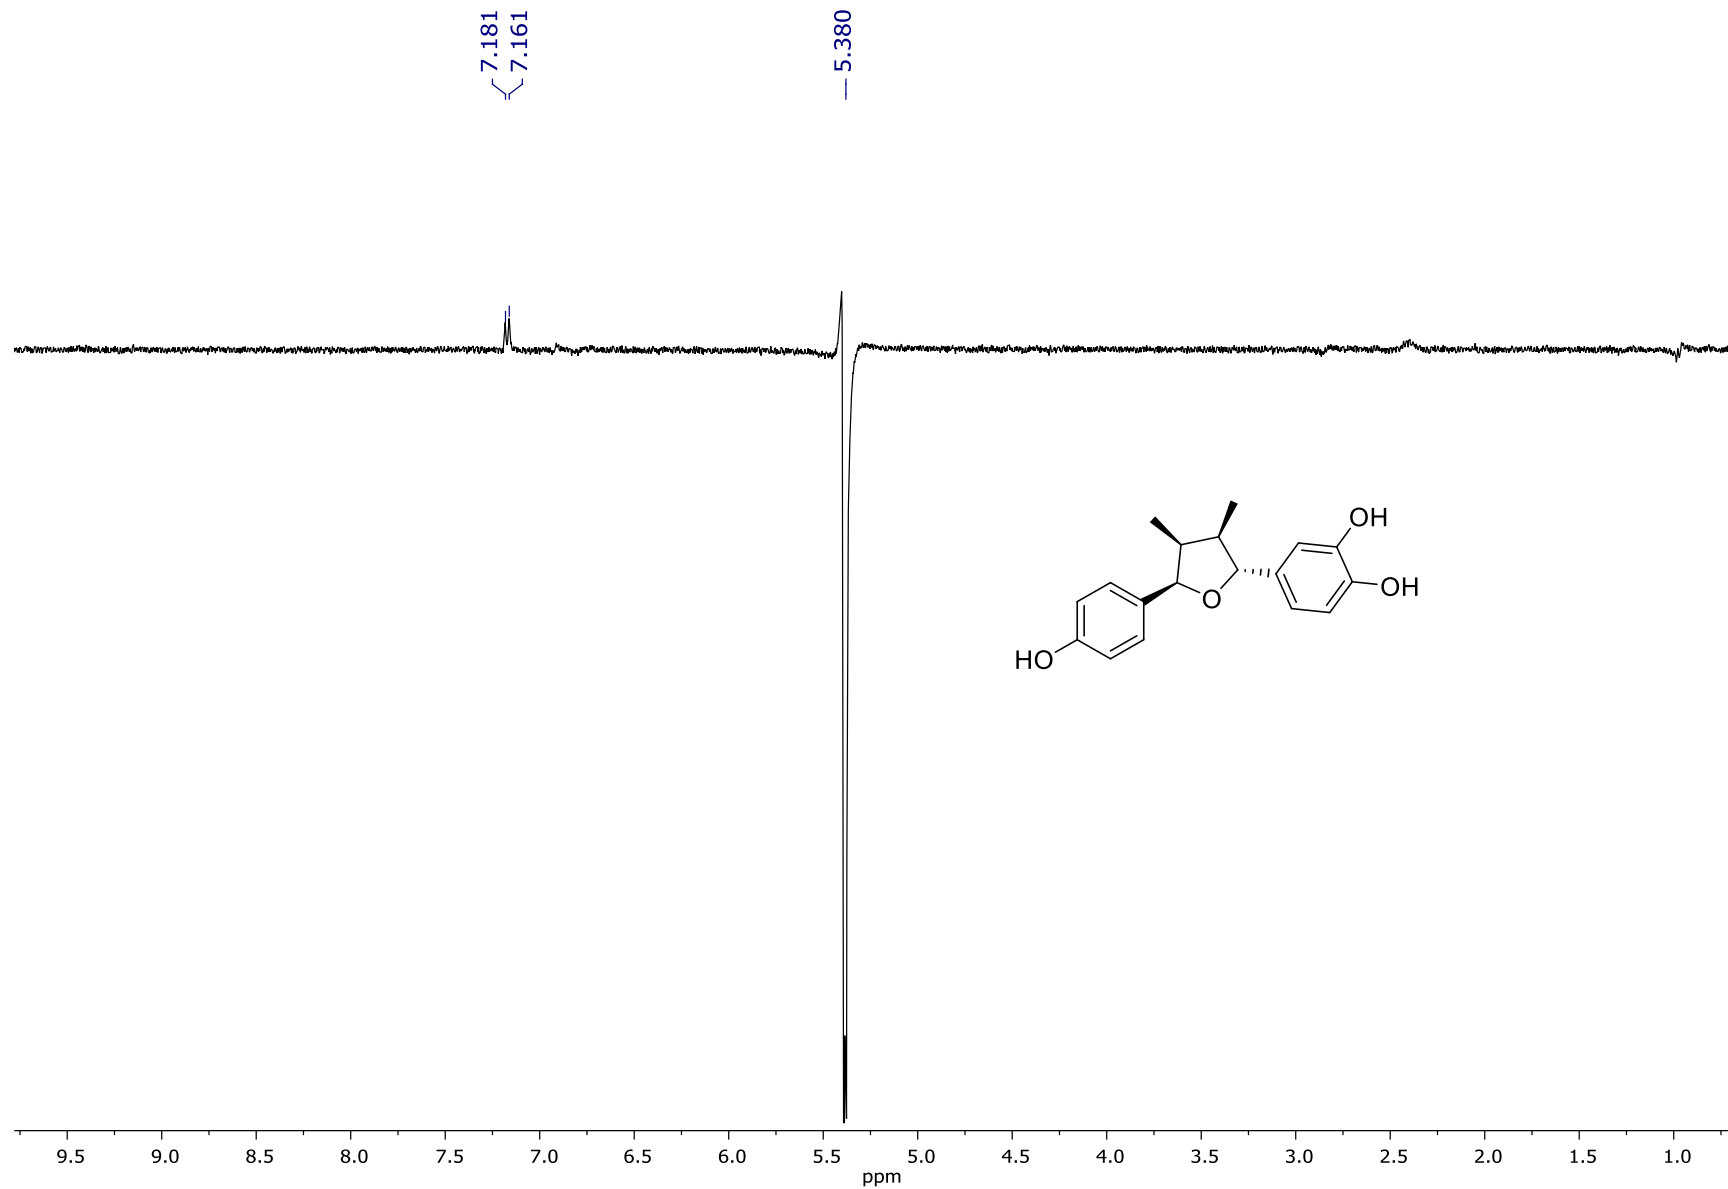

**Figure S38.** NOESY NMR spectrum of of (7R, 7'R)-7, 7'-bis(4', 3, 4-trihydroxyphenyl)-(8R, 8'S)-8, 8'-dimethyltetrahydrofuran (**8**) in (CD<sub>3</sub>)<sub>2</sub>CO

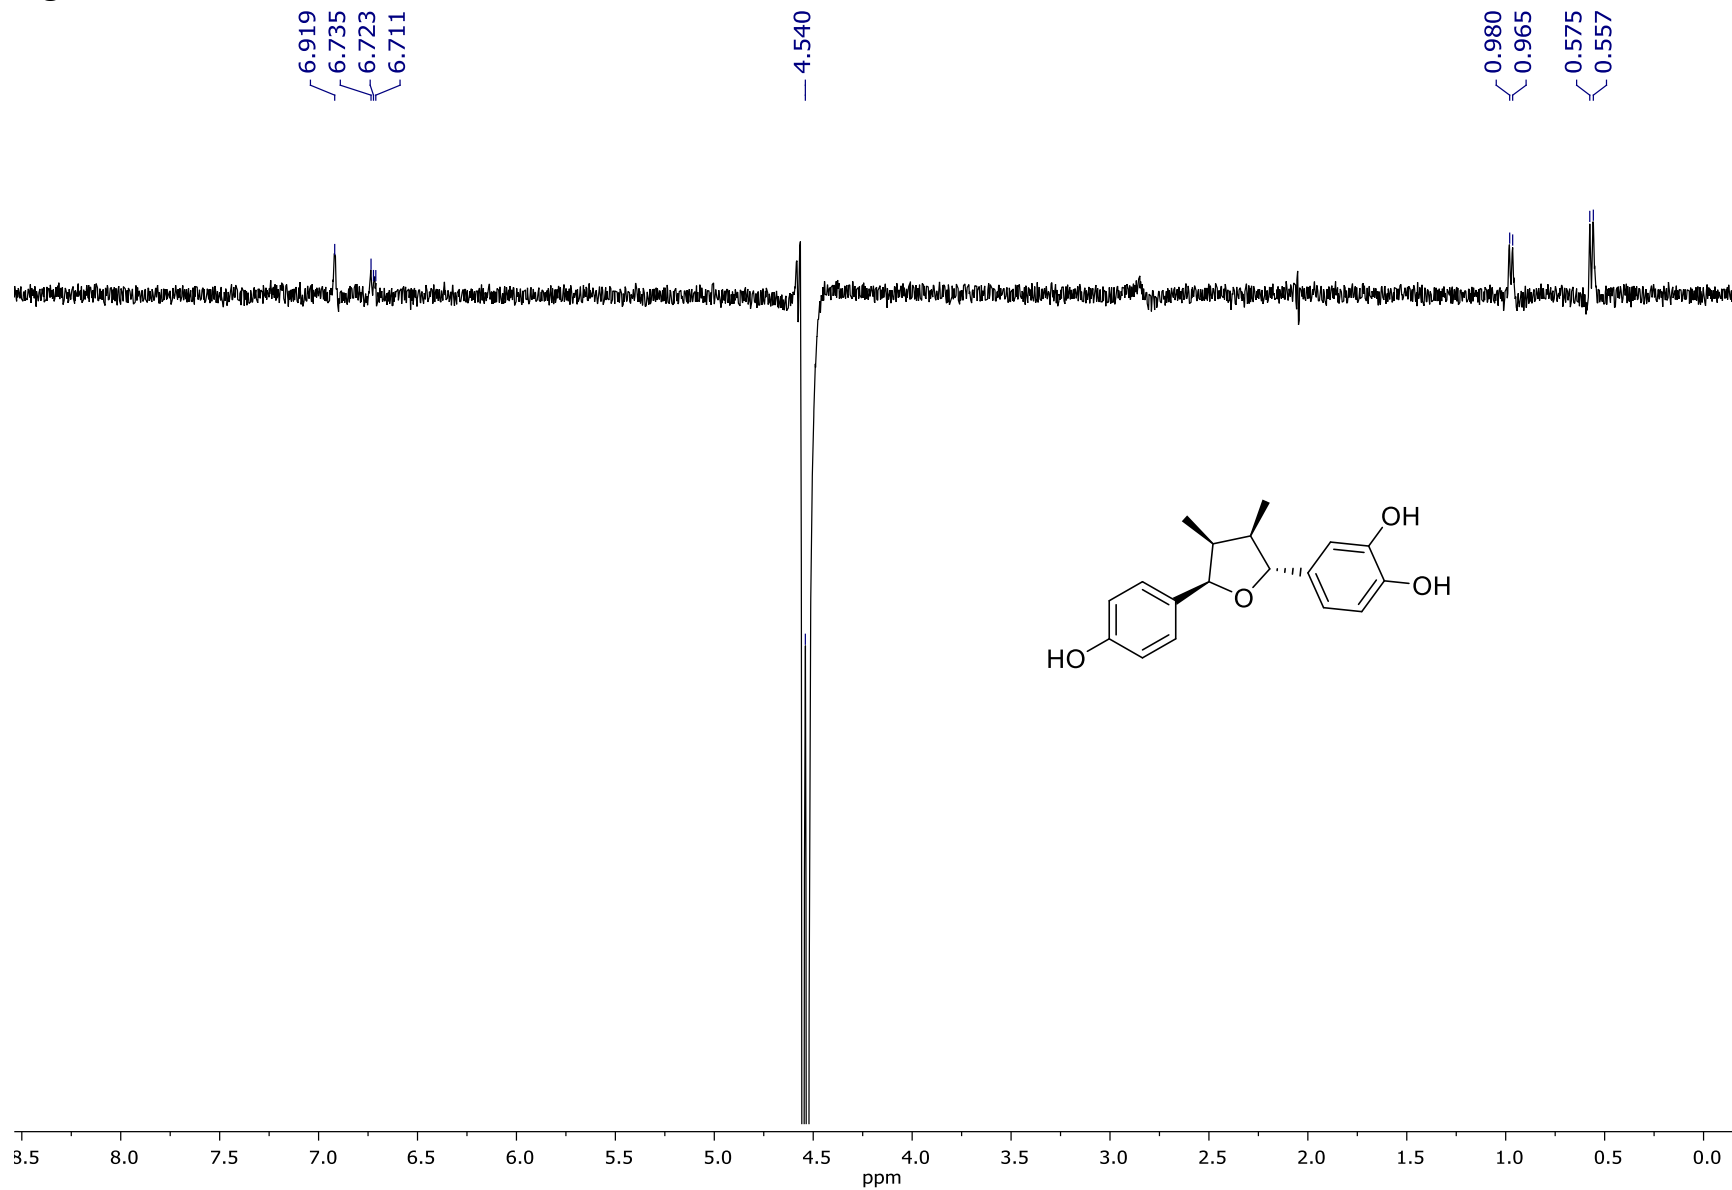

**Figure S39.**  $^1\text{H}$  NMR spectrum of 3-methoxy-6, 7, 4'-trihydroxyflavone (**9**) in  $\text{CDCl}_3$  and  $\text{CD}_3\text{OD}$

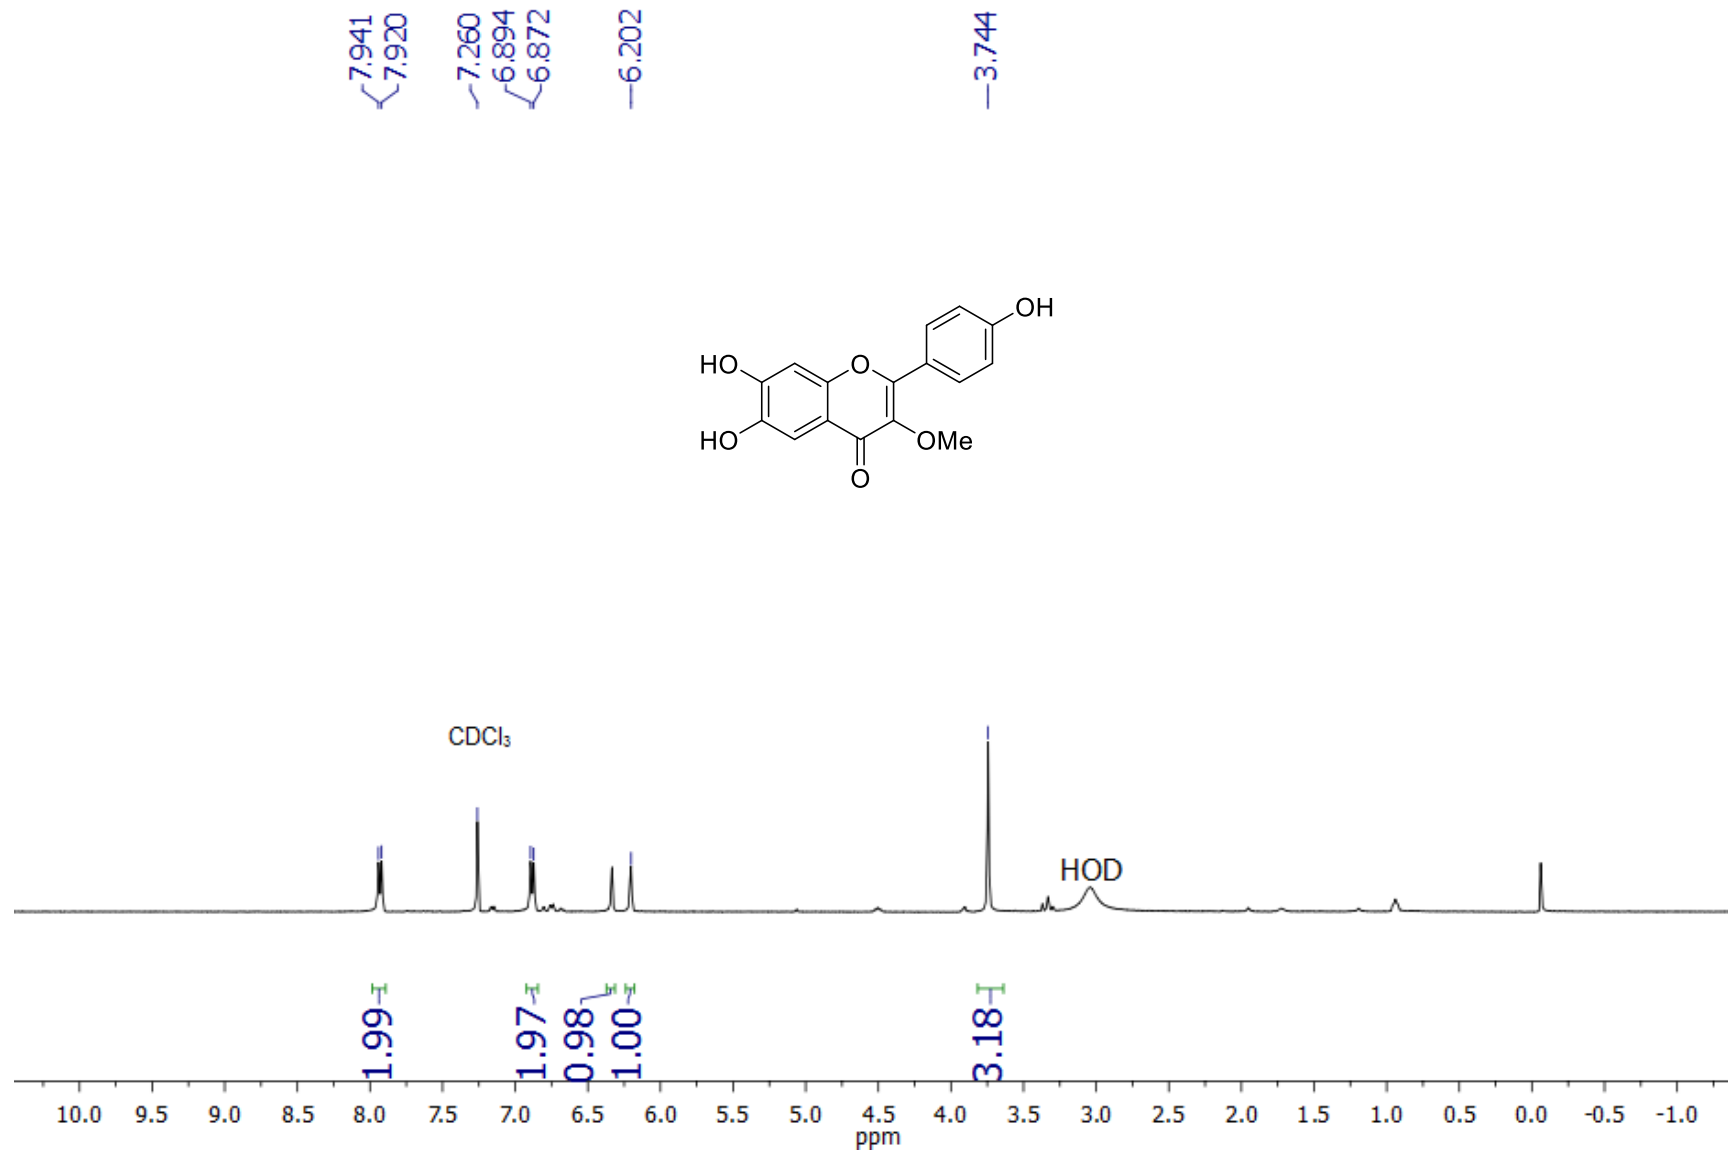



Figure S40.  $^{13}\text{C}$  NMR spectrum of 3-methoxy-6, 7, 4'-trihydroxyflavone (**9**) in  $\text{CDCl}_3$  and  $\text{CD}_3\text{OD}$

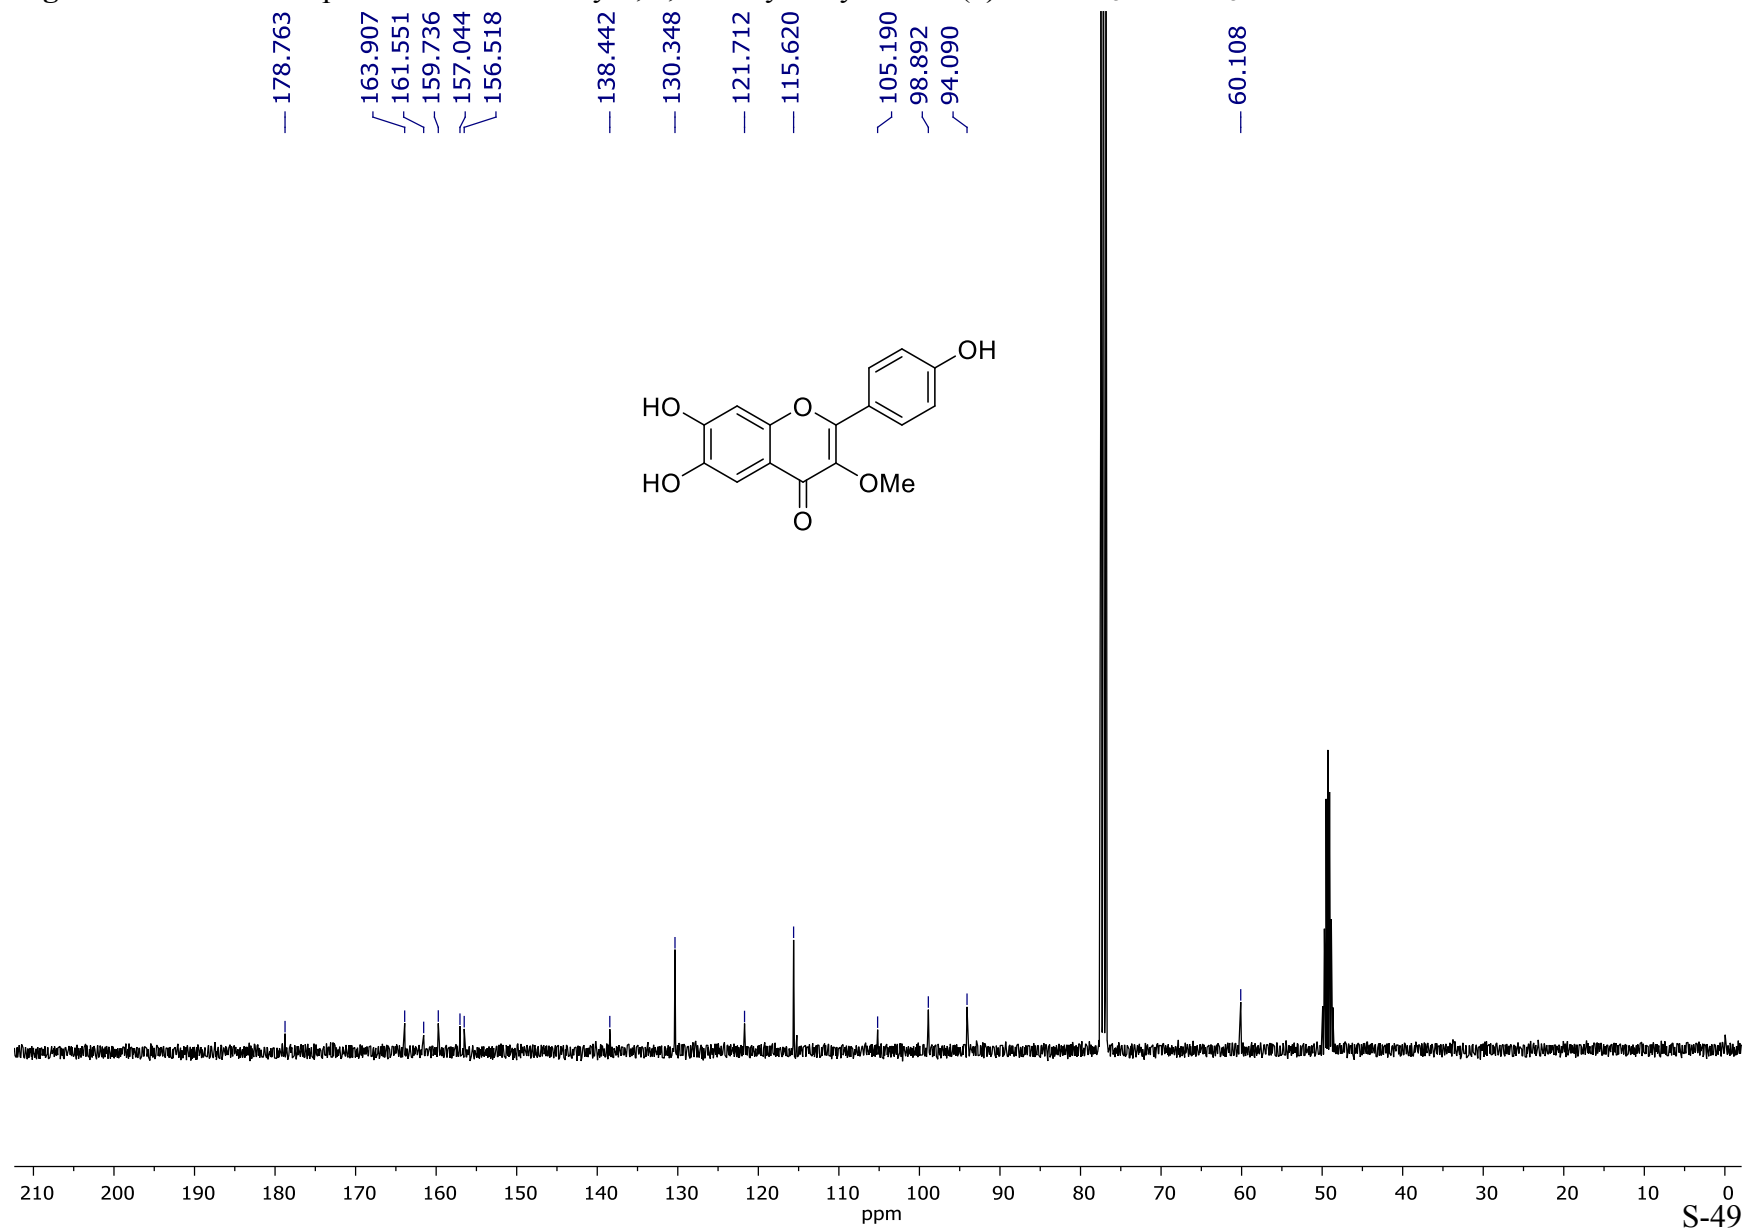

Figure S41.  $^{13}\text{C}$  DEPT-135 NMR spectrum of 3-methoxy-6, 7, 4'-trihydroxyflavone (**9**) in  $\text{CDCl}_3$  and  $\text{CD}_3\text{OD}$

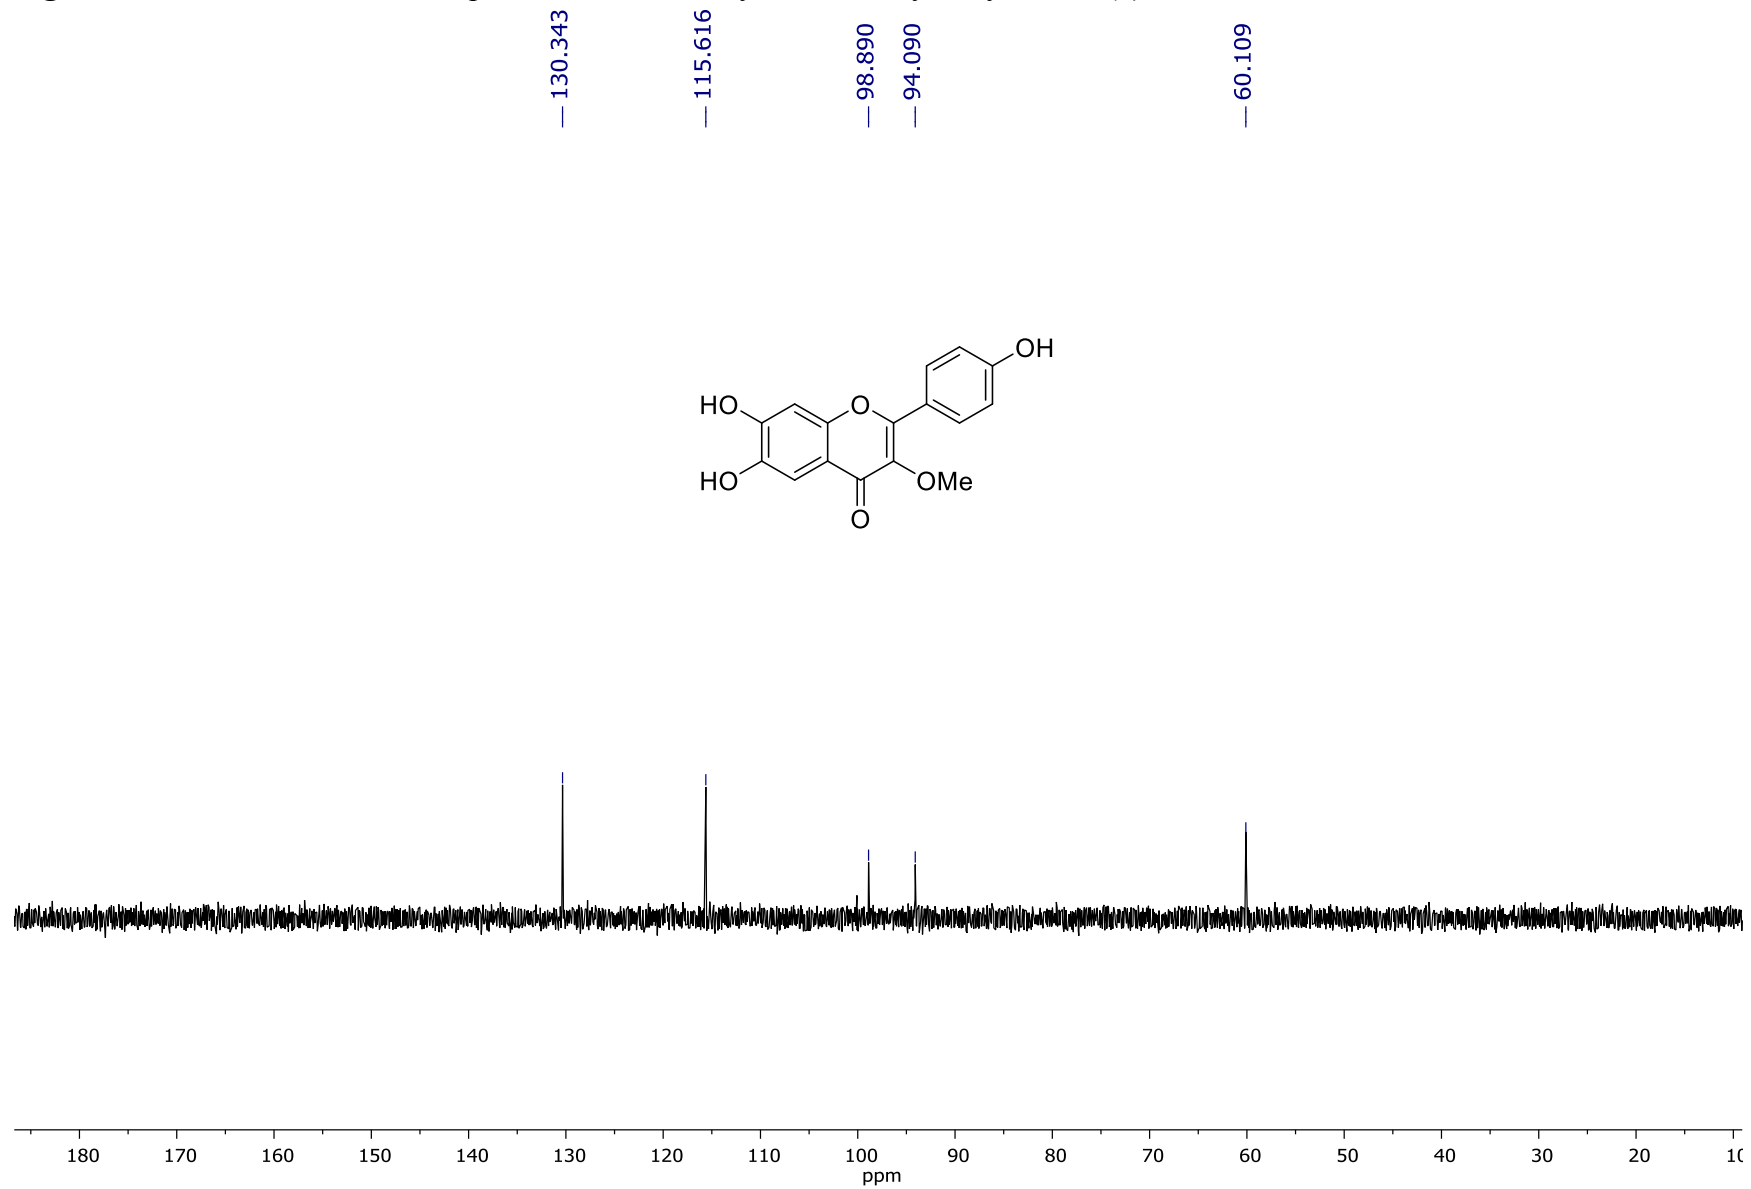

Figure S42.  $^{13}\text{C}$  DEPT-90 NMR spectrum of 3-methoxy-6, 7, 4'-trihydroxyflavone (**9**) in  $\text{CDCl}_3$  and  $\text{CD}_3\text{OD}$

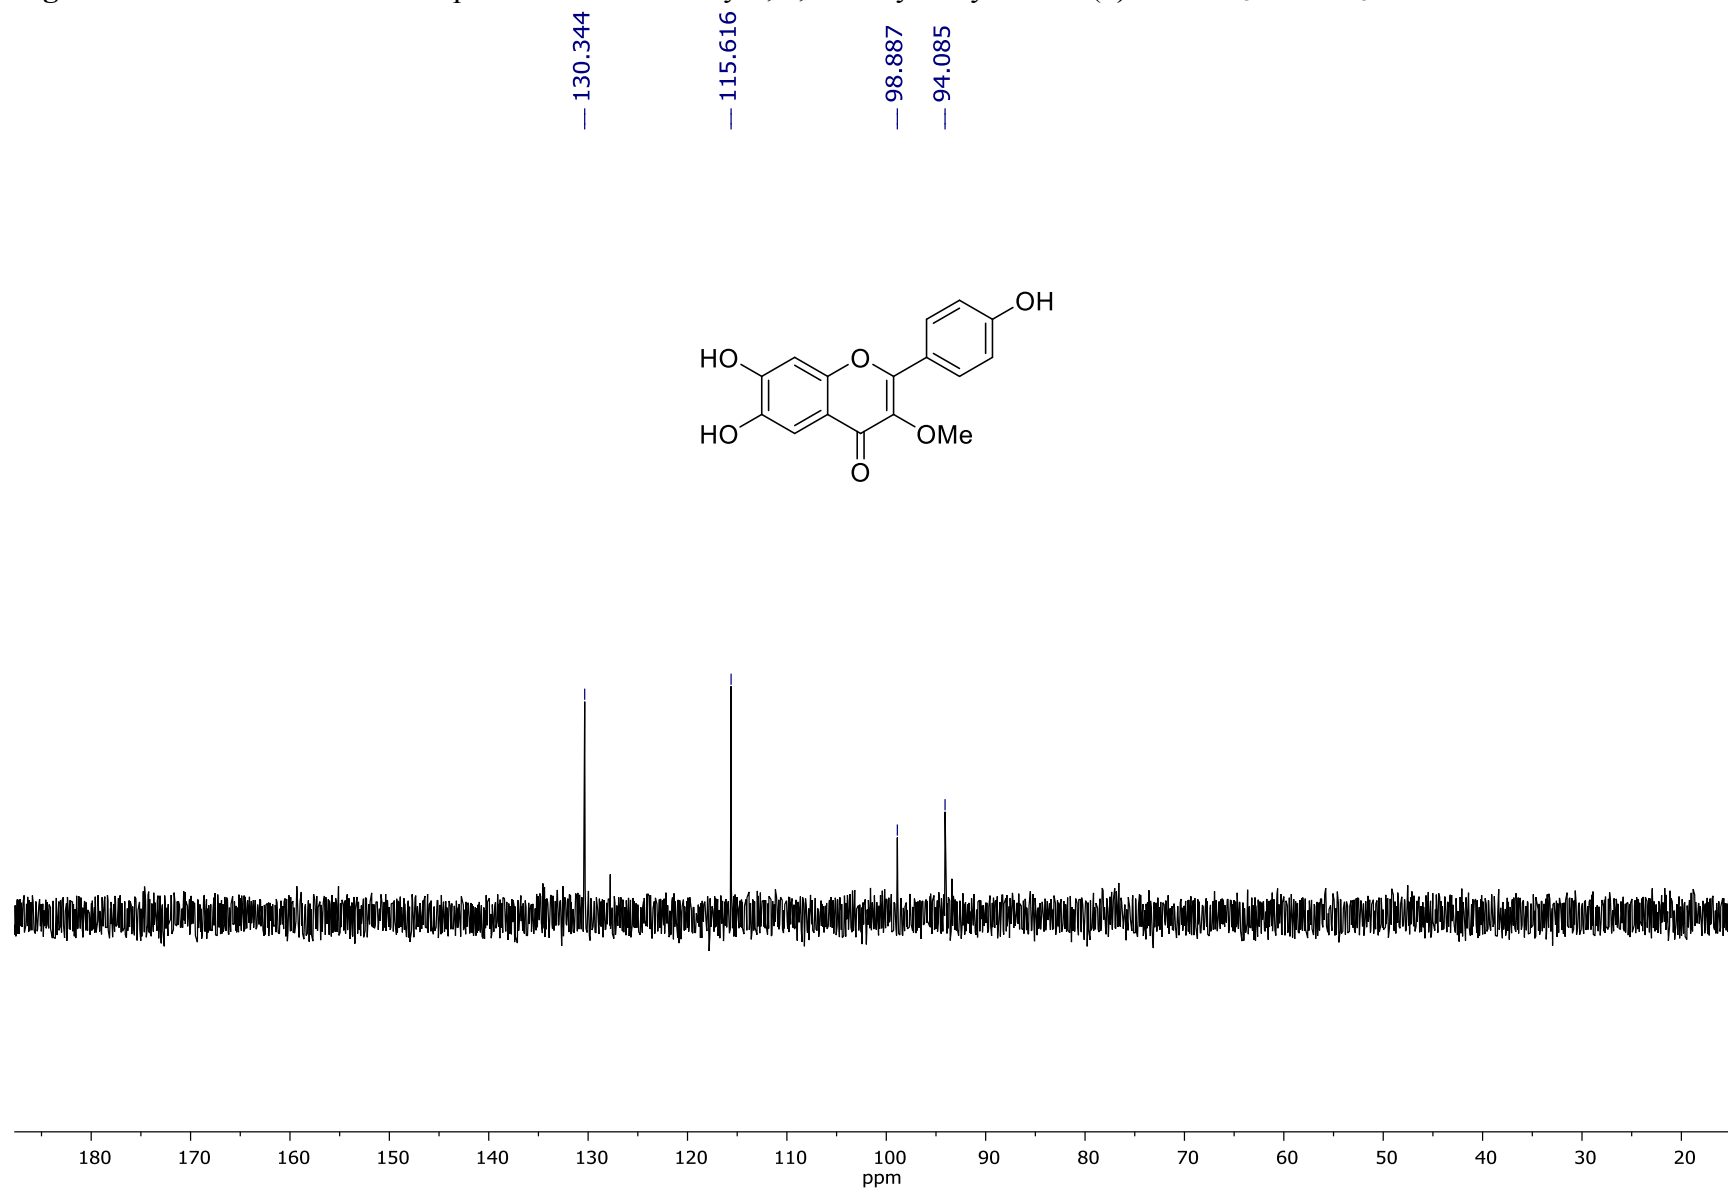

Figure S43. HMQC NMR spectrum of 3-methoxy-6, 7, 4'-trihydroxyflavone (**9**) in CDCl<sub>3</sub> and CD<sub>3</sub>OD

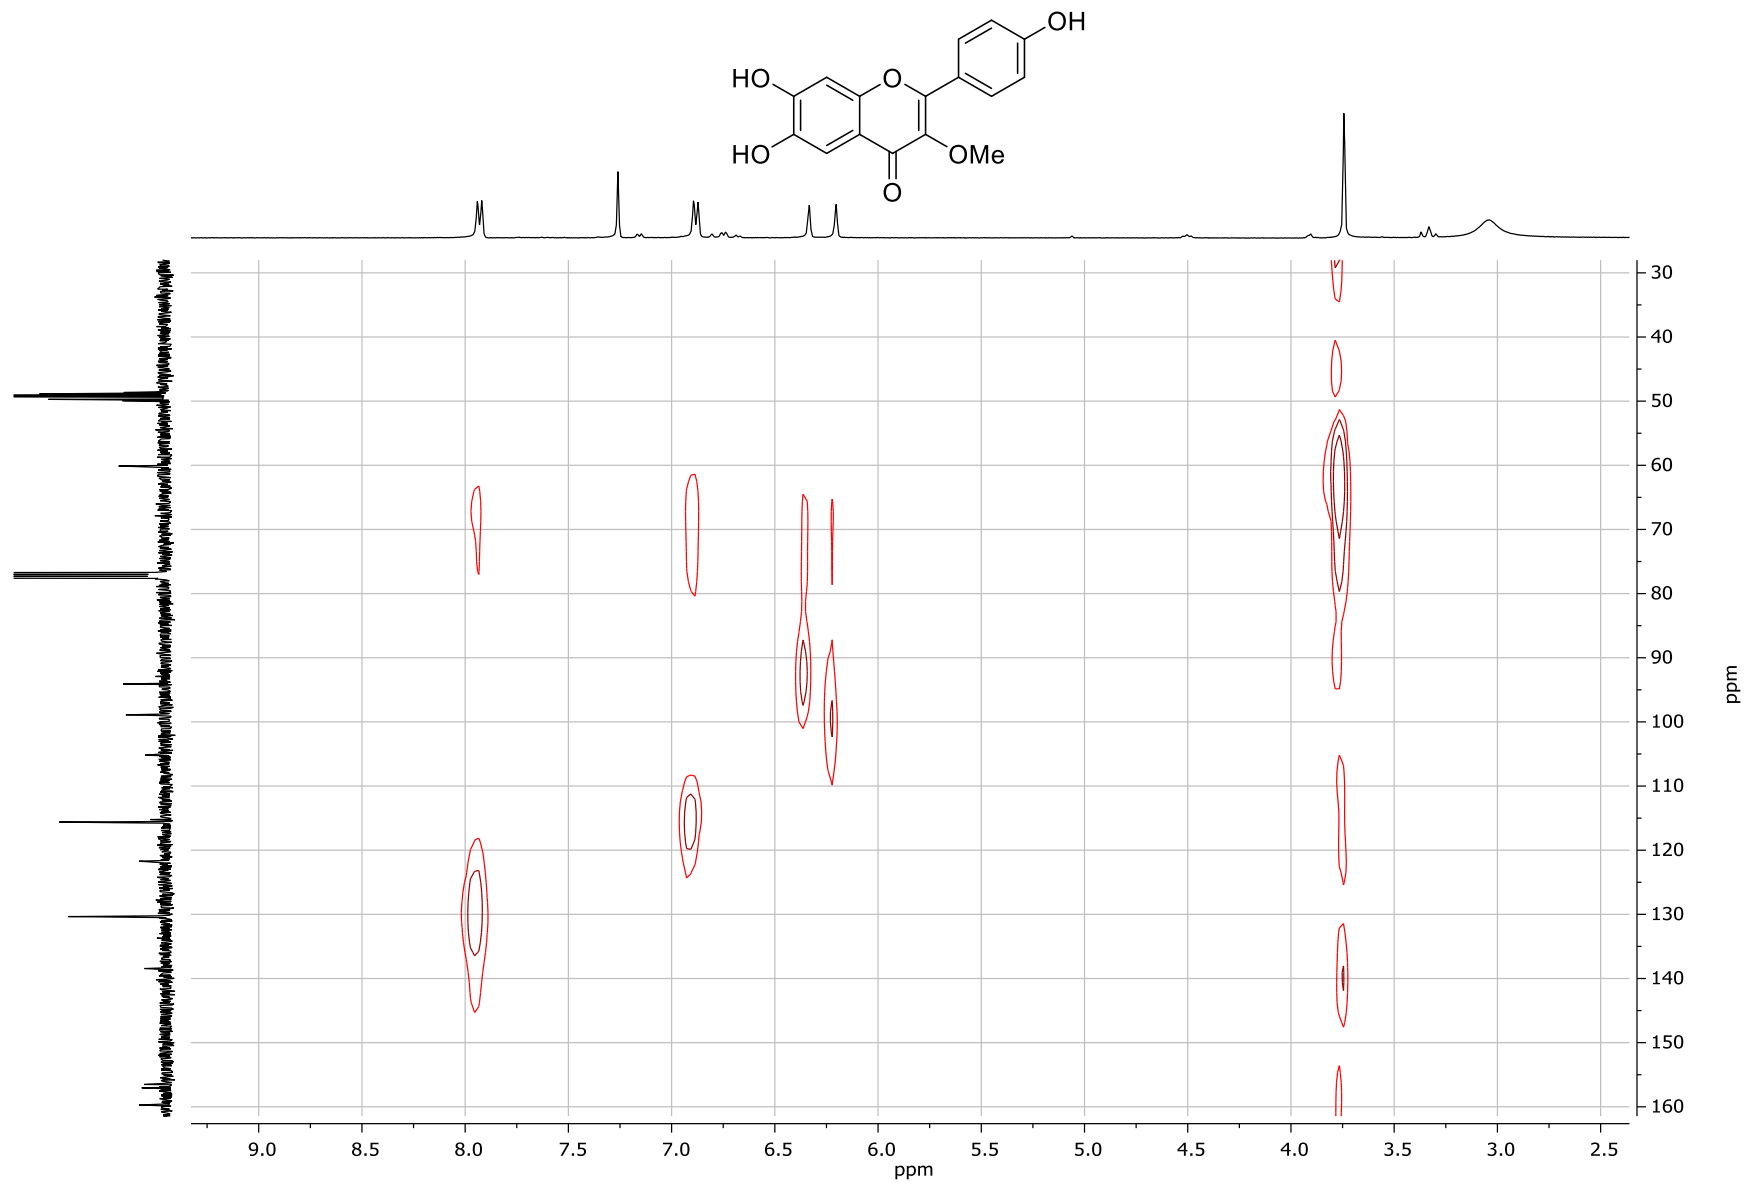

Figure S44. HMBC NMR spectrum of 3-methoxy-6, 7, 4'-trihydroxyflavone (**9**) in CDCl<sub>3</sub> and CD<sub>3</sub>OD

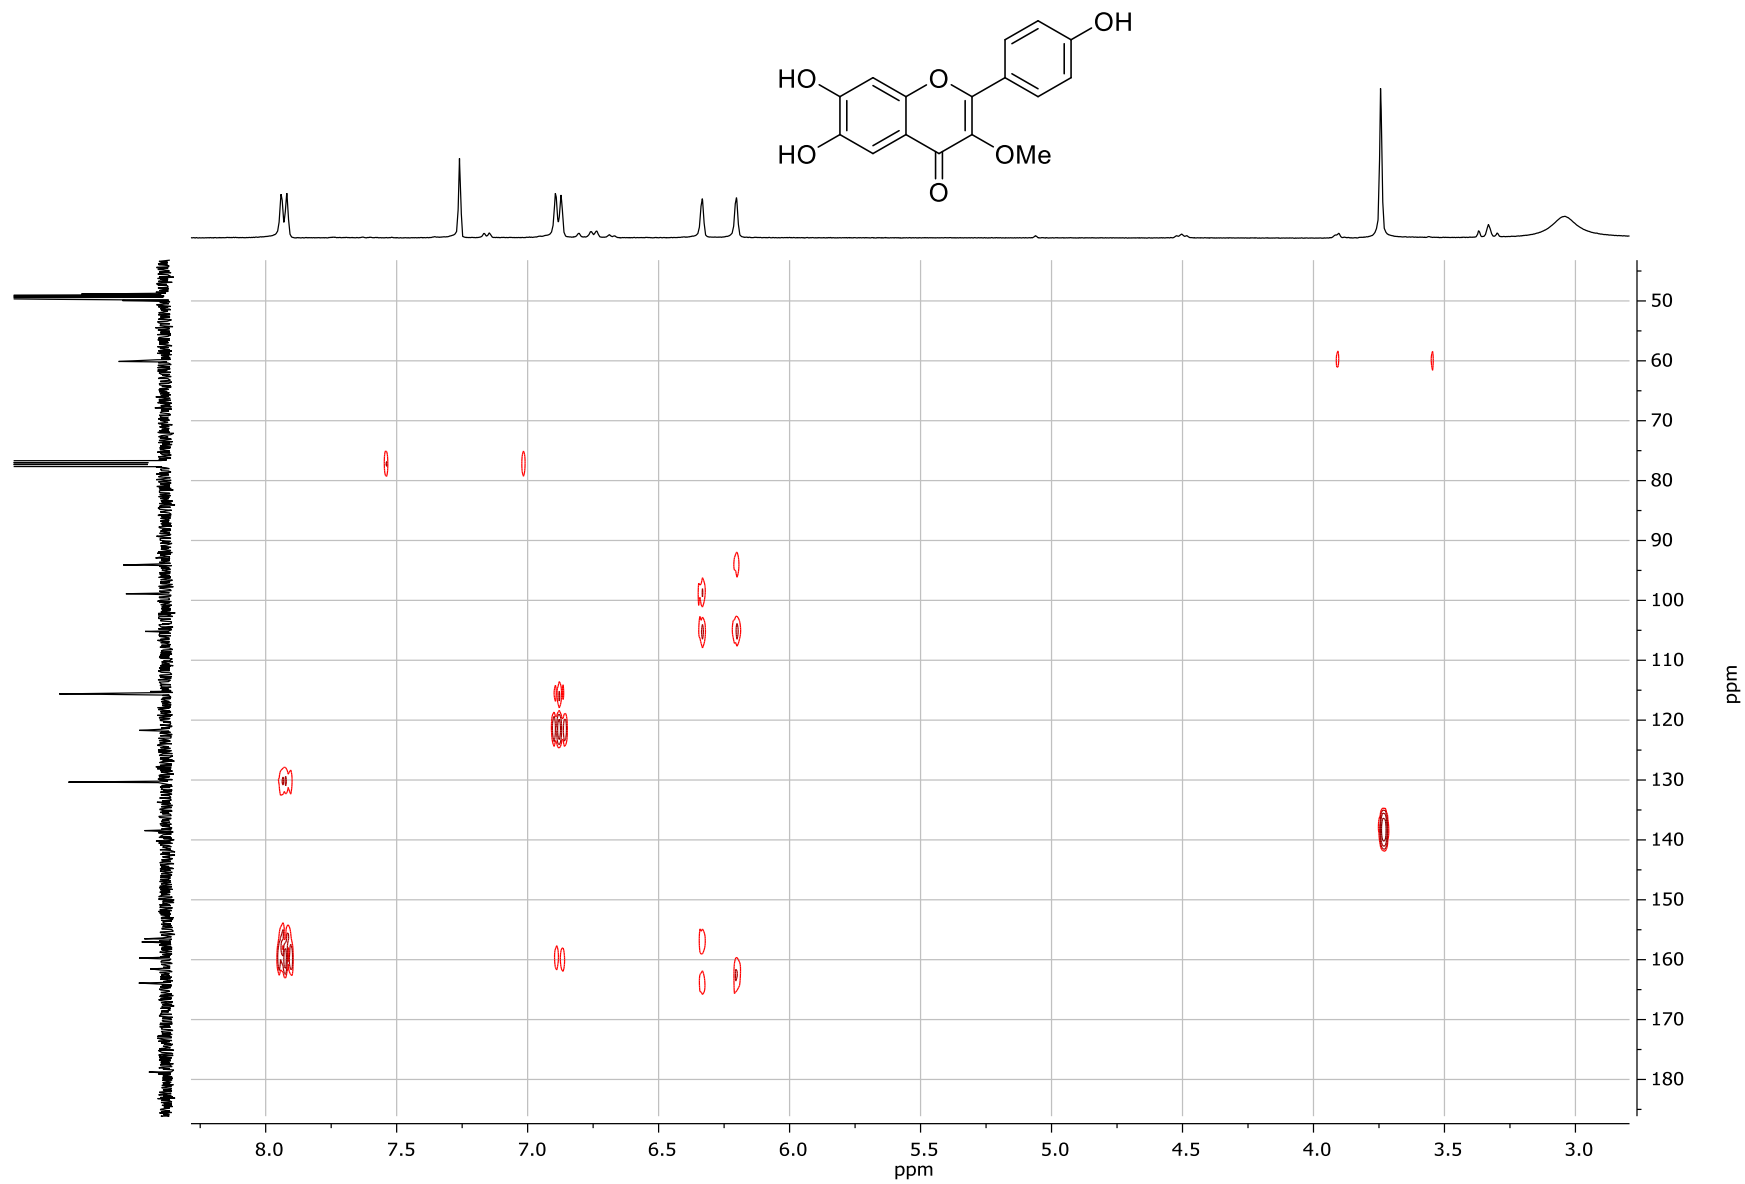

Supplement: pntd.0005832.s001.pdf [file pntd.0005832.s001.pdf]
